# Supplementary material
Source: publisher figshare collection journal article supplement (https://acs.figshare.com/ndownloader/files/7439941)
Supplement: Supplementary file 1 [file 7439941]

# Concise Syntheses of Hyrtioreticulins C and D *via* a C-4 Pictet-Spengler Reaction: Revised Signs of Specific Rotations

## Supporting Information

Takumi Abe\* and Koji Yamada\*

Faculty of Pharmaceutical Sciences, Health Sciences University of Hokkaido,  
Ishikari-tobetsu, Hokkaido 0610293, Japan

E-mail: [abe-t@hoku-iryo-u.ac.jp](mailto:abe-t@hoku-iryo-u.ac.jp)  
E-mail: [kyamada@hoku-iryo-u.ac.jp](mailto:kyamada@hoku-iryo-u.ac.jp)

### Contents

|                                                          |      |
|----------------------------------------------------------|------|
| 1. General Methods                                       | 2    |
| 2. Synthesis of <b>14</b> , <b>16</b> , and <b>17</b>    | 2    |
| 3. Synthesis of <b>20</b> and <b>21</b>                  | 4    |
| 4. Synthesis of <b>18</b> and <b>19</b>                  | 5    |
| 5. Synthesis of <b>3-6</b>                               | 6    |
| 6. References                                            | 7    |
| 7. Copies of $^1\text{H}$ , $^{13}\text{C}$ -NMR spectra | 8-92 |

## EXPERIMENTAL

### 1. General Methods

Optical rotations were recorded on a JASCO P-2200 polarimeter. Melting points were recorded with a Yamato MP21 and are uncorrected. High-resolution MS spectra were recorded with a Micromass AutoSpec 3100 and a JEOL JMS-T100LP mass spectrometers. IR spectra were measured with a Shimadzu IRAffinity-1 spectrometer. The NMR experiments were performed with a JEOL JNM-ECA500 (500 MHz) spectrometer, and chemical shifts are expressed in ppm (d) with TMS as an internal reference. Column chromatography, Flash column chromatography and Medium Pressure Liquid Chromatography (MPLC) were performed on silica gel (Silica Gel 60N, Kanto Chemical Co., Ltd.). Microwave irradiation was performed with a Green-Motif I (IMCR-25003) monomode microwave reactor (IDX Corporation). All microwave irradiation experiments were carried out in glass tubes with microwave power at 50 W or 80 W.

### 2. Synthesis of 14, 16, and 17 (scheme 1).

#### Acid-promoted Pictet-Spengler reactions at room temperature:

3-Methylbutanal (60  $\mu$ L, 0.6 mmol) was added to a solution of tryptophan **13** (47mg, 0.2 mmol) in MeOH (4 mL) and stirred at room temperature. After 120 h, the mixture was added to saturated  $\text{NaHCO}_3$  solution at 0  $^\circ\text{C}$ , extracted with AcOEt (50 mL), washed with brine, and dried over  $\text{MgSO}_4$ . The solvent was removed, and the residue was purified by silica gel column chromatography with  $\text{CHCl}_3/\text{MeOH}$  (2/1) to give **16** (12 mg, 20% yield) and **17** (11 mg, 18% yield).

#### Acid-promoted Pictet-Spengler reactions under reflux:

3-Methylbutanal (60  $\mu$ L, 0.6 mmol) was added to a solution of tryptophan **13** (47mg, 0.2 mmol) in MeOH (4 mL) and stirred for 48 h under reflux. After the mixture had cooled, the mixture was added to saturated  $\text{NaHCO}_3$  solution at 0  $^\circ\text{C}$ , extracted with AcOEt (50 mL), washed with brine, and dried over  $\text{MgSO}_4$ . The solvent was removed, and the residue was purified by silica gel column chromatography with  $\text{CHCl}_3/\text{MeOH}$  (2/1) to give **14** (8 mg, 14% yield), **16** (29 mg, 48% yield), and **17** (14 mg, 23% yield).

#### Methyl (1*R*,3*S*)-6-hydroxy-1-isobutyl-2,3,4,9-tetrahydro-1*H*-pyrido[3,4-*b*]indole-3-carboxylate (**16**).

14 mg, 23% yield, an amorphous white powder.  $[\alpha]_D^{24} = +26.2$  ( $c = 0.10$  in MeOH). Mp: 114-117  $^\circ\text{C}$  ( $\text{CHCl}_3/\text{MeOH}$ ). IR ( $\text{CHCl}_3$ ): 3471, 1734  $\text{cm}^{-1}$ .  $^1\text{H-NMR}$  ( $\text{DMSO-}d_6$ )  $\delta$ : 0.98, 0.99, 1.01, 1.02 (4 s, 6H), 1.49 (dd,  $J = 4.6, 9.5$  Hz, 1H), 1.70 (dd,  $J = 4.6, 9.8$  Hz, 1H), 1.92 (m, 1H), 2.88 (dd,  $J = 7.5, 15.5$  Hz, 1H), 2.99 (dd,  $J = 5.2, 15.5$  Hz, 1H), 3.75 (s, 3H), 3.95 (dd,  $J = 5.2, 7.5$  Hz, 1H), 4.26 (dd,  $J = 4.1, 9.8$  Hz, 1H), 6.69 (dd,  $J = 2.3, 8.6$  Hz, 1H), 6.84 (d,  $J = 2.3$  Hz, 1H), 7.11 (d,  $J = 8.6$  Hz, 1H), 7.25 (br s, 1H), 7.58 (br s, 1H).  $^{13}\text{C-NMR}$  ( $\text{DMSO-}d_6$ )  $\delta$ : 21.8, 23.7, 24.8, 25.0, 44.5, 48.3, 52.3, 52.5, 103.1, 106.5, 111.2, 111.3, 128.0, 131.1, 137.2, 149.6, 174.3. HR-EI-MS  $m/z$ : Calcd for  $\text{C}_{17}\text{H}_{22}\text{N}_2\text{O}_3$  [ $\text{M}^+$ ]: 302.1630. Found 302.1632.

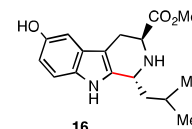

#### Methyl (1*S*,3*S*)-6-hydroxy-1-isobutyl-2,3,4,9-tetrahydro-1*H*-pyrido[3,4-*b*]indole-3-carboxylate (**17**).

29 mg, 48% yield, an amorphous white powder.  $[\alpha]_D^{24} = -71.1$  ( $c = 0.10$  in MeOH). Mp: 154-156  $^\circ\text{C}$  ( $\text{CHCl}_3/\text{MeOH}$ ). IR ( $\text{CHCl}_3$ ): 3480, 1718  $\text{cm}^{-1}$ .  $^1\text{H-NMR}$  ( $\text{DMSO-}d_6$ )  $\delta$ : 0.89 (d,  $J = 6.9$  Hz, 3H), 0.93 (d,  $J = 6.9$  Hz, 3H), 1.42 (ddd,  $J = 2.9, 9.8, 13.7$  Hz, 1H), 1.76 (ddd,  $J = 2.9, 9.8, 13.7$  Hz, 1H), 1.87 (m, 1H), 2.53 (ddd,  $J = 1.7, 12.1, 13.7$  Hz, 1H), 2.77 (dd,  $J = 2.9, 14.3$  Hz, 1H), 3.62 (dd,  $J = 4.0, 10.9$  Hz, 1H), 3.67 (s, 3H), 4.01 (d,  $J = 9.8$  Hz, 1H), 6.48 (dd,  $J = 1.8, 8.1$  Hz, 1H), 6.62 (d,  $J = 2.3$  Hz, 1H), 7.02 (d,  $J = 8.6$  Hz, 1H), 8.55 (br s, 1H), 10.36 (br s, 1H).  $^{13}\text{C-NMR}$  ( $\text{DMSO-}d_6$ )  $\delta$ : 22.0, 24.2, 24.5, 26.3, 43.6, 51.0, 52.2, 56.7, 102.2, 105.6, 110.9, 111.8, 128.0, 130.8, 138.2, 150.8, 174.1. HR-EI-MS  $m/z$ : Calcd for  $\text{C}_{17}\text{H}_{22}\text{N}_2\text{O}_3$  [ $\text{M}^+$ ]: 302.1630. Found 302.1631.

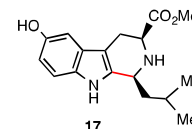



**Base-promoted Pictet-Spengler reaction:**

3-Methylbutanal (60  $\mu$ L, 0.6 mmol) was added to a solution of tryptophan **13** (47mg, 0.2 mmol) in Et<sub>3</sub>N/MeOH (1/1, v/v, 4 mL) and stirred for 48 h under reflux. After the mixture had cooled, the mixture was added to saturated NaHCO<sub>3</sub> solution at 0 °C, extracted with AcOEt (50 mL), washed with brine, and dried over MgSO<sub>4</sub>. The solvent was removed, and the residue was purified by silica gel column chromatography with CHCl<sub>3</sub>/MeOH (2/1) to give **14** (41 mg, 67% yield).

**methyl (1*R*,3*S*)-9-hydroxy-1-isobutyl-2,3,4,6-tetrahydro-1*H*-azepino[5,4,3-*cd*]indole-3-carboxylate (**14**).**

41 mg, 67% yield, an amorphous white powder.  $[\alpha]_D^{24} = -22.8$  ( $c = 0.10$  in MeOH). Mp: 171-173 °C (CHCl<sub>3</sub>/MeOH). IR (CHCl<sub>3</sub>): 3480, 1718 cm<sup>-1</sup>. <sup>1</sup>H-NMR (DMSO-*d*<sub>6</sub>)  $\delta$ : 1.48 (d,  $J = 6.9$  Hz, 3H), 2.79 (t,  $J = 13.7$  Hz, 1H), 3.28 (dd,  $J = 2.3, 15.5$  Hz, 1H), 3.65 (s, 3H), 3.82 (dd,  $J = 2.3, 12.0$  Hz, 1H), 4.58 (dd,  $J = 3.5, 11.5$  Hz, 1H), 6.55 (dd,  $J = 8.6$  Hz, 1H), 6.92 (d,  $J = 8.6$  Hz, 1H), 6.97 (s, 1H), 8.38 (br s, 1H), 10.50 (br s, 1H). <sup>13</sup>C-NMR (DMSO-*d*<sub>6</sub>)  $\delta$ : 21.4, 24.6, 24.7, 34.8, 40.8, 52.3, 53.3, 54.0, 109.4, 111.4, 111.8, 123.0, 124.8, 125.7, 132.2, 145.2, 175.2. HR-EI-MS  $m/z$ : Calcd for C<sub>17</sub>H<sub>22</sub>N<sub>2</sub>O<sub>3</sub> [ $M^+$ ]: 302.1630. Found 302.1637.

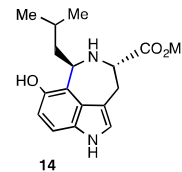

### 3. Synthesis of **20** and **21** (Table 1).

#### Acid-promoted Pictet-Spengler reaction at room temperature (entry 3):

Acetaldehyde (0.17 mL, 3 mmol) was added to a solution of tryptophan **13** (234 mg, 1 mmol) in AcOH/MeOH (1/10, v/v, 10 mL) and stirred at room temperature. After 1.5 h, the mixture was added to saturated NaHCO<sub>3</sub> solution at 0 °C, extracted with AcOEt (100 mL), washed with brine, and dried over MgSO<sub>4</sub>. The solvent was removed, and the residue was purified by silica gel column chromatography with CHCl<sub>3</sub>/MeOH (2/1) to give **20** (45 mg, 17% yield) and **21** (150 mg, 58% yield).

#### Acid-promoted Pictet-Spengler reaction at 50 °C (entry 4):

Acetaldehyde (0.17 mL, 3 mmol) was added to a solution of tryptophan **13** (234 mg, 1 mmol) in AcOH/MeOH (1/10, v/v, 10 mL) at room temperature and stirred for 1 h at 50 °C. After the mixture had cooled, the mixture was added to saturated NaHCO<sub>3</sub> solution at 0 °C, extracted with AcOEt (100 mL), washed with brine, and dried over MgSO<sub>4</sub>. The solvent was removed, and the residue was purified by silica gel column chromatography with CHCl<sub>3</sub>/MeOH (2/1) to give **20** (42 mg, 16% yield) and **21** (105 mg, 40% yield).

#### Methyl (1*R*,3*S*)-6-hydroxy-1-methyl-2,3,4,9-tetrahydro-1*H*-pyrido[3,4-*b*]indole-3-carboxylate (**16**).<sup>1</sup>

45 mg, 17% yield (entry 3, table 1), an amorphous white powder.  $[\alpha]_D^{24} = +18.2$  ( $c = 0.11$  in MeOH). Mp: 104-107 °C (CHCl<sub>3</sub>/MeOH). IR (CHCl<sub>3</sub>): 3471, 1736 cm<sup>-1</sup>. <sup>1</sup>H-NMR (DMSO-*d*<sub>6</sub>)  $\delta$ : 1.43 (d,  $J = 6.9$  Hz, 3H), 2.89 (ddd,  $J = 1.2, 6.9, 15.5$  Hz, 1H), 2.98 (ddd,  $J = 1.2, 5.5, 15.5$  Hz, 1H), 3.71 (s, 3H), 3.96 (t,  $J = 5.5$  Hz, 1H), 4.33 (q,  $J = 6.9$  Hz, 1H), 6.59 (dd,  $J = 2.3, 8.6$  Hz, 1H), 6.75 (d,  $J = 2.3$  Hz, 1H), 7.06 (d,  $J = 8.6$  Hz, 1H). <sup>13</sup>C-NMR (DMSO-*d*<sub>6</sub>)  $\delta$ : 19.7, 24.2, 45.7, 51.2, 52.3, 101.8, 104.2, 110.4, 110.9, 127.6, 131.4, 136.8, 149.9, 173.9. HR-ESI-MS  $m/z$ : Calcd for C<sub>14</sub>H<sub>17</sub>N<sub>2</sub>O<sub>3</sub> [(M+H)<sup>+</sup>]: 261.1239. Found 261.1239.

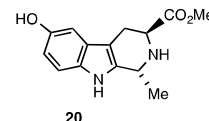

#### Methyl (1*S*,3*S*)-6-hydroxy-1-methyl-2,3,4,9-tetrahydro-1*H*-pyrido[3,4-*b*]indole-3-carboxylate (**17**).<sup>2</sup>

150 mg, 58% yield (entry 3, table 1), an amorphous white powder.  $[\alpha]_D^{24} = -54.5$  ( $c = 0.11$  in MeOH). Mp: 172-174 °C (CHCl<sub>3</sub>/MeOH). IR (CHCl<sub>3</sub>): 3472, 1735 cm<sup>-1</sup>. <sup>1</sup>H-NMR (DMSO-*d*<sub>6</sub>)  $\delta$ : 1.32 (d,  $J = 6.3$  Hz, 3H), 2.54 (ddd,  $J = 1.7, 14.9, 14.9$  Hz, 1H), 2.76 (dd,  $J = 2.9, 14.9$  Hz, 1H), 3.63 (dd,  $J = 4.0, 10.9$  Hz, 1H), 4.03 (q,  $J = 6.9$  Hz, 1H), 6.49 (dd,  $J = 2.3, 8.6$  Hz, 1H), 6.63 (d,  $J = 2.3$  Hz, 1H), 7.03 (d,  $J = 8.6$  Hz, 1H), 8.58 (br s, 1H), 10.41 (br s, 1H). <sup>13</sup>C-NMR (DMSO-*d*<sub>6</sub>)  $\delta$ : 20.5, 26.1, 48.8, 52.2, 56.7, 102.3, 105.3, 110.9, 111.8, 128.0, 130.8, 138.7, 150.8, 173.8. HR-ESI-MS  $m/z$ : Calcd for C<sub>14</sub>H<sub>16</sub>NaN<sub>2</sub>O<sub>3</sub> [(M+Na)<sup>+</sup>]: 283.1059. Found 283.1055.

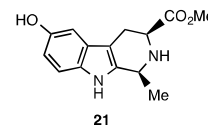

#### 4. Synthesis of 18 and 19 (Table 1).

##### Base-promoted Pictet-Spengler reactions under microwave irradiation (entry 7):

Acetaldehyde (0.17 mL, 3 mmol) was added to a solution of tryptophan **13** (234 mg, 1 mmol) in Et<sub>3</sub>N/MeOH (1/1, v/v, 10 mL) and stirred for 5 min at room temperature. Then, the mixture was heated under reflux for 6 h using microwave irradiation (50 W). After the mixture had cooled, the mixture was evaporated. The residue was purified by silica gel column chromatography with CHCl<sub>3</sub>/MeOH (2/1) to give **18** (84 mg, 32% yield) and **19** (45 mg, 17% yield).

##### Changing MeOH to EtOH (entry 8):

Acetaldehyde (0.17 mL, 3 mmol) was added to a solution of tryptophan **13** (234 mg, 1 mmol) in Et<sub>3</sub>N/EtOH (1/1, v/v, 10 mL) and stirred for 5 min at room temperature. Then, the mixture was heated under reflux for 6 h using microwave irradiation (50 W). After the mixture had cooled, the mixture was evaporated. The residue was purified by silica gel column chromatography with CHCl<sub>3</sub>/MeOH (2/1) to give **18** (45 mg, 17% yield), **19** (31 mg, 12% yield), **20** (48 mg, 18% yield), and **21** (28 mg, 11% yield).

##### Changing Et<sub>3</sub>N to *N,N*-diisopropylethylamine (entry 9):

Acetaldehyde (0.17 mL, 3 mmol) was added to a solution of tryptophan **13** (234 mg, 1 mmol) in DIEA/MeOH (1/1, v/v, 10 mL) and stirred for 5 min at room temperature. Then, the mixture was heated under reflux for 6 h using microwave irradiation (50 W). After the mixture had cooled, the mixture was evaporated. The residue was purified by silica gel column chromatography with CHCl<sub>3</sub>/MeOH (2/1) to give **18** (121 mg, 46% yield) and **19** (27 mg, 10% yield).

##### Changing 50W to 80W in microwave irradiation (entry 10):

Acetaldehyde (0.17 mL, 3 mmol) was added to a solution of tryptophan **13** (234 mg, 1 mmol) in DIEA/MeOH (1/1, v/v, 10 mL) and stirred for 5 min at room temperature. Then, the mixture was heated under reflux for 6 h using microwave irradiation (80 W). After the mixture had cooled, the mixture was evaporated. The residue was purified by silica gel column chromatography with CHCl<sub>3</sub>/MeOH (2/1) to give **18** (154 mg, 59% yield) and **19** (10 mg, 4% yield).

##### Methyl (1*R*,3*S*)-9-hydroxy-1-methyl-2,3,4,6-tetrahydro-1*H*-azepino[5,4,3-*cd*]indole-3-carboxylate (**18**).

154 mg, 59% yield (entry 10, table 1), an amorphous white powder.  $[\alpha]_D^{24} = -5.0$  ( $c = 0.49$  in MeOH). Mp: 183-185 °C (CHCl<sub>3</sub>/MeOH). IR (CHCl<sub>3</sub>): 3468, 1726, 1711 cm<sup>-1</sup>. <sup>1</sup>H-NMR (DMSO-*d*<sub>6</sub>)  $\delta$ : 1.29 (d,  $J = 6.9$  Hz, 3H), 2.82 (ddd,  $J = 1.7, 12.6, 14.9$  Hz, 1H), 3.27 (dd,  $J = 2.3, 14.9$  Hz, 1H), 3.64 (s, 3H), 3.90 (dd,  $J = 1.7, 12.6$  Hz, 1H), 4.65 (q,  $J = 6.9$  Hz, 1H), 6.57 (d,  $J = 8.6$  Hz, 1H), 6.93 (d,  $J = 8.6$  Hz, 1H), 6.98 (s, 1H), 8.41 (br s, 1H), 10.52 (br s, 1H). <sup>13</sup>C-NMR (DMSO-*d*<sub>6</sub>)  $\delta$ : 20.1, 34.7, 51.3, 52.2, 54.4, 109.5, 111.4, 111.7, 123.0, 124.9, 125.4, 132.2, 145.5, 175.1. HR-ESI-MS  $m/z$ : Calcd for C<sub>14</sub>H<sub>16</sub>NaN<sub>2</sub>O<sub>3</sub> [(M+Na)<sup>+</sup>]: 283.1059. Found 283.1056.

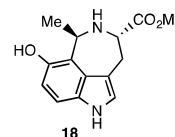

##### Methyl (1*S*,3*S*)-9-hydroxy-1-methyl-2,3,4,6-tetrahydro-1*H*-azepino[5,4,3-*cd*]indole-3-carboxylate (**19**).

10 mg, 4% yield (entry 10, table 1), an amorphous white powder.  $[\alpha]_D^{24} = -31.9$  ( $c = 0.50$  in MeOH). Mp: 80-83 °C (CHCl<sub>3</sub>/MeOH). IR (CHCl<sub>3</sub>): 3346, 1734 cm<sup>-1</sup>. <sup>1</sup>H-NMR (CDCl<sub>3</sub>)  $\delta$ : 1.61 (d,  $J = 6.3$  Hz, 3H), 3.16 (ddd,  $J = 1.7, 12.0, 15.5$  Hz, 1H), 3.36 (dd,  $J = 2.9, 14.9$  Hz, 1H), 3.77 (s, 3H), 3.86 (dd,  $J = 2.9, 12.0$  Hz, 1H), 4.65 (q,  $J = 6.3$  Hz, 1H), 6.62 (d,  $J = 8.6$  Hz, 1H), 6.95 (s, 1H), 7.03 (d,  $J = 8.0$  Hz, 1H), 7.26 (br s, 1H), 8.02 (br s, 1H). <sup>13</sup>C-NMR (CDCl<sub>3</sub>)  $\delta$ : 23.3, 34.5, 52.4, 54.1, 59.2, 109.5, 112.9, 113.0, 122.7, 124.0, 125.9, 132.6, 145.7, 175.1. HR-ESI-MS  $m/z$ : Calcd for C<sub>14</sub>H<sub>17</sub>N<sub>2</sub>O<sub>3</sub> [(M+H)<sup>+</sup>]: 261.1239. Found 261.1238.

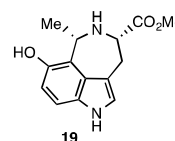

## 5. Synthesis of 3-6 (scheme 3).

**Typical procedure for hydrolysis:** 10% NaOH (0.25 mL) was added to a solution of methyl ester (0.1 mmol) in MeOH (1 mL) at room temperature, and the mixture was stirred at room temperature. After 15 min or 30 min, oxalic acid•2H<sub>2</sub>O (63 mg, 0.5 mmol) was added to the mixture and stirred for 10 min at room temperature. The mixture was passed through Celite and the residue was washed with MeOH. The solvent was removed, and the residue was purified by silica gel column chromatography with CHCl<sub>3</sub>/MeOH (2/1) to give the carboxylic acid.

### Hyrtioreticuline C (3).<sup>3</sup>

According to the typical procedure for hydrolysis, **3** (18 mg, 72% yield) was obtained as an amorphous white powder.

18 mg, 72% yield, an amorphous white powder.  $[\alpha]_D^{24} = -86.4$  ( $c = 0.10$  in MeOH). Mp: 230-232 °C (CHCl<sub>3</sub>/MeOH). IR (CHCl<sub>3</sub>): 3466, 1710 cm<sup>-1</sup>. <sup>1</sup>H-NMR (DMSO-*d*<sub>6</sub>)  $\delta$ : 1.41 (d,  $J = 6.9$  Hz, 3H), 2.87 (dd,  $J = 12.6, 16.1$  Hz, 1H), 3.61 (dd,  $J = 2.9, 16.7$  Hz, 1H), 3.75 (dd,  $J = 2.9, 12.6$  Hz, 1H), 5.10 (q,  $J = 6.9$  Hz, 1H), 6.68 (d,  $J = 8.6$  Hz, 1H), 7.09 (d,  $J = 8.6$  Hz, 1H), 7.10 (s, 1H), 8.90 (br s, 2H), 10.71 (br s, 1H). <sup>13</sup>C-NMR (DMSO-*d*<sub>6</sub>)  $\delta$ : 17.1, 29.4, 51.8, 56.6, 110.6, 111.4, 111.7, 116.0, 123.6, 124.7, 132.0, 146.4, 169.7. HR-ESI-MS  $m/z$ : Calcd for C<sub>13</sub>H<sub>14</sub>NaN<sub>2</sub>O<sub>3</sub> [(M+Na)<sup>+</sup>]: 269.0902. Found 269.0901.

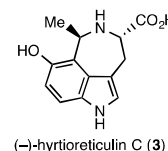

### Hyrtioreticuline C (3).

Adding TFA (1 drop) into NMR tube, then <sup>1</sup>H and <sup>13</sup>C-NMR experiments were performed. Adding TFA (1  $\mu$ L) into optical rotation cell, then specific rotation experiment was performed.

$[\alpha]_D^{24} = -60.5$  ( $c = 0.10$  in MeOH-TFA). <sup>1</sup>H-NMR (DMSO-*d*<sub>6</sub> + TFA)  $\delta$ : 1.48 (d,  $J = 6.9$  Hz, 3H), 3.12 (dd,  $J = 13.2, 15.5$  Hz, 1H), 3.60 (dd,  $J = 2.9, 16.6$  Hz, 1H), 4.60 (d,  $J = 11.5$  Hz, 1H), 5.11 (q,  $J = 6.9$  Hz, 1H), 6.71 (d,  $J = 8.6$  Hz, 1H), 7.15 (d,  $J = 8.6$  Hz, 1H), 7.21 (s, 1H), 9.19 (br s, 2H), 9.86 (br s, 1H), 10.97 (br s, 1H). <sup>13</sup>C-NMR (DMSO-*d*<sub>6</sub> + TFA)  $\delta$ : 16.9, 29.0, 53.2, 54.5, 107.8, 111.8, 112.0, 114.1, 124.0, 124.4, 131.6, 146.6, 171.9.

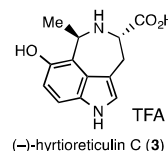

### Hyrtioreticuline D (4).<sup>3</sup>

According to the typical procedure for hydrolysis, **4** (17 mg, 70% yield) was obtained as an amorphous white powder.

17 mg, 70% yield, an amorphous white powder.  $[\alpha]_D^{24} = +14.0$  ( $c = 0.55$  in MeOH). Mp: 228-231 °C (CHCl<sub>3</sub>/MeOH). IR (CHCl<sub>3</sub>): 3447, 1710 cm<sup>-1</sup>. <sup>1</sup>H-NMR (DMSO-*d*<sub>6</sub>)  $\delta$ : 1.56 (d,  $J = 6.9$  Hz, 3H), 3.14 (dd,  $J = 13.2, 15.5$  Hz, 1H), 3.39 (dd,  $J = 4.0, 16.6$  Hz, 1H), 3.53 (dd,  $J = 4.0, 13.2$  Hz, 1H), 5.07 (q,  $J = 6.3$  Hz, 1H), 6.65 (d,  $J = 9.2$  Hz, 1H), 7.08 (d,  $J = 9.2$  Hz, 1H), 7.12 (s, 1H), 8.96 (br s, 1H), 9.01 (br s, 1H), 10.69 (br s, 1H). <sup>13</sup>C-NMR (DMSO-*d*<sub>6</sub>)  $\delta$ : 21.8, 27.8, 50.9, 62.5, 111.0, 112.0, 112.2, 115.0, 123.5, 126.2, 131.6, 146.8, 170.0. HR-ESI-MS  $m/z$ : Calcd for C<sub>13</sub>H<sub>15</sub>N<sub>2</sub>O<sub>3</sub> [(M+H)<sup>+</sup>]: 247.1083. Found 247.1083.

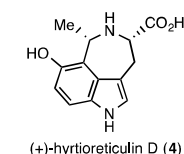

### Hyrtioreticuline D (4).

Adding TFA (1 drop) into NMR tube, then <sup>1</sup>H and <sup>13</sup>C-NMR experiments were performed. Adding TFA (1  $\mu$ L) into optical rotation cell, then specific rotation experiment was performed.

$[\alpha]_D^{24} = +24.0$  ( $c = 0.10$  in MeOH-TFA). <sup>1</sup>H-NMR (DMSO-*d*<sub>6</sub> + TFA)  $\delta$ : 1.62 (d,  $J = 7.4$  Hz, 3H), 3.42 (d,  $J = 8.1$  Hz, 2H), 4.43 (m, 1H), 5.09 (m, 1H), 6.69 (d,  $J = 8.6$  Hz, 1H), 7.13 (d,  $J = 8.6$  Hz, 1H), 7.20 (d,  $J = 2.3$  Hz, 1H), 8.96 (br s, 1H), 9.58 (br s, 1H), 10.85 (br s, 1H). <sup>13</sup>C-NMR (DMSO-*d*<sub>6</sub> + TFA)  $\delta$ : 21.0, 27.5, 52.9, 59.5, 108.5, 112.3, 112.4, 114.0, 124.3, 125.6, 131.5, 147.1, 171.6.

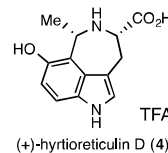

### Hyrtioreticulin E (5).<sup>1-3</sup>

According to the typical procedure for hydrolysis, **5** (23 mg, 93% yield) was obtained as an amorphous white powder.

23 mg, 93% yield, an amorphous white powder.  $[\alpha]_D^{24} = -47.9$  ( $c = 0.11$  in MeOH). Mp: 236–239 °C (CHCl<sub>3</sub>/MeOH). IR (CHCl<sub>3</sub>): 3446, 1668, 1658 cm<sup>-1</sup>. <sup>1</sup>H-NMR (DMSO-*d*<sub>6</sub>)  $\delta$ : 1.51 (d,  $J = 6.9$  Hz, 3H), 2.82 (dd,  $J = 8.0, 15.5$  Hz, 1H), 2.97 (dd,  $J = 5.7, 16.1$  Hz, 1H), 3.71 (dd,  $J = 5.7, 8.0$  Hz, 1H), 4.55 (q,  $J = 6.3$  Hz, 1H), 6.55 (dd,  $J = 2.3, 8.6$  Hz, 1H), 6.70 (d,  $J = 1.7$  Hz, 1H), 7.06 (d,  $J = 8.6$  Hz, 1H), 8.82 (br s, 1H), 10.65 (br s, 1H). <sup>13</sup>C-NMR (DMSO-*d*<sub>6</sub>)  $\delta$ : 18.7, 23.2, 47.2, 53.4, 102.6, 105.2, 112.0, 112.1, 127.3, 131.1, 133.1, 151.1, 170.1. HR-ESI-MS  $m/z$ : Calcd for C<sub>13</sub>H<sub>14</sub>NaN<sub>2</sub>O<sub>3</sub> [(M+Na)<sup>+</sup>]: 269.0902. Found 269.0904.

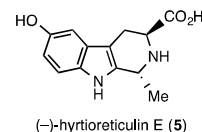

### Hyrtioreticuline E (5).

Adding TFA (1 drop) into NMR tube, then <sup>1</sup>H and <sup>13</sup>C-NMR experiments were performed. Adding TFA (1  $\mu$ L) into optical rotation cell, then specific rotation experiment was performed.

$[\alpha]_D^{24} = -8.8$  ( $c = 0.11$  in MeOH-TFA). <sup>1</sup>H-NMR (DMSO-*d*<sub>6</sub> + TFA)  $\delta$ : 1.61 (d,  $J = 6.9$  Hz, 3H), 2.98 (dd,  $J = 8.0, 16.0$  Hz, 1H), 3.16 (dd,  $J = 5.2, 17.2$  Hz, 1H), 4.55 (t,  $J = 6.0$  Hz, 1H), 4.73 (q,  $J = 6.9$  Hz, 1H), 6.61 (dd,  $J = 2.3, 8.6$  Hz, 1H), 6.74 (d,  $J = 2.3$  Hz, 1H), 7.11 (d,  $J = 8.6$  Hz, 1H), 9.52 (br s, 1H), 9.80 (br s, 1H), 10.72 (br s, 1H). <sup>13</sup>C-NMR (DMSO-*d*<sub>6</sub> + TFA)  $\delta$ : 18.4, 22.4, 47.9, 51.5, 102.7, 103.3, 112.3, 112.6, 126.8, 131.1, 131.8, 151.1, 170.9.

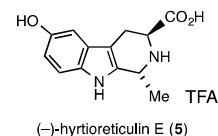

### Hyrtiorectine B (6).<sup>3,4</sup>

According to the typical procedure for hydrolysis, **6** (22 mg, 91% yield) was obtained as an amorphous white powder. Adding TFA (1  $\mu$ L) into optical rotation cell, then specific rotation experiment was performed due to its insolubility in MeOH  $\{[\alpha]_D^{24} = 0$  ( $c = 0.11$  in MeOH)}.

22 mg, 91% yield, an amorphous white powder.  $[\alpha]_D^{24} = -69.8$  ( $c = 0.11$  in MeOH-TFA). Mp: 264–266 °C (CHCl<sub>3</sub>/MeOH). IR (CHCl<sub>3</sub>): 3446, 1681 cm<sup>-1</sup>. <sup>1</sup>H-NMR (DMSO-*d*<sub>6</sub>)  $\delta$ : 1.54 (d,  $J = 6.9$  Hz, 3H), 2.66 (m, 1H), 3.01 (dd,  $J = 5.2, 16.1$  Hz, 1H), 3.55 (dd,  $J = 4.6, 12.0$  Hz, 1H), 4.43 (q,  $J = 6.9$  Hz, 1H), 6.56 (dd,  $J = 2.3, 8.6$  Hz, 1H), 6.70 (d,  $J = 2.3$  Hz, 1H), 7.08 (d,  $J = 8.6$  Hz, 1H), 8.78 (br s, 1H), 10.75 (br s, 1H). <sup>13</sup>C-NMR (DMSO-*d*<sub>6</sub>)  $\delta$ : 17.4, 23.8, 49.7, 58.2, 102.6, 106.4, 112.0, 112.1, 127.3, 131.3, 132.9, 151.2, 170.0. HR-ESI-MS  $m/z$ : Calcd for C<sub>13</sub>H<sub>14</sub>NaN<sub>2</sub>O<sub>3</sub> [(M+Na)<sup>+</sup>]: 269.0902. Found 269.0900.

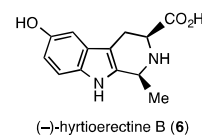

## References

- (1) Brossi, A.; Focella, A.; Teitel, S. *J. Med. Chem.* **1973**, *16*, 418–420.
- (2) Teital, S.; Brossi, A. *Lloydia* **1974**, *37*, 196–211.
- (3) Yamanokuchi, R.; Imada, K.; Miyazaki, M.; Kato, H.; Watanabe, T.; Fujimuro, M.; Saeki, Y.; Yoshinaga, S.; Terasawa, H.; Iwasaki, N.; Rotinsulu, H.; Losung, F.; Mangindaan, R. E. P.; Namikoshi, M.; de Voogd, N. J.; Yokosawa, H.; Tsukamoto, S. *Bioorg. Med. Chem.* **2012**, *20*, 4437–4442.
- (4) Youssef, D. T. A. *J. Nat. Prod.* **2005**, *68*, 1416–1419.

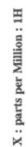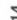

```

=====
File Name      = JMS-16-12-15-e_3df
Experiment     = single_pulse.exe
Sample_id      = 5842280
Date_ Acq     = 15-DEC-2016 13:36:14
Creation_time  = 15-DEC-2016 13:54:15
Revision_time  = 15-DEC-2016 13:56:07
Current_time   =
Content        = single_pulse
Data_format    = 1D COMPLEX
Dir_title      = 1507
Dir_units      = [ppm]
Dir_extensions =
Site           = ECA 500
Spectrometer   = DELTA2_NMR
Field_strength = 11.42426421[T] (500MHz)
X_acq_duration = 1.76422912[s]
X_domain       = 1H
X_offset       = 13.191398[MHz]
X_points       = 512
X_resolution   = 16384
X_sweep        = 0.5668198[Hz]
X_tr_domain    = 485.13191398[MHz]
X_tr_offset    = 5[ppm]
X_tr_domain    = 1H
X_tr_offset    = 13.191398[MHz]
X_tr_domain    = 5[ppm]
X_tr_offset    = 5[ppm]
X_tr_domain    = FALSE
X_tr_offset    = 64
Total_scans    = 64
X_90_width     = 12.7[us]
X_acq_time     = 1.76422912[s]
X_angle        = 45[deg]
X_tr_delay     = 6.31[us]
X_pulse        = Off[us]
X_tr_mode      = Off
X_tr_delay     = 1[s]
Initial_wait   = 36
Rever_gain     = 36
Rever_delay    = 6.76422912[s]
Repetition_time = 20.4[sec]
Temp_get       =
=====

```

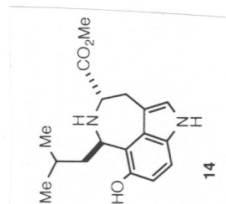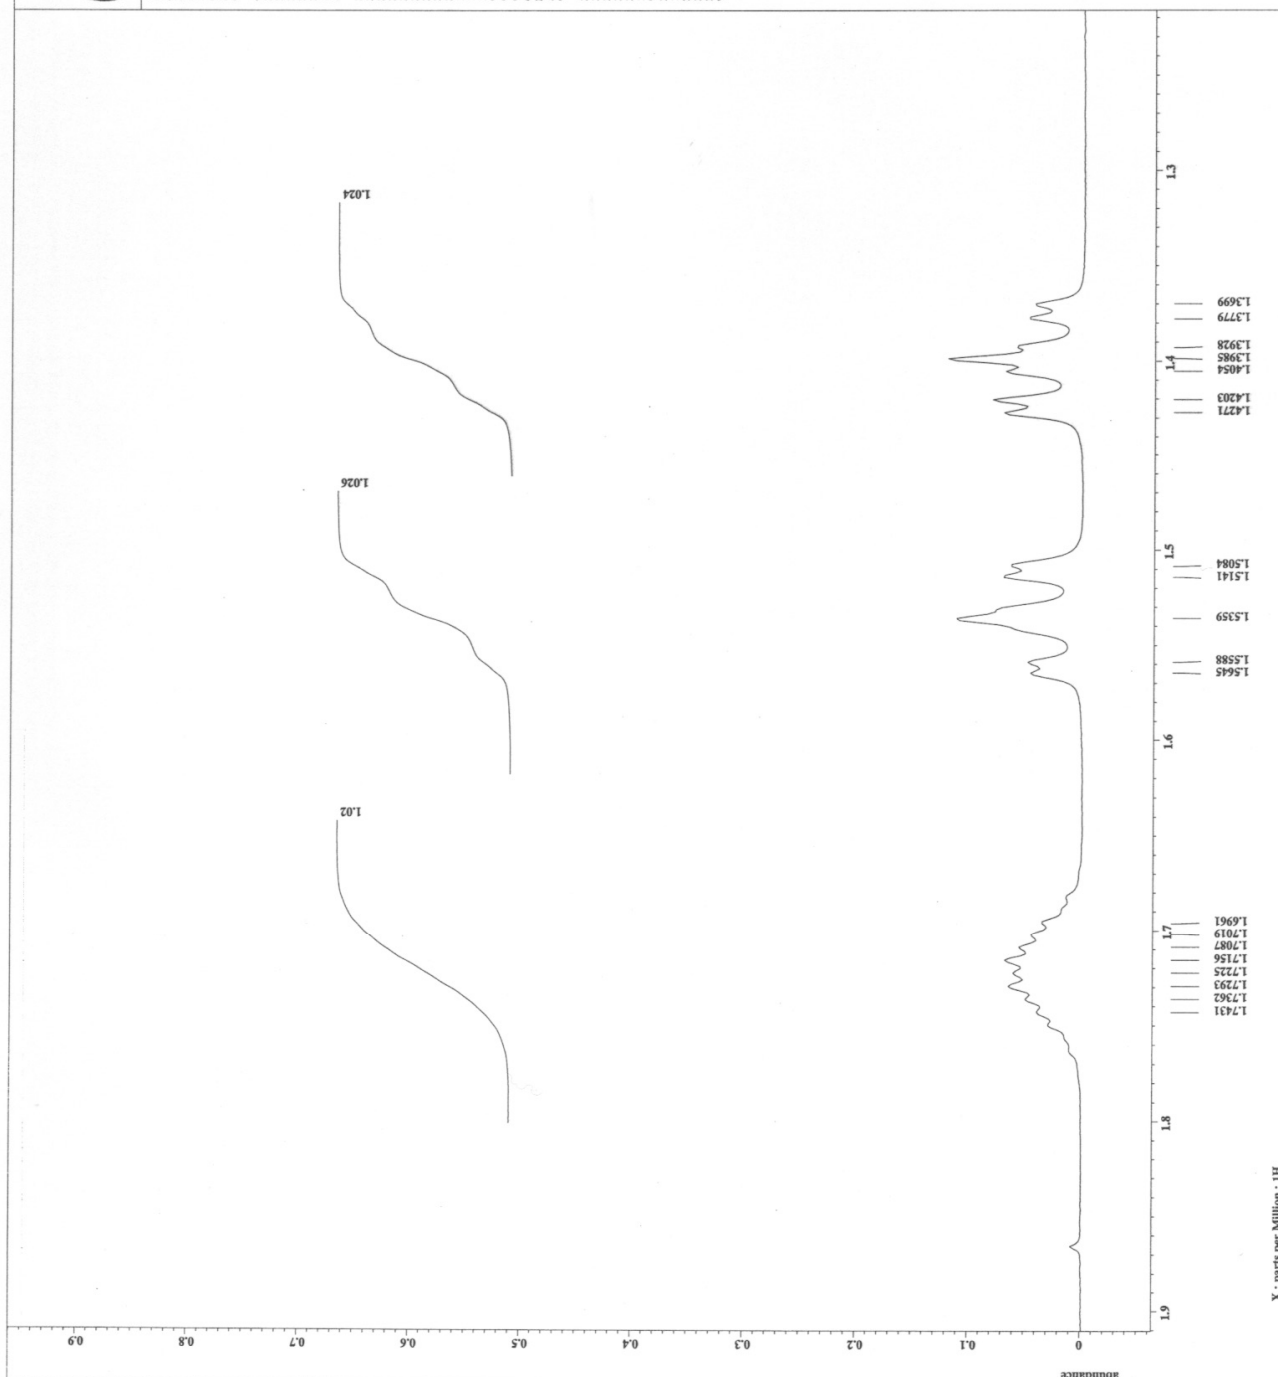

X : parts per Million : 1H

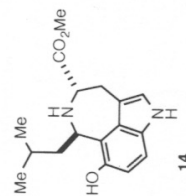



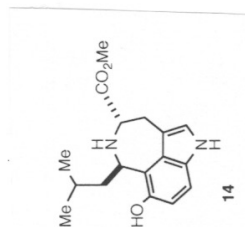

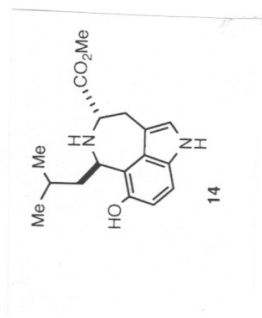

[illegible]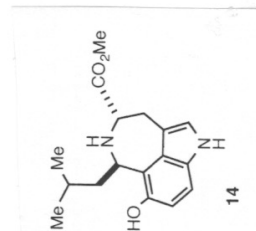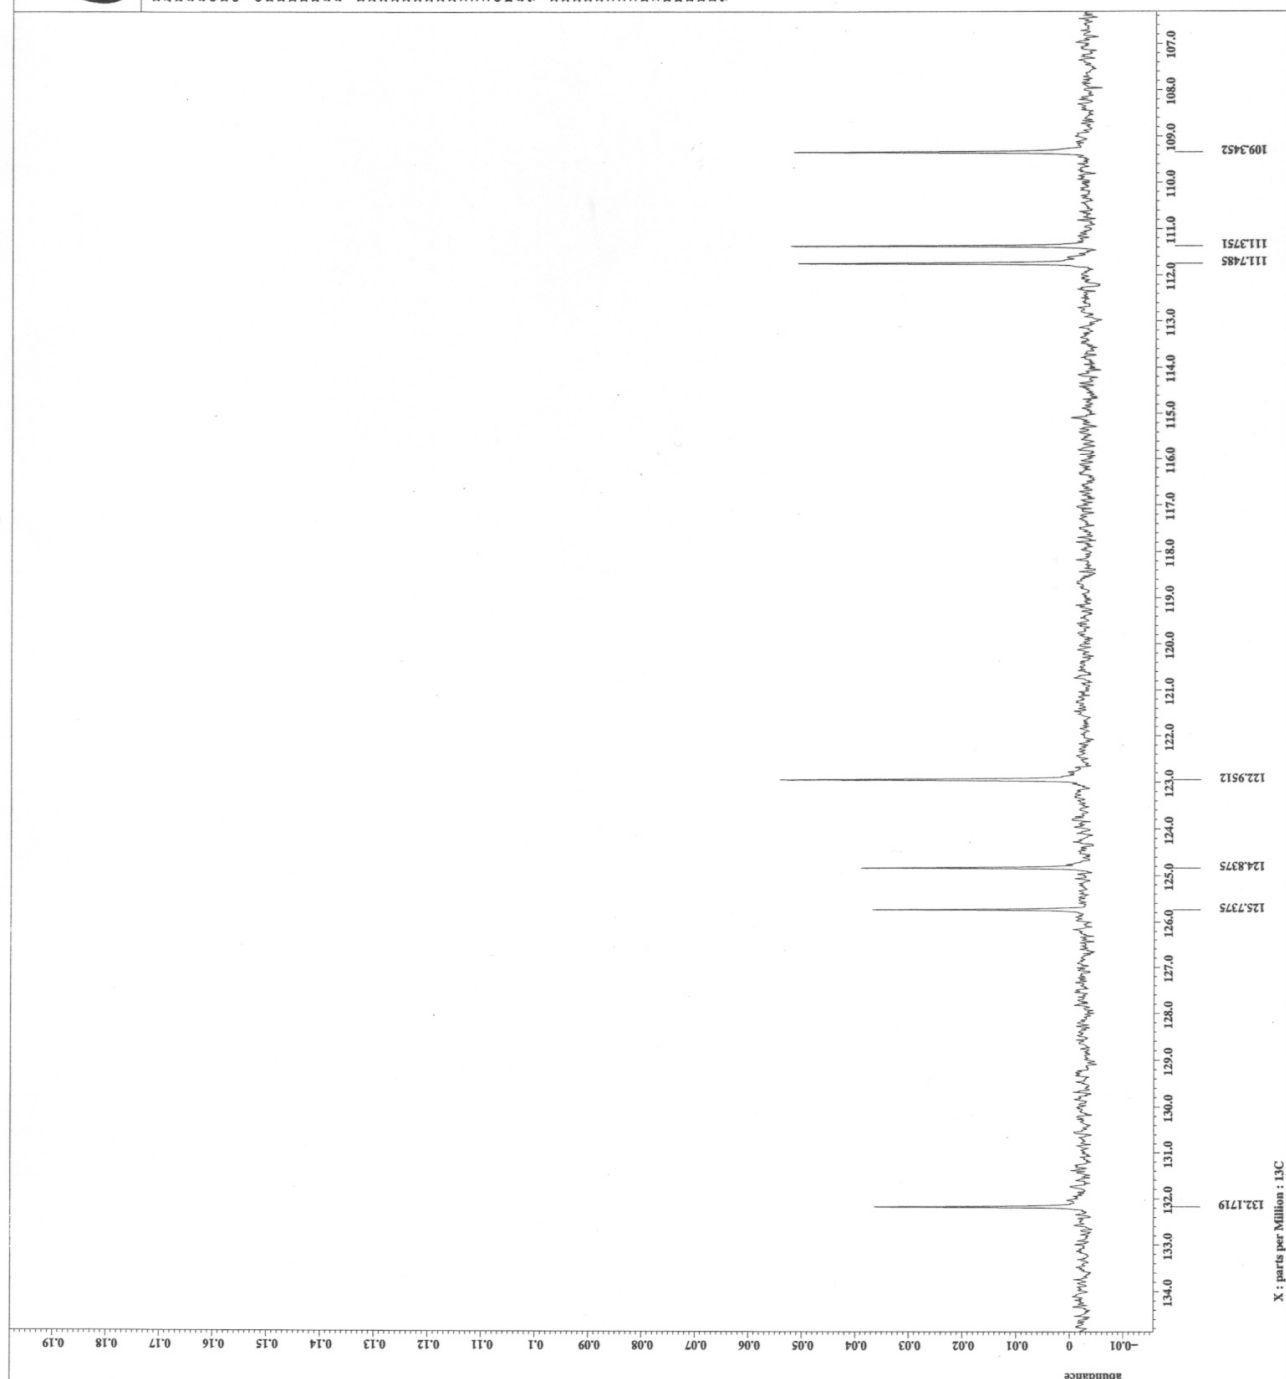

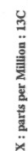



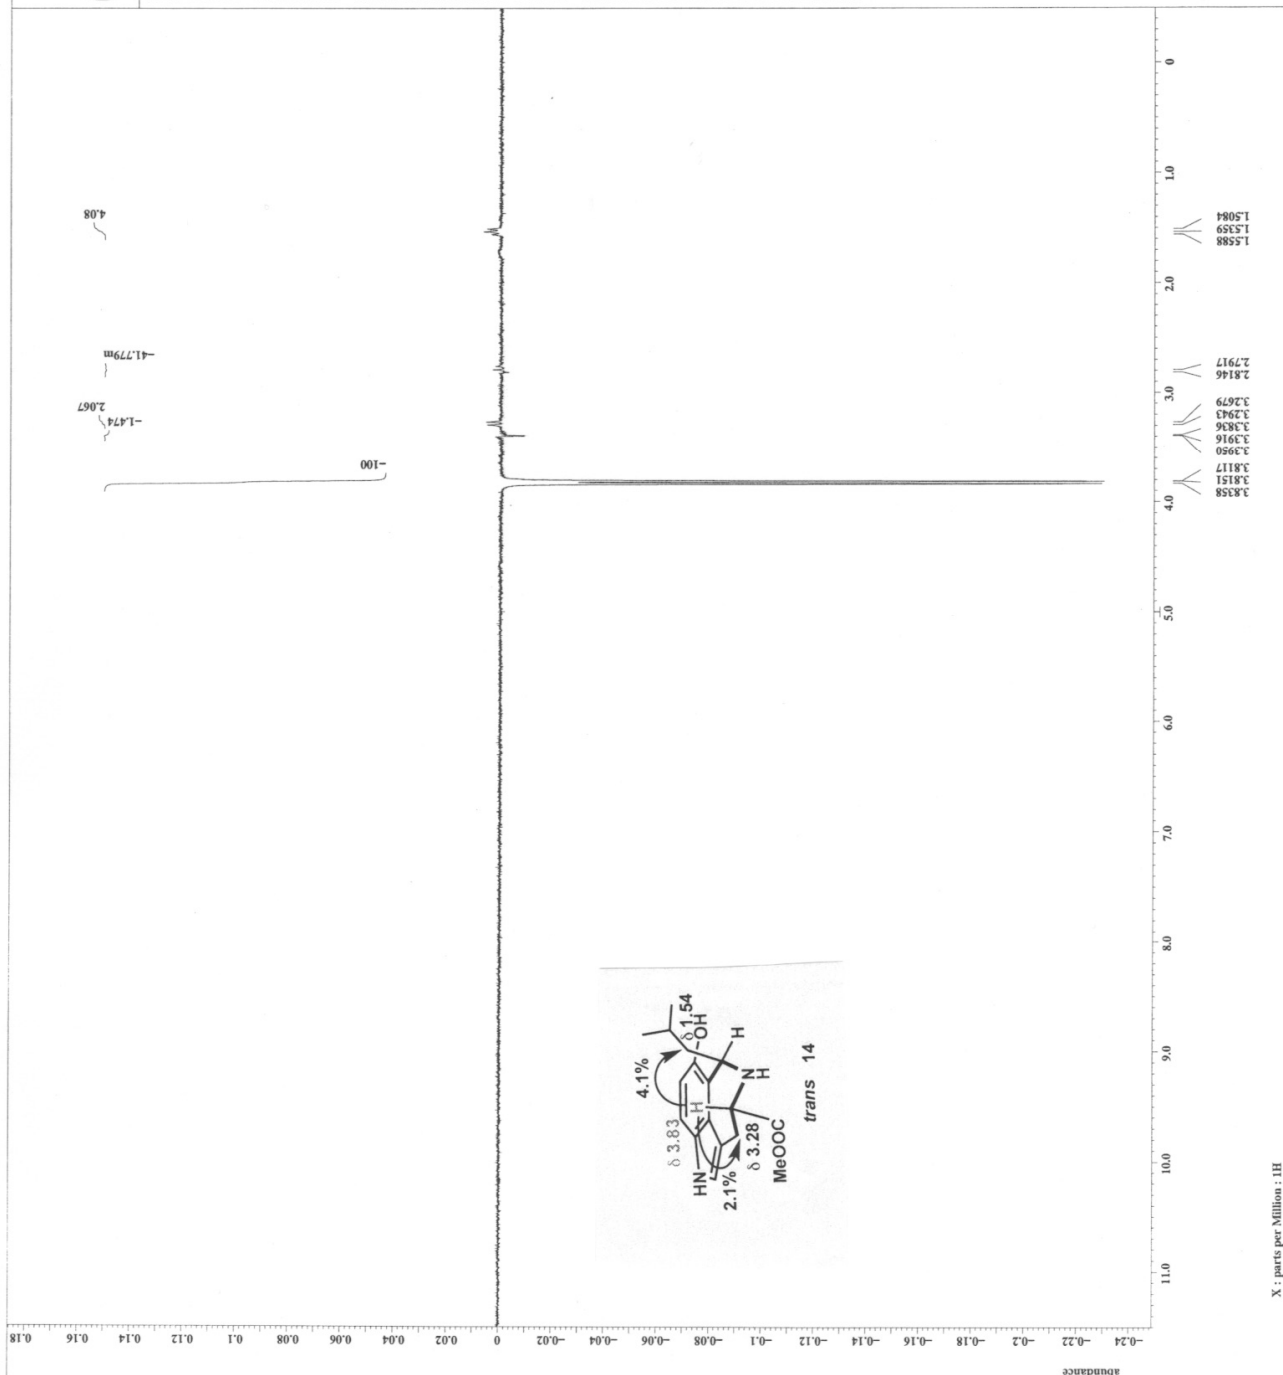

```

----- PROCESSING PARAMETERS
dc_balance : 0 : FALSE
freq       : 0.0[Hz]
semp       : 0.0[s]
trapzold3 : 0[%] : 80[%]
zerofill   : 1
fft        : 1 : TRUE : TRUE
machinephase
ppm
Derived from: yama-16-12-10-11.jdr

```

Derived from: yama-16-12-10-11.jdf

```

Filename      = data_16-12-10-14_3d1
Author        =
Experiment     = S18F873_pulse_exs2
Solvent        = CHLOROFORM-D
Creation_time  = 11-DEC-2016 09:12:09
Curation_time = 11-DEC-2016 10:12:09
Current_time   = 11-DEC-2016 10:12:15

=====
Name          = single_pulse
Command       = d16 COMPLEX
Data_format   = 13107
Pulse         = 13107
P1            = 1W
P2            = 1W
P3            = 1W
P4            = 1W
P5            = 1W
P6            = 1W
P7            = 1W
P8            = 1W
P9            = 1W
P10           = 1W
P11           = 1W
P12           = 1W
P13           = 1W
P14           = 1W
P15           = 1W
P16           = 1W
P17           = 1W
P18           = 1W
P19           = 1W
P20           = 1W
P21           = 1W
P22           = 1W
P23           = 1W
P24           = 1W
P25           = 1W
P26           = 1W
P27           = 1W
P28           = 1W
P29           = 1W
P30           = 1W
P31           = 1W
P32           = 1W
P33           = 1W
P34           = 1W
P35           = 1W
P36           = 1W
P37           = 1W
P38           = 1W
P39           = 1W
P40           = 1W
P41           = 1W
P42           = 1W
P43           = 1W
P44           = 1W
P45           = 1W
P46           = 1W
P47           = 1W
P48           = 1W
P49           = 1W
P50           = 1W
P51           = 1W
P52           = 1W
P53           = 1W
P54           = 1W
P55           = 1W
P56           = 1W
P57           = 1W
P58           = 1W
P59           = 1W
P60           = 1W
P61           = 1W
P62           = 1W
P63           = 1W
P64           = 1W
P65           = 1W
P66           = 1W
P67           = 1W
P68           = 1W
P69           = 1W
P70           = 1W
P71           = 1W
P72           = 1W
P73           = 1W
P74           = 1W
P75           = 1W
P76           = 1W
P77           = 1W
P78           = 1W
P79           = 1W
P80           = 1W
P81           = 1W
P82           = 1W
P83           = 1W
P84           = 1W
P85           = 1W
P86           = 1W
P87           = 1W
P88           = 1W
P89           = 1W
P90           = 1W
P91           = 1W
P92           = 1W
P93           = 1W
P94           = 1W
P95           = 1W
P96           = 1W
P97           = 1W
P98           = 1W
P99           = 1W
P100          = 1W
P101          = 1W
P102          = 1W
P103          = 1W
P104          = 1W
P105          = 1W
P106          = 1W
P107          = 1W
P108          = 1W
P109          = 1W
P110          = 1W
P111          = 1W
P112          = 1W
P113          = 1W
P114          = 1W
P115          = 1W
P116          = 1W
P117          = 1W
P118          = 1W
P119          = 1W
P120          = 1W
P121          = 1W
P122          = 1W
P123          = 1W
P124          = 1W
P125          = 1W
P126          = 1W
P127          = 1W
P128          = 1W
P129          = 1W
P130          = 1W
P131          = 1W
P132          = 1W
P133          = 1W
P134          = 1W
P135          = 1W
P136          = 1W
P137          = 1W
P138          = 1W
P139          = 1W
P140          = 1W
P141          = 1W
P142          = 1W
P143          = 1W
P144          = 1W
P145          = 1W
P146          = 1W
P147          = 1W
P148          = 1W
P149          = 1W
P150          = 1W
P151          = 1W
P152          = 1W
P153          = 1W
P154          = 1W
P155          = 1W
P156          = 1W
P157          = 1W
P158          = 1W
P159          = 1W
P160          = 1W
P161          = 1W
P162          = 1W
P163          = 1W
P164          = 1W
P165          = 1W
P166          = 1W
P167          = 1W
P168          = 1W
P169          = 1W
P170          = 1W
P171          = 1W
P172          = 1W
P173          = 1W
P174          = 1W
P175          = 1W
P176          = 1W
P177          = 1W
P178          = 1W
P179          = 1W
P180          = 1W
P181          = 1W
P182          = 1W
P183          = 1W
P184          = 1W
P185          = 1W
P186          = 1W
P187          = 1W
P188          = 1W
P189          = 1W
P190          = 1W
P191          = 1W
P192          = 1W
P193          = 1W
P194          = 1W
P195          = 1W
P196          = 1W
P197          = 1W
P198          = 1W
P199          = 1W
P200          = 1W
P201          = 1W
P202          = 1W
P203          = 1W
P204          = 1W
P205          = 1W
P206          = 1W
P207          = 1W
P208          = 1W
P209          = 1W
P210          = 1W
P211          = 1W
P212          = 1W
P213          = 1W
P214          = 1W
P215          = 1W
P216          = 1W
P217          = 1W
P218          = 1W
P219          = 1W
P220          = 1W
P221          = 1W
P222          = 1W
P223          = 1W
P224          = 1W
P225          = 1W
P226          = 1W
P227          = 1W
P228          = 1W
P229          = 1W
P230          = 1W
P231          = 1W
P232          = 1W
P233          = 1W
P234          = 1W
P235          = 1W
P236          = 1W
P237          = 1W
P238          = 1W
P239          = 1W
P240          = 1W
P241          = 1W
P242          = 1W
P243          = 1W
P244          = 1W
P245          = 1W
P246          = 1W
P247          = 1W
P248          = 1W
P249          = 1W
P250          = 1W
P251          = 1W
P252          = 1W
P253          = 1W
P254          = 1W
P255          = 1W
P256          = 1W
P257          = 1W
P258          = 1W
P259          = 1W
P260          = 1W
P261          = 1W
P262          = 1W
P263          = 1W
P264          = 1W
P265          = 1W
P266          = 1W
P267          = 1W
P268          = 1W
P269          = 1W
P270          = 1W
P271          = 1W
P272          = 1W
P273          = 1W
P274          = 1W
P275          = 1W
P276          = 1W
P277          = 1W
P278          = 1W
P279          = 1W
P280          = 1W
P281          = 1W
P282          = 1W
P283          = 1W
P284          = 1W
P285          = 1W
P286          = 1W
P287          = 1W
P288          = 1W
P289          = 1W
P290          = 1W
P291          = 1W
P292          = 1W
P293          = 1W
P294          = 1W
P295          = 1W
P296          = 1W
P297          = 1W
P298          = 1W
P299          = 1W
P300          = 1W
P301          = 1W
P302          = 1W
P303          = 1W
P304          = 1W
P305          = 1W
P306          = 1W
P307          = 1W
P308          = 1W
P309          = 1W
P310          = 1W
P311          = 1W
P312          = 1W
P313          = 1W
P314          = 1W
P315          = 1W
P316          = 1W
P317          = 1W
P318          = 1W
P319          = 1W
P320          = 1W
P321          = 1W
P322          = 1W
P323          = 1W
P324          = 1W
P325          = 1W
P326          = 1W
P327          = 1W
P328          = 1W
P329          = 1W
P330          = 1W
P331          = 1W
P332          = 1W
P333          = 1W
P334          = 1W
P335          = 1W
P336          = 1W
P337          = 1W
P338          = 1W
P339          = 1W
P340          = 1W
P341          = 1W
P342          = 1W
P343          = 1W
P344          = 1W
P345          = 1W
P346          = 1W
P347          = 1W
P348          = 1W
P349          = 1W
P350          = 1W
P351          = 1W
P352          = 1W
P353          = 1W
P354          = 1W
P355          = 1W
P356          = 1W
P357          = 1W
P358          = 1W
P359          = 1W
P360          = 1W
P361          = 1W
P362          = 1W
P363          = 1W
P364          = 1W
P365          = 1W
P366          = 1W
P367          = 1W
P368          = 1W
P369          = 1W
P370          = 1W
P371          = 1W
P372          = 1W
P373          = 1W
P374          = 1W
P375          = 1W
P376          = 1W
P377          = 1W
P378          = 1W
P379          = 1W
P380          = 1W
P381          = 1W
P382          = 1W
P383          = 1W
P384          = 1W
P385          = 1W
P386          = 1W
P387          = 1W
P388          = 1W
P389          = 1W
P390          = 1W
P391          = 1W
P392          = 1W
P393          = 1W
P394          = 1W
P395          = 1W
P396          = 1W
P397          = 1W
P398          = 1W
P399          = 1W
P400          = 1W
P401          = 1W
P402          = 1W
P403          = 1W
P404          = 1W

```

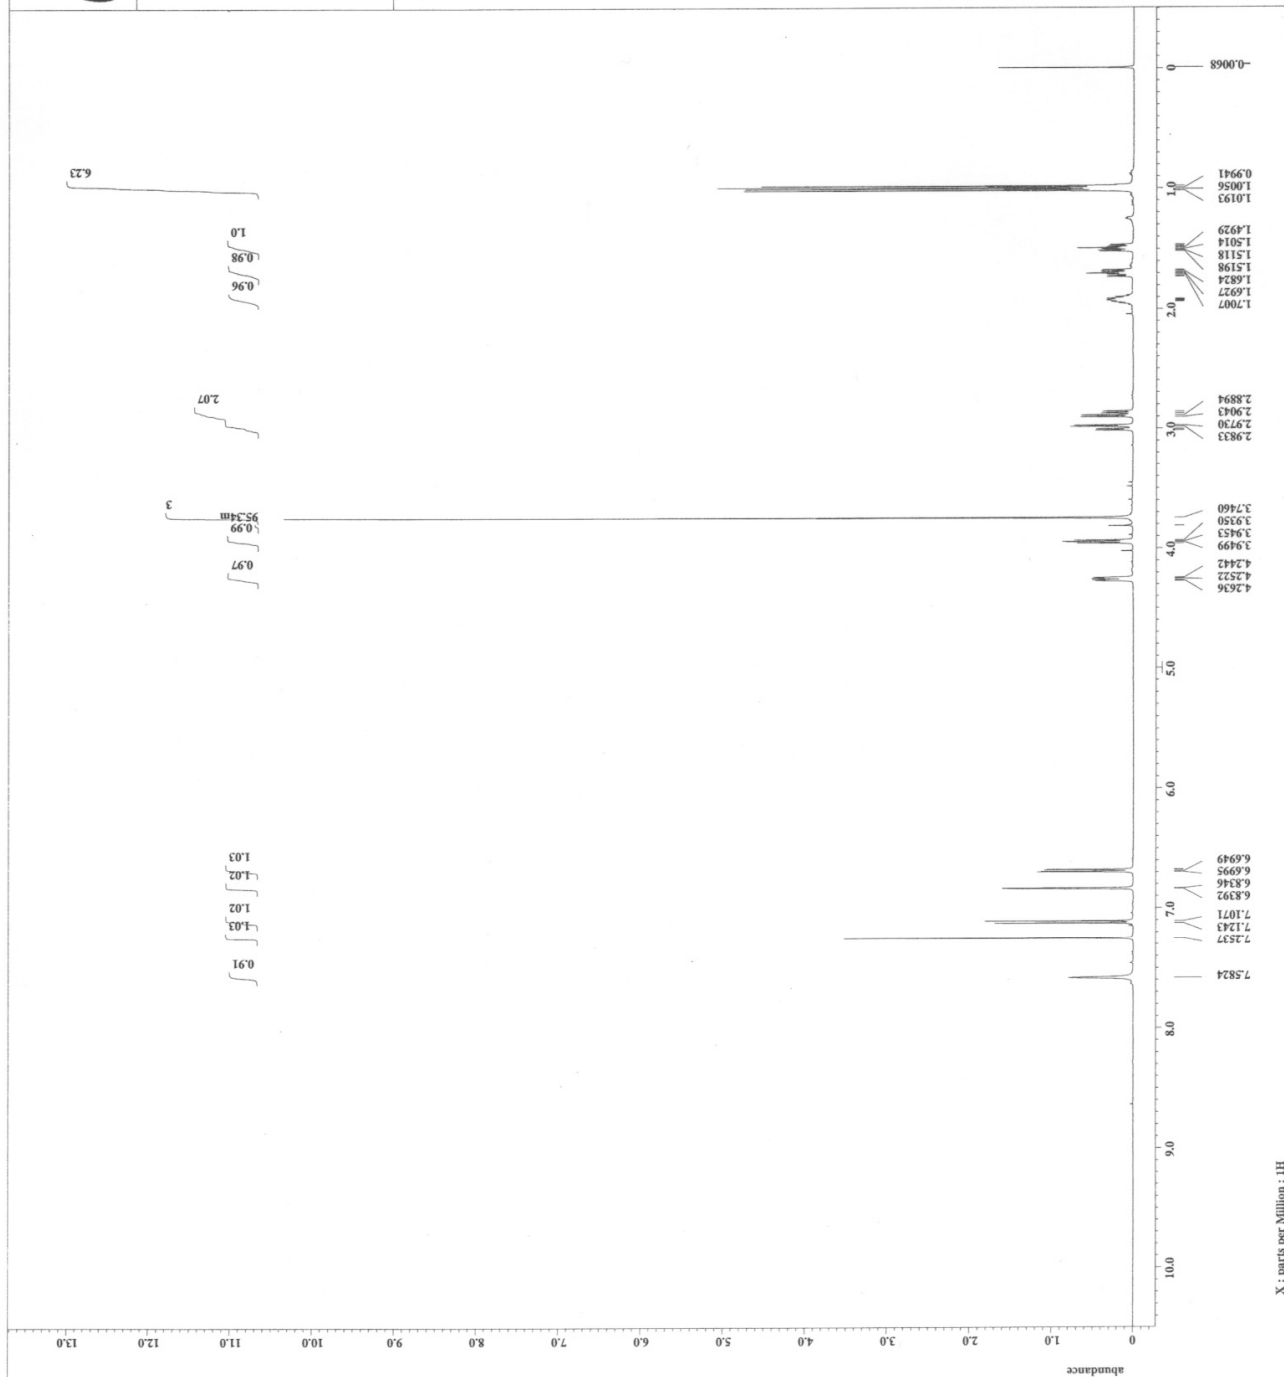

X : parts per Million : 1H

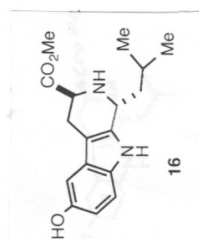

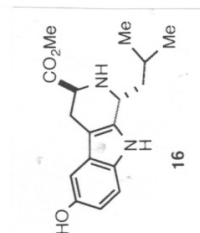



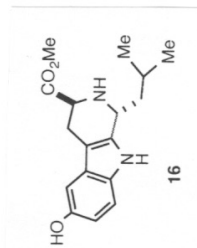

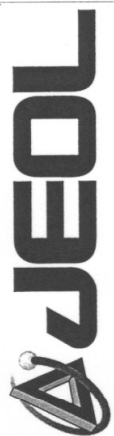

----- PROCESSING PARAMETERS -----  
Date\_ymd : 2016-12-11  
trapezoid3 : 0.2 [Hz] : 0.0 [s]  
Chemical shift : 1.0000000000000000  
fft : 1 : TRUE : TRUE  
machinephase  
ppm  
Derived from: yuma-16-12-10-11.jdf

Filename = yuma-16-12-10-14.jdf  
Author = delta  
Experiment = 481687\_pulse.sw2  
Date\_ymd = 2016-12-10  
Solvent = CHLOROFORM-D  
Creation\_time = 11-DEC-2016 09:12:05  
Current\_time = 11-DEC-2016 10:22:20  
Comment = single pulse  
Data\_format = 1D COMPLEX  
Dir\_name = 13207  
Dir\_unit = [s]  
Dimensions = X  
F2 = 500  
Spectrometer = DEPTA2\_NMR  
Pulse\_program = 11-74387904 [s]  
X\_domain = 1H : 500.1321 [MHz]  
X\_freq = 500.1321 [MHz]  
X\_points = 16384  
X\_resolution = 0.57277737 [Hz]  
X\_sweep = 9.38438438 [MHz]  
Irr\_domain = 1H : 159.91521 [MHz]  
Irr\_freq = 159.91521 [MHz]  
Irr\_offset = 5.0 [ppm]  
Tr\_domain = 1H : 159.91521 [MHz]  
Tr\_freq = 159.91521 [MHz]  
Tr\_offset = 5.0 [ppm]  
Clipped = FALSE  
Data\_return = 1  
Scan = 8  
Total\_scans = 8  
X\_90\_width = 11.8 [us]  
X\_acq\_time = 1.74387904 [s]  
X\_angle = 4.5 [deg]  
X\_p1 = 5.0 [us]  
X\_p2 = 5.9 [us]  
Irr\_p1 = OFF  
Irr\_p2 = OFF  
Data\_preset = FALSE  
Initial\_wait = 1 [s]  
Acquire\_delay = 5.0 [s]  
Relaxation\_delay = 5 [s]  
Repetition\_time = 6.74387904 [s]  
Temp\_get = 22.4 [degC]

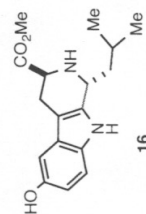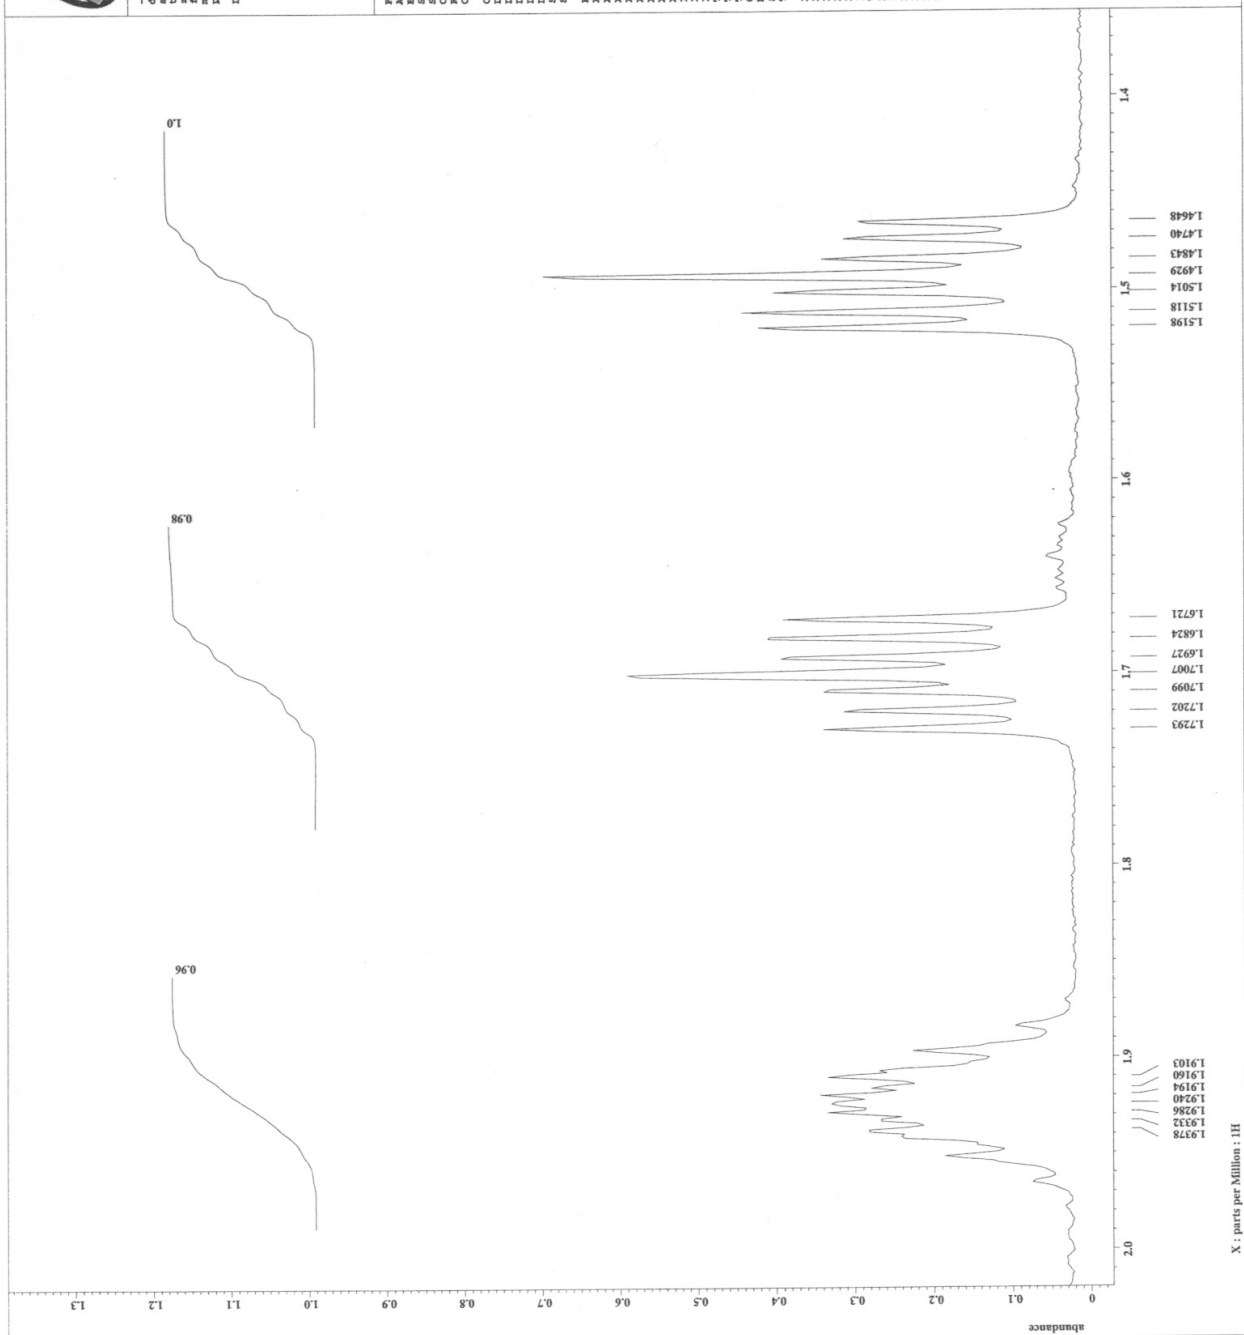

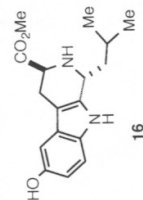

--- PROCESSING PARAMETERS ---  
 acb : 1  
 sedp : 2.0 [Hz] : 0.0 [s]  
 traspcid3 : 0 [%] : 80 [%] : 100 [%]  
 traspcid4 : 0 [%] : 80 [%] : 100 [%]  
 fft : 1 : TRUE : TRUE  
 machinephase  
 ppm  
 Derived from: yama-16-12-10-12-jdf

File name : yama-16-12-10-14-jdf  
 Author :  
 Experiment :  
 Sample\_id :  
 Solvent : CHLOROFORM-D  
 Creation\_time : 12-DEC-2016 02:04:59  
 Revision\_time : 12-DEC-2016 07:10:55  
 Current\_time : 12-DEC-2016 07:12:14  
 Comment :  
 Data\_processing :  
 Dia\_time :  
 Dia\_title :  
 Dia\_file :  
 Dimensions :  
 Site :  
 Spectrometer : ECA500  
 Field\_strength : 11.7473579 [T] (500 [MH])  
 X\_acq\_duration : 0.83362792 [s]  
 X\_acq\_time : 0.83362792 [s]  
 X\_freq : 125.76529768 [MHz]  
 X\_offset : 10.0 [ppm]  
 X\_resolution : 4  
 X\_resolution : 1.19959034 [Hz]  
 X\_sweep : 39.3081761 [MHz]  
 X\_freq : 500.15991521 [MHz]  
 X\_offset : 5.0 [ppm]  
 X\_pulse : 1  
 Mod\_return : 26496  
 Total\_scans : 26496  
 X\_90\_width : 11.3 [us]  
 X\_acq\_time : 0.83362792 [s]  
 X\_delay : 5.5 [s]  
 X\_atn : 5.5 [dB]  
 X\_pulse\_dec : 3.7666667 [us]  
 X\_acq\_time : 21.238 [s]  
 X\_atn\_dec : 21.238 [dB]  
 X\_noise : VALTZ  
 Decoupling : 1  
 Modulation : 1  
 Noe : TRUE  
 Noe\_time : 2 [s]  
 Relaxation\_delay : 2 [s]  
 Repetition\_time : 2.83362792 [s]  
 Temp\_get : 23.3 [C]

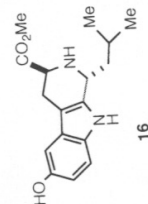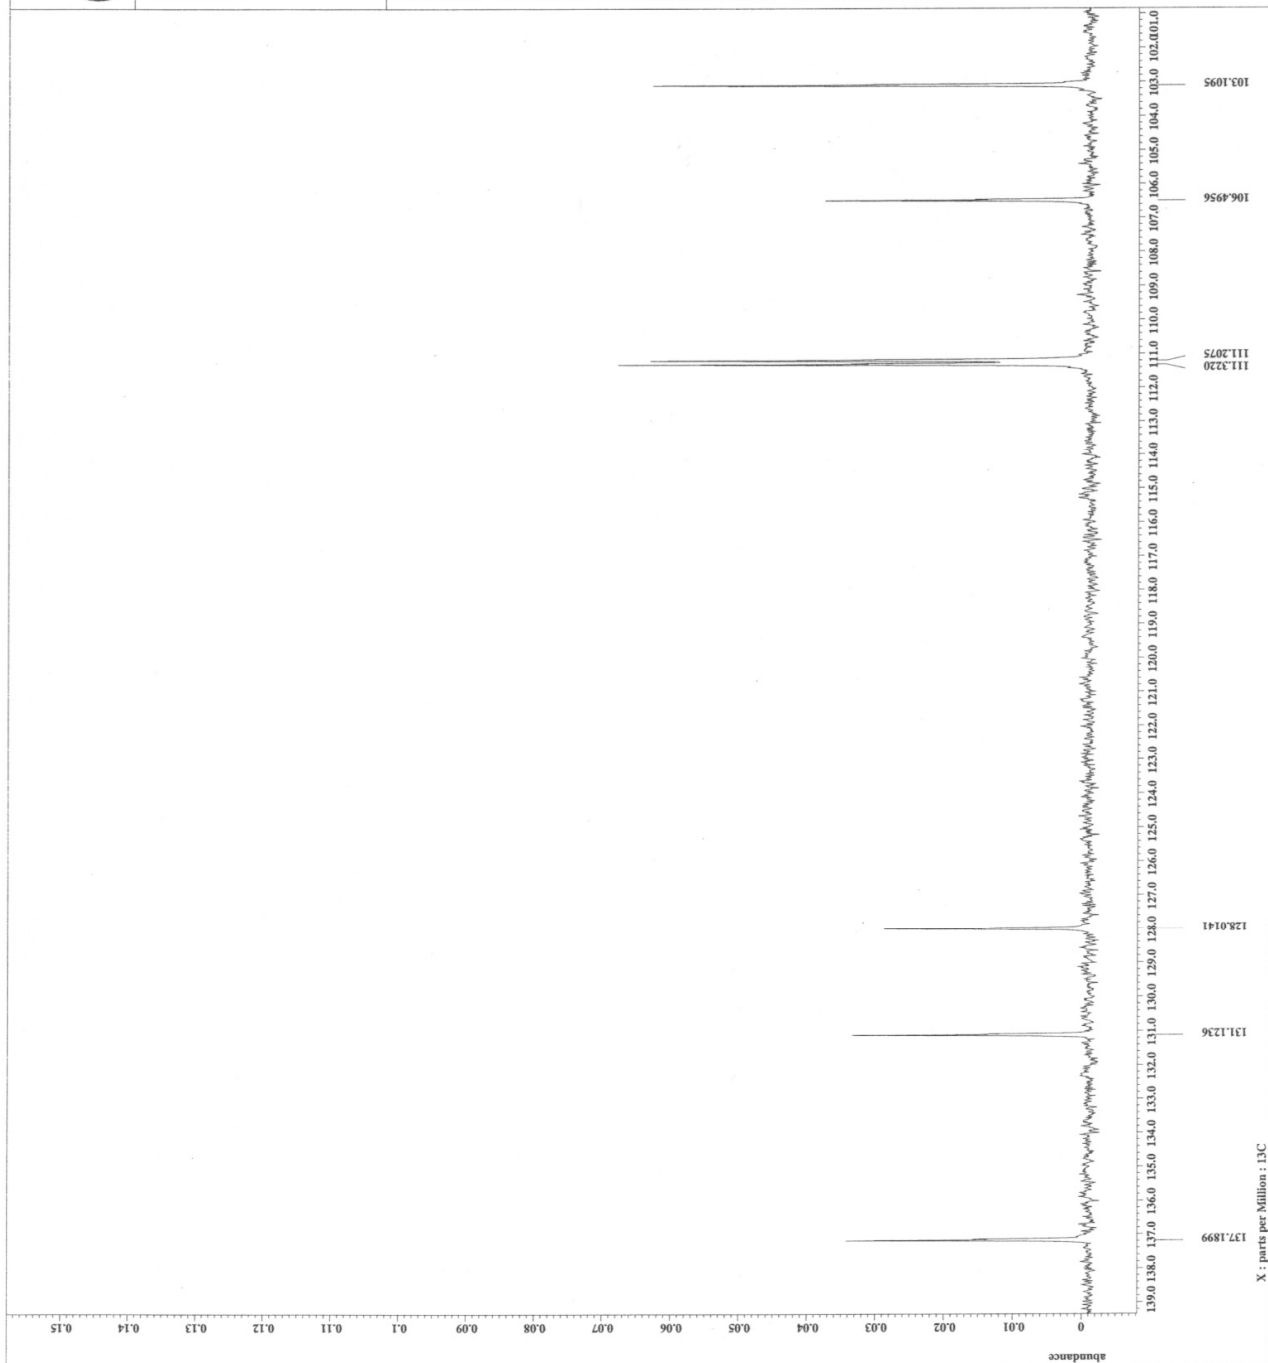

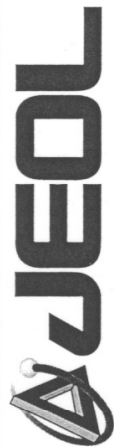

--- PROCESSING PARAMETERS ---  
ac balance 0 : FALSE  
sweep 0 : 0.2[Hz] : 0.0[s]  
xresol 0.3 : 0[N] : 80[N] : 100[N]  
fft 1 : TRUE : TRUE  
ppm  
Phase : 164 : 0 : 50[N]  
Derived from: yama-16-12-20-trans-3.jdr

Filename = yama-16-12-20-trans-1  
Filepath =  
Experiment = noe\_1d\_dpfgae.ex  
Sample\_id = yama  
Acq\_date = 20-DEC-2016 18:13:52  
Creation\_time = 21-DEC-2016 07:35:42  
Revision\_time = 21-DEC-2016 07:35:50  
Current\_time =  
Comment = DFGSE NOE 1d  
Data\_format = 1D COMPLEX  
F2\_id = 11.07  
Dim\_title = [ppm]  
Dim\_units = [ppm]  
Dimensions = 2  
Spectrometer = DELTA2\_MMR  
Field\_strength = 11.7413579[G] (500[MH]  
X\_acq\_duration = 1.74567904[s]  
X\_domain = 1H  
X\_freq = 500.13991521[MHz]  
X\_offset = 0.00000000[ppm]  
X\_points = 16384  
X\_resolution = 2.5727737[Hz]  
X\_sweep = 9.38438436[MHz]  
X\_center = 500.13991521[MHz]  
Irr\_domain = 1H  
Irr\_freq = 500.13991521[MHz]  
Irr\_offset = 0.00000000[ppm]  
Tri\_domain = 1H  
Tri\_freq = 500.13991521[MHz]  
Tri\_offset = 0.00000000[ppm]  
Clipped = FALSE  
Mod\_return = 1  
Gain = 1648  
TOTAL\_scans = 2048  
X\_acq\_time = 1.74567904[s]  
X\_pulse = 11.8[us]  
Irr\_mode = Off  
Obs\_sol = 80  
Obs\_sol\_atn = 54.23[dB]  
Obs\_sol\_offset = 4.0238[ppm]  
Obs\_sol\_shape = G0089  
Obs\_sol\_sfp = 0.00000000[ppm]  
Tri\_mode = Off  
Data\_preset = FALSE  
Grat\_1\_amp = 60[mV/m]  
Grat\_1\_freq = 1[Hz]  
Grat\_2\_amp = 10[mV/m]  
Grat\_2\_freq = 30[mV/m]  
Grat\_3\_amp = 0.1[Hz]  
Grat\_3\_freq = 0.1[Hz]  
Grat\_recover = 1[s]  
Initial\_wait = 1[s]  
Mix\_time = 0.5[s]  
Rever\_gain = 7.0  
Rever\_gain\_delay = 7.0  
Repetition\_time = 8.74567904[s]  
Temp\_get = 22.4[degC]

1.93  
2.0  
0.52  
1.88  
0.49  
75.88mm

-100

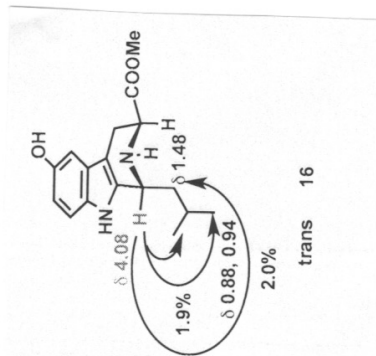

0.8773  
0.9133  
0.9323  
0.9449  
1.4602  
1.4751  
1.4900  
1.5037  
1.8553  
1.8691  
1.8828  
2.5951  
3.3005  
3.6006  
4.0243  
4.0701  
4.0827  
4.0976  
5.0  
6.0  
7.0  
8.0  
9.0  
10.0  
11.0

X : parts per Million : 1H

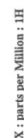

----- PROCESSING PARAMETERS -----  
 dc\_balance : 0 : FALSE  
 mag : 0.2 [Hz], 0.0 [s]  
 zascfill : 1  
 f1 : 1 : TRUE : TRUE  
 phase : 164 : 0 : 50 [%]  
 Derived from: yama-16-12-20-trans-5.jcf

Filename = yama-16-12-20-trans-9  
 Author = Delta  
 Experiment = nmr\_id\_obfgee.ex  
 Name = DMSO-D6  
 Solvent = DMSO-D6  
 Creation\_time = 20-DEC-2016 23:31:22  
 Start\_time = 20-DEC-2016 23:31:22  
 Current\_time = 21-DEC-2016 07:31:37  
 Comment = NMR of trans-16  
 Data\_dir = 1107  
 Dim\_size = 1H  
 Dimensions = 1 (ppm)  
 Site = ECA500  
 Spectrometer = DELTA 500  
 Field\_strength = 11.7473579 [T] (500 [MHz])  
 X\_acq\_duration = 1.74587904 [s]  
 X\_acq\_time = 1.74587904 [s]  
 X\_freq = 500.15991521 [MHz]  
 X\_offset = 5.0 [ppm]  
 X\_resolution = 2.6384  
 X\_resolution = 0.5277737 [Hz]  
 X\_sweep = 9.38438438 [kHz]  
 X\_center = 500.15991521 [MHz]  
 X1\_freq = 5.0 [ppm]  
 X2\_freq = 500.15991521 [MHz]  
 X1\_offset = FALSE  
 X2\_offset = FALSE  
 Clipped = FALSE  
 Scans = 2048  
 Total\_scans = 2048  
 X\_acq\_time = 1.74587904 [s]  
 X\_atn = 3.4 [dB]  
 X\_pulse = 21.0 [us]  
 Obs\_sel\_180 = 20 [ms]  
 Obs\_sel\_atn = 54.235 [dB]  
 Obs\_sel\_offset = 3.7976 [ppm]  
 Obs\_sel\_phase = 3.7976 [ppm]  
 Tri\_mode = Off  
 Grad1\_presat = 1 [ms]  
 Grad1\_amp = 60 [Hz/m]  
 Grad2\_presat = 1 [ms]  
 Grad2\_amp = 90 [Hz/m]  
 Grad3\_presat = 1 [ms]  
 Grad3\_amp = 30 [Hz/m]  
 Grad4\_presat = 1 [ms]  
 Grad4\_amp = 30 [Hz/m]  
 Grad\_shape = SINC  
 Initial\_wait = 1 [s]  
 Mix\_time = 5.0 [s]  
 Relaxation\_delay = 7 [s]  
 Repetition\_time = 8.74587904 [s]  
 Temp\_set = 22.4 [C]

0.16 0.23 0.31 2.88 0.19 1.39 0.34

100

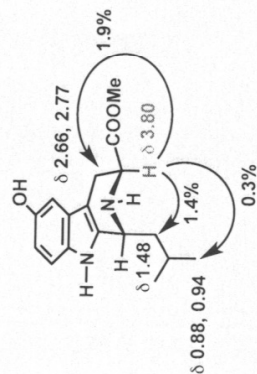

trans 16

4.0833 3.8079 3.7850 3.6750 3.6006 3.4517 3.3005 2.7760 2.7451 2.6684 2.6409 1.8805 1.8679 1.5037 1.4900 1.4763 1.4591 0.9449 0.8922 0.8785

X : parts per Million : 1H

```
dc_balance : 0 : FALSE
semp : 0.2[Hz] : 0.0[s]
trapezoid3 : 0[%] : 80[%] : 100[%]
zerofill : 1
zfc : 1 : TRUE : TRUE
ppm
phase : -196 : 0 : 50[%]
```

Derived from: yama-16-12-20-trans-5.jdf

```

# Yema-16-12-20-trans=
# Data
# no_id_offset.exe
# Yema-D6
# 20-DEC-2016 23:31:22
# 21-DEC-2016 13:50:49
# 22-DEC-2016 13:50:49
# DPGFOS NOE ID
# 13107
# 1K
# [ppm]
# KAI500
# DELTA_MNR
# 11.7473579(4) (500) MHz
# 1.74587904(s)
# 130.15894521[MHz]
# 5.0[ppm]
# 16384
# 0.52727737[Hz]
# 9.38438843[MHz]
# 18.15894521[MHz]
# 5.0[ppm]
# 1K
# 500.15894521[MHz]
# FALSE
# 1.646
# 2648
# 1.74587904(s)
# 11.8[sus]
# Off
# Off
# 5.231[D3]
# 3.7976[ppm]
# GAUSS
# 0.52727737[ppm]
# Off
# FALSE
# 1[sus]/m
# 1[sus]/m
# 90[deg/m]
# 30[deg/m]
# 0.1[sus]
# SINE
# Mix time = 0.5[s]
# 50
# Recv_gain
# Relaxation delay = 1.74587904[s]
# 22.4[s]
# Time_per

```

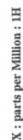



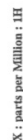

Derived from: yama-16-12-12-1.1ddf

[illegible]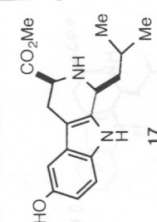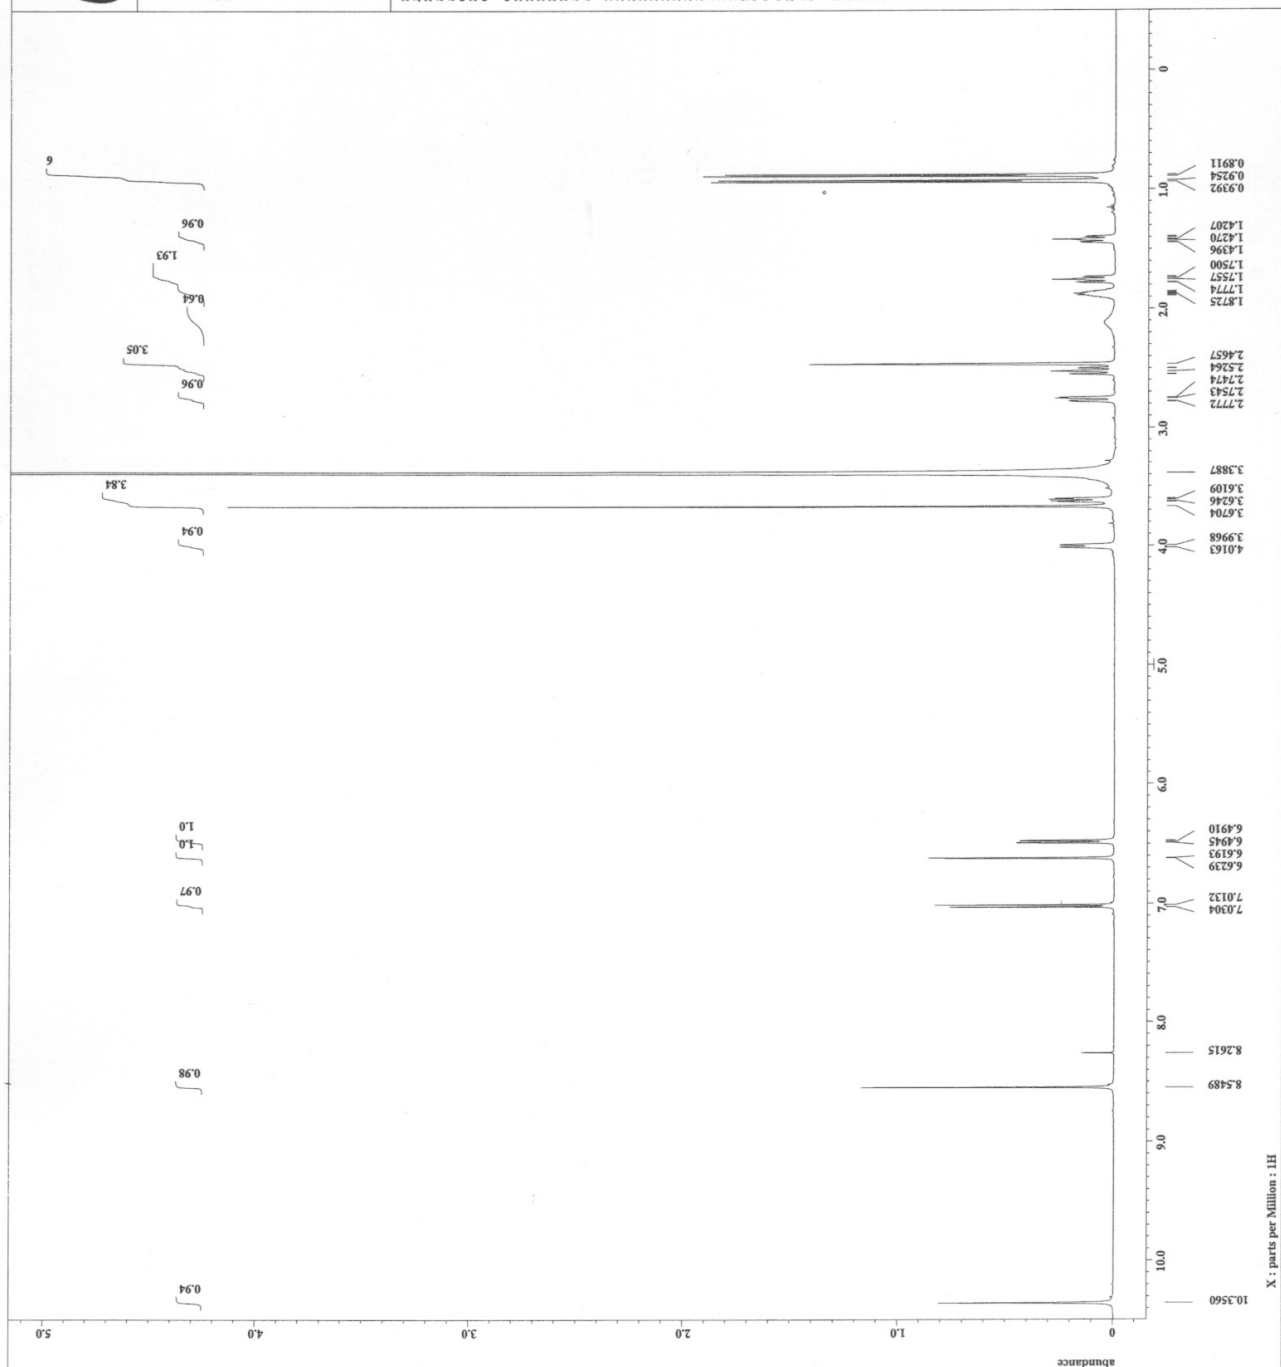

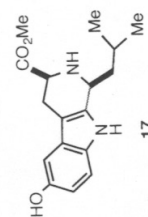

----- PROCESSING PARAMETERS -----

```

dc balance : 0 : FALSE
sexp : 0.2[Hz] : 0.0[s]
trapezoid3 : 0[%] : 80[%] : 100[%]
zerofill : 1
fft : 1 : TRUE
machinephase
ppm

```

Derived from: yama-16-12-12-1-1.jdf

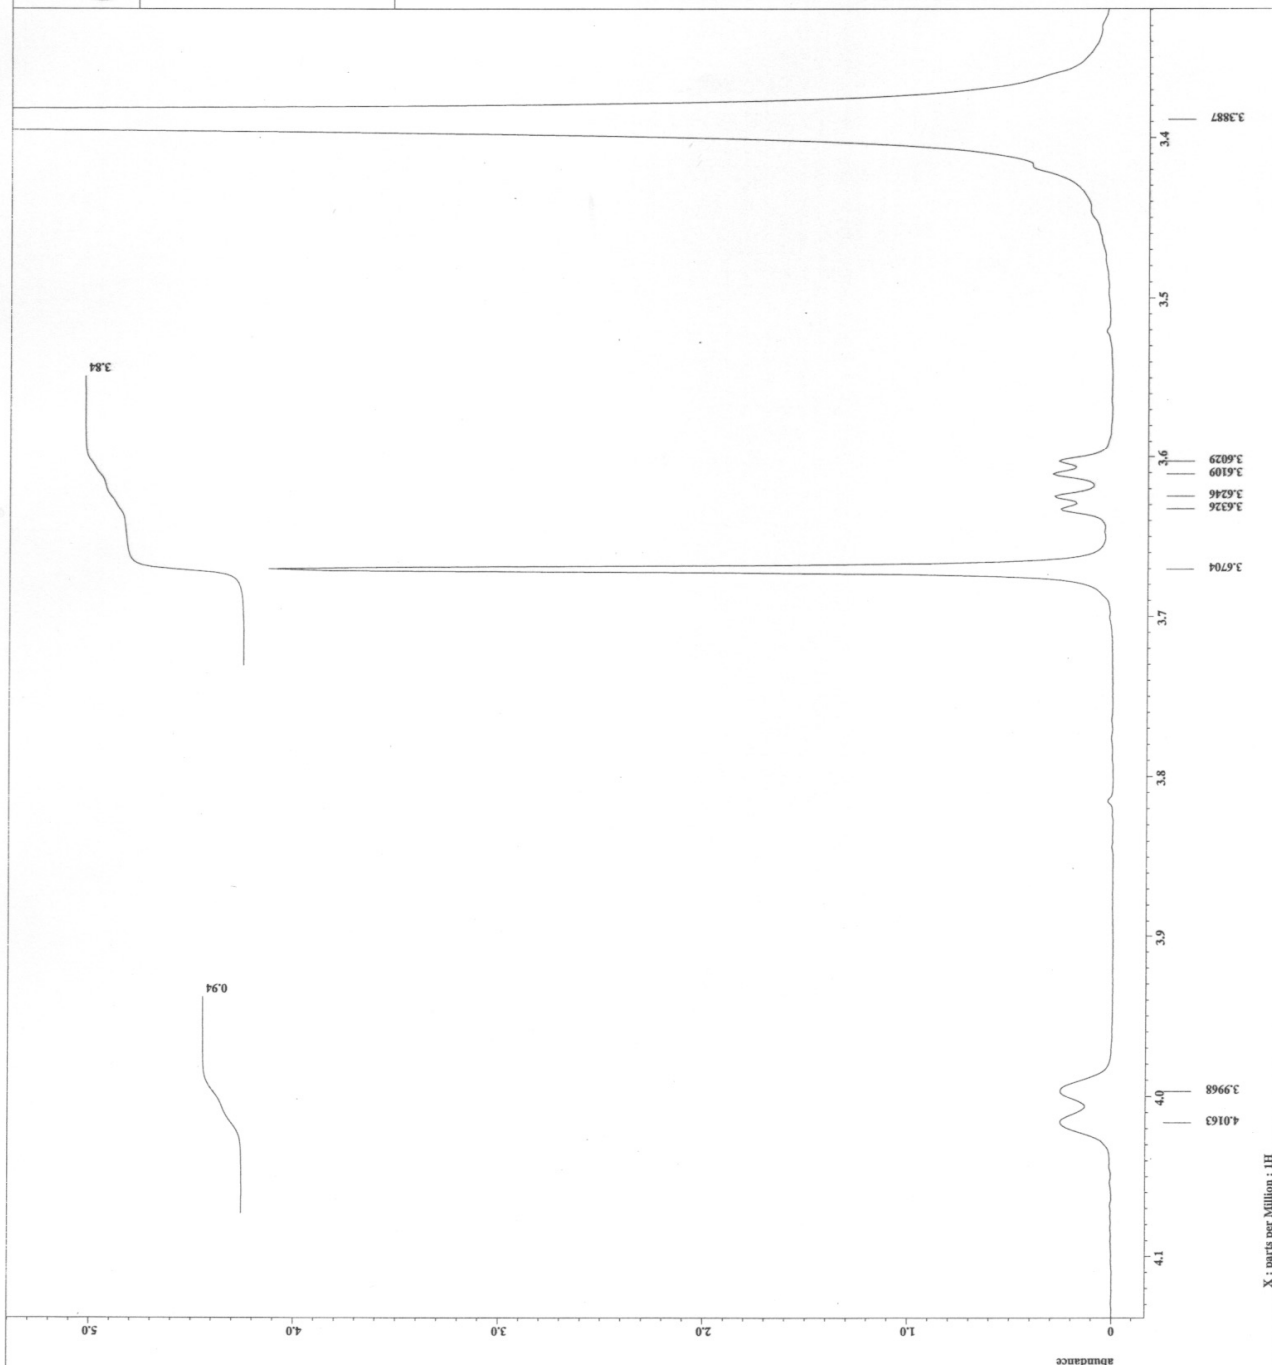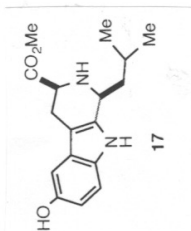

X : parts per Million : 1H

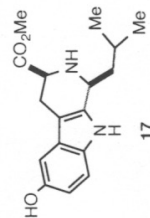

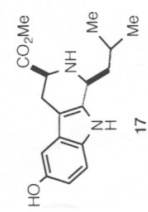

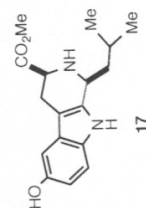

X : parts per Million : 13C

Derived from: yama-16-12-12-2.jdf

```
Relaxation_delay = 2[s]
Repetition_time = 2.83361792[s]
Temp_get = 23.6[dc]
```

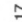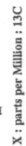





Filename = yama-16-12-20-cis-10.  
 Author = delta  
 Experiment = noe\_1d\_dpfgmh.ex  
 Solvent = DMSO-D6  
 Creation\_time = 21-DEC-2016 04:40:15  
 Acquisition\_time = 21-DEC-2016 07:17:13  
 Current\_time = 21-DEC-2016 07:17:13  
 Content = DPFGSE NOE 1d  
 ID = 13107  
 ID COMPACT = 13107  
 IN = 1H  
 X = 13C  
 Dimensions = ECA 500  
 Site = DELTA2\_NMR  
 Spectrometer =  
 Field\_strength = 11.6226421[T] (500[M  
 X\_acq\_duration = 1.76422912[s]  
 X\_freq = 495.13191398[MHz]  
 X\_offset = 5[ppm]  
 X\_resolution = 0.5668198[Mz]  
 X\_resolution\_h = 0.5668198[Mz]  
 X\_resolution\_v = 0.5668198[Mz]  
 Irr\_freq = 495.13191398[MHz]  
 Irr\_offset = 5[ppm]  
 Tri\_freq = 495.13191398[MHz]  
 Tri\_offset = 5[ppm]  
 Mod\_return = 1  
 Scans = 2048  
 Total\_scans = 2048  
 X\_acq\_time = 1.76422912[s]  
 X\_atn = 1.0[DB]  
 X\_f1 = 100  
 Irr\_mode = OFF  
 Obs\_sel\_180 = 20[ms]  
 Obs\_sel\_offset = 3.6125[ppm]  
 Obs\_sel\_shape = GAUSS  
 Obs\_sel\_alp = 0.125[ppm]  
 Tri\_mod = FALSE  
 Data\_preset = 1[ms]  
 Grad\_1 = 1[ms]  
 Grad\_2 = 30[ms]  
 Grad\_3 = 1[ms]  
 Grad\_4 = 10[ms]  
 Grad\_5 = 10[ms]  
 Grad\_recovery = 0.1[ms]  
 Grad\_shape = 1[ms]  
 Grad\_shape2 = 1[ms]  
 Mix\_time = 0.5[s]  
 Recvr\_gain\_delay = 50  
 Repetition\_time = 8.76422912[s]  
 Temp\_get = 22.1[OC]

0.276  
0.63  
0.796  
1.13

-100  
-132.51

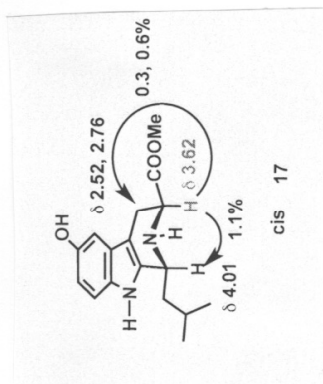

abundance

2.4998  
2.5192  
2.5284  
2.7459  
2.7757  
3.6045  
3.6263  
3.6343  
3.6698  
3.6972  
4.0155

X : parts per Million : 1H

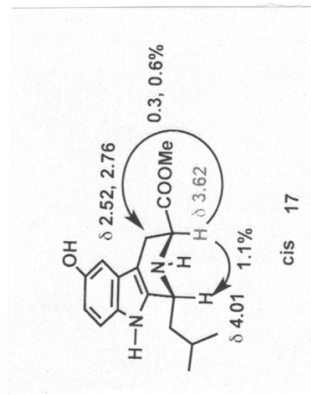

|                  |                         |
|------------------|-------------------------|
| Filepath         | = data                  |
| Experiment       | = nos                   |
| Experiment       | = nos                   |
| Solvent          | = DMF5-D6               |
| Creation_time    | = 21-MAR-2016 10:40:15  |
| Creation_time    | = 21-MAR-2016 10:40:15  |
| Current_time     | = 21-MAR-2016 07:42:07  |
| Content          | = DPFGSE NOE 1d         |
| Content          | = DPFGSE NOE 1d         |
| Dia_size         | = 13107                 |
| Dia_title        | = 1H                    |
| Dia_unit         | = [ppm]                 |
| Dia_dimensions   | = ECA 500               |
| Site             | = DELTA2_MMR            |
| Spectrometer     | = 1H_12926421[7] (500IM |
| Flt_strength     | = 1.764229212[s]        |
| X_acq_duration   | = 1.764229212[s]        |
| X_domain         | = 135.13193398 [kHz]    |
| X_offset         | = 5 [ppm]               |
| X_pos            | = 16394                 |
| X_resolution     | = 0.5668198 [Hz]        |
| X_swap           | = 9.2667563 [kHz]       |
| Yir_domain       | = 135.13193398 [kHz]    |
| Yir_offset       | = 5 [ppm]               |
| Yir_domain       | = 1H                    |
| Yir_freq         | = 499.13193398 [MHz]    |
| Yir_offset       | = FALSE                 |
| Yir_clip         | = 1                     |
| Yir_return       | = FALSE                 |
| Total_scans      | = 2048                  |
| X_acq_time       | = 1.764229212[s]        |
| X_pulse          | = 13.7 [us]             |
| Xir_mode         | = OFF                   |
| Obs_sel_160      | = 5 [ppm]               |
| Obs_sel_160      | = 5 [ppm]               |
| Obs_sel_offset   | = 3.6125 [ppm]          |
| Obs_sel_shape    | = GAUSS                 |
| Obs_sel_amp      | = 0.125 [ppm]           |
| Obs_sel_pos      | = FALSE                 |
| Dantc_preset     | = 1 [ms]                |
| Grad_1_amp       | = 1 [ms]                |
| Grad_2_amp       | = 1 [ms]                |
| Grad_3_amp       | = 30 [us]               |
| Grad_4_amp       | = 1 [ms]                |
| Grad_5_amp       | = 1 [ms]                |
| Grad_recovery    | = 0.1 [ms]              |
| Grad_shape       | = SINE                  |
| Grad_pos         | = 0.1 [ms]              |
| Grad_wait        | = 0.1 [ms]              |
| MX_time          | = 50                    |
| Recvr_gain       | = 75 [dB]               |
| Relaxation_delay | = 21.1565 [s]           |
| Relaxation_time  | = 22.1565 [s]           |
| Post_get         | = 22.1565 [s]           |

```

----- PROCESSING PARAMETERS -----
dc_balance : 0 : FALSE
semp : 0.2[Hz] : 0.0[s]
trapezoid3 : 0[%] : 80[%] : 100[%]
zerofill : 1
fft : 1 : TRUE
machinephase
ppm
Derived from: yama-16-12-09-1.jde

```

Derived from: yama-16-12-09-1.1.jdf

[illegible]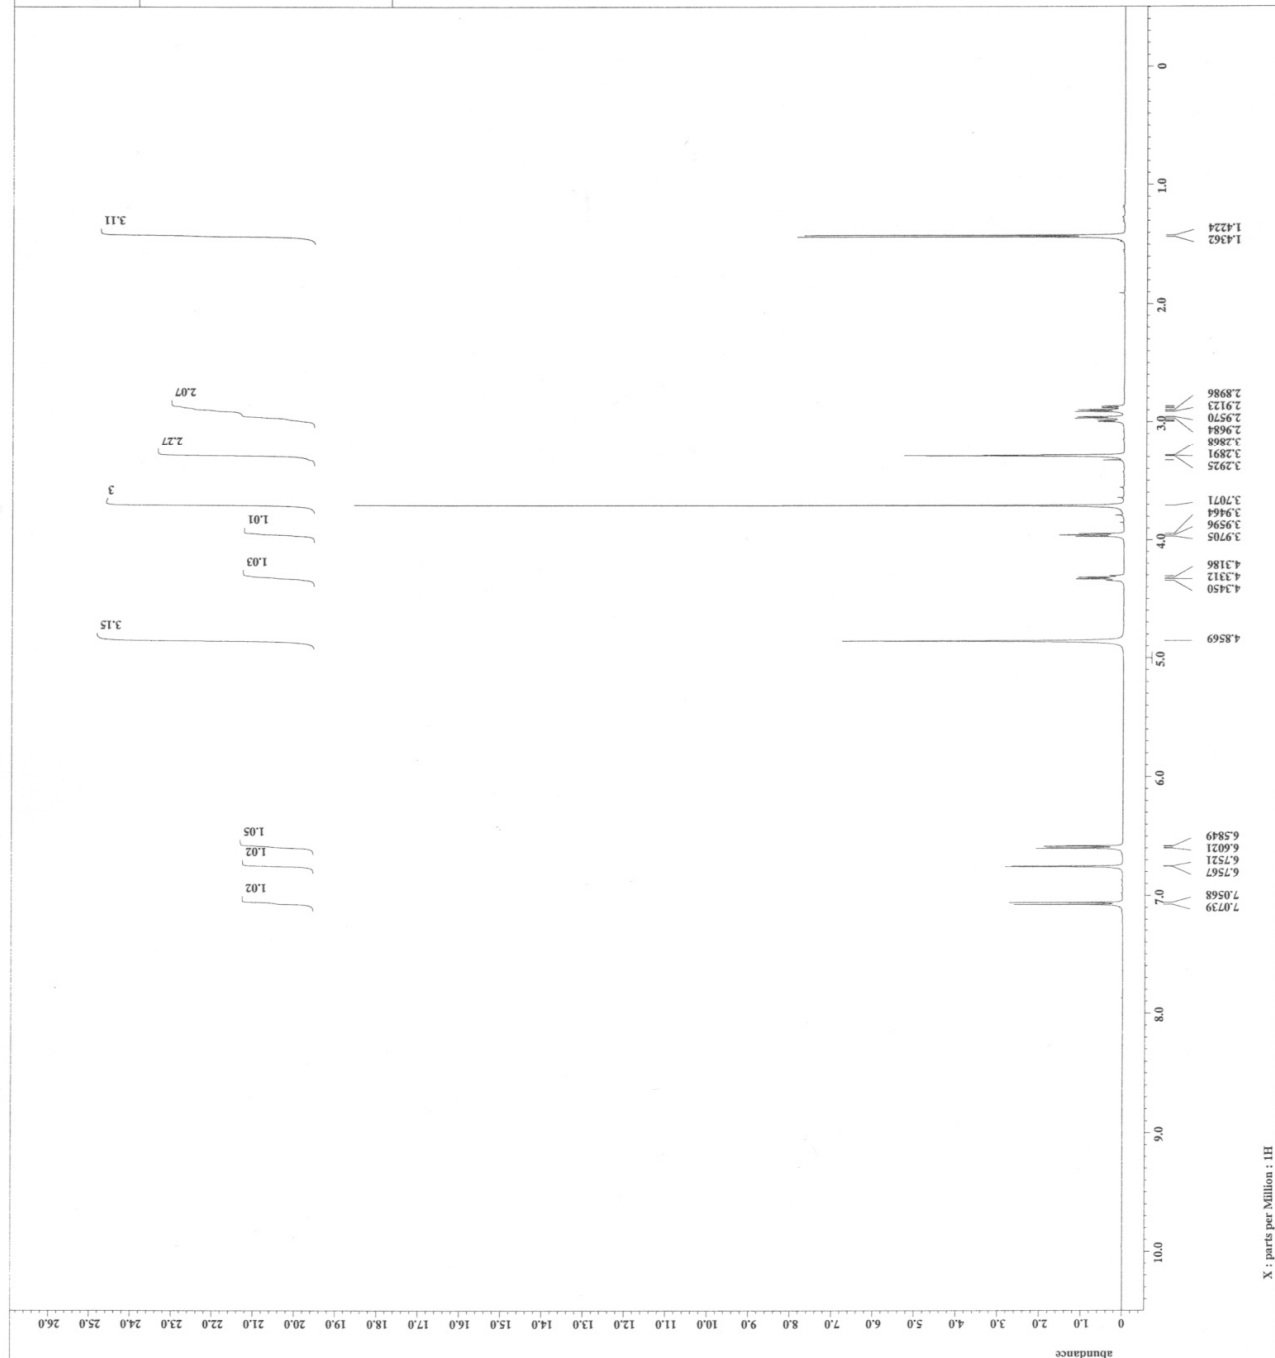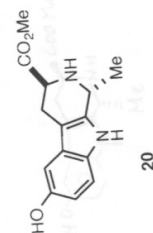

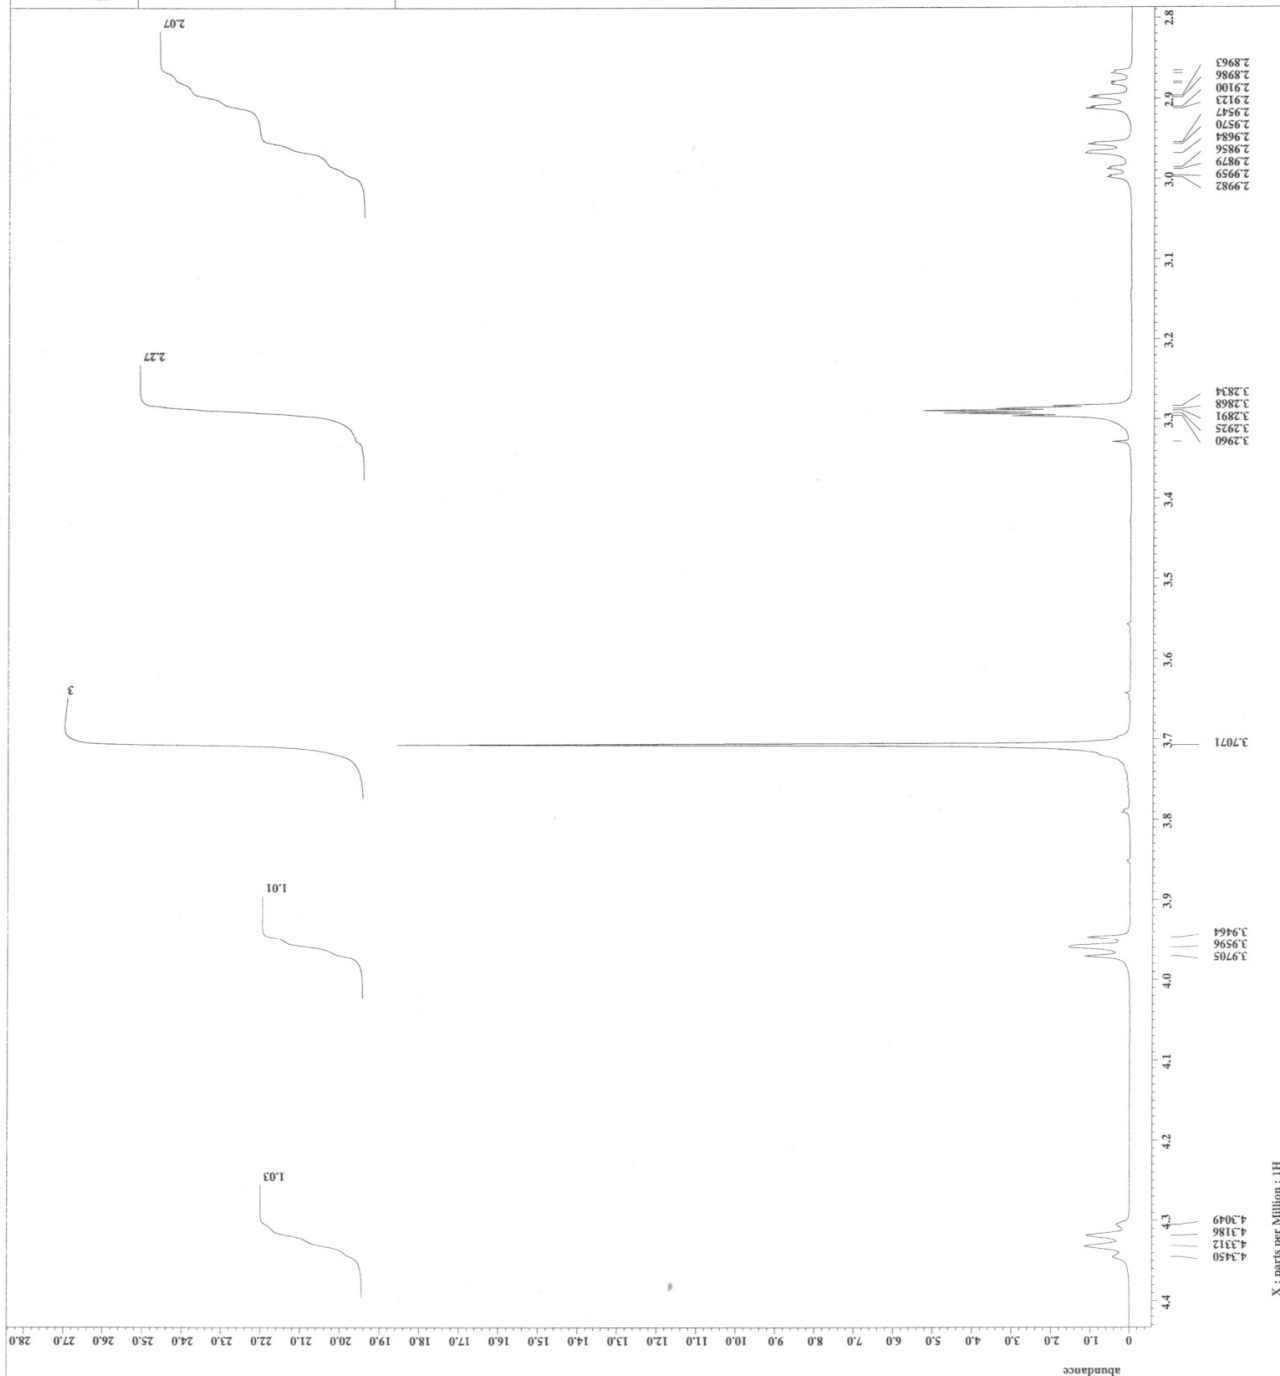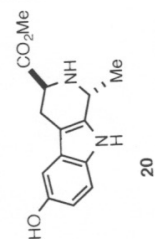

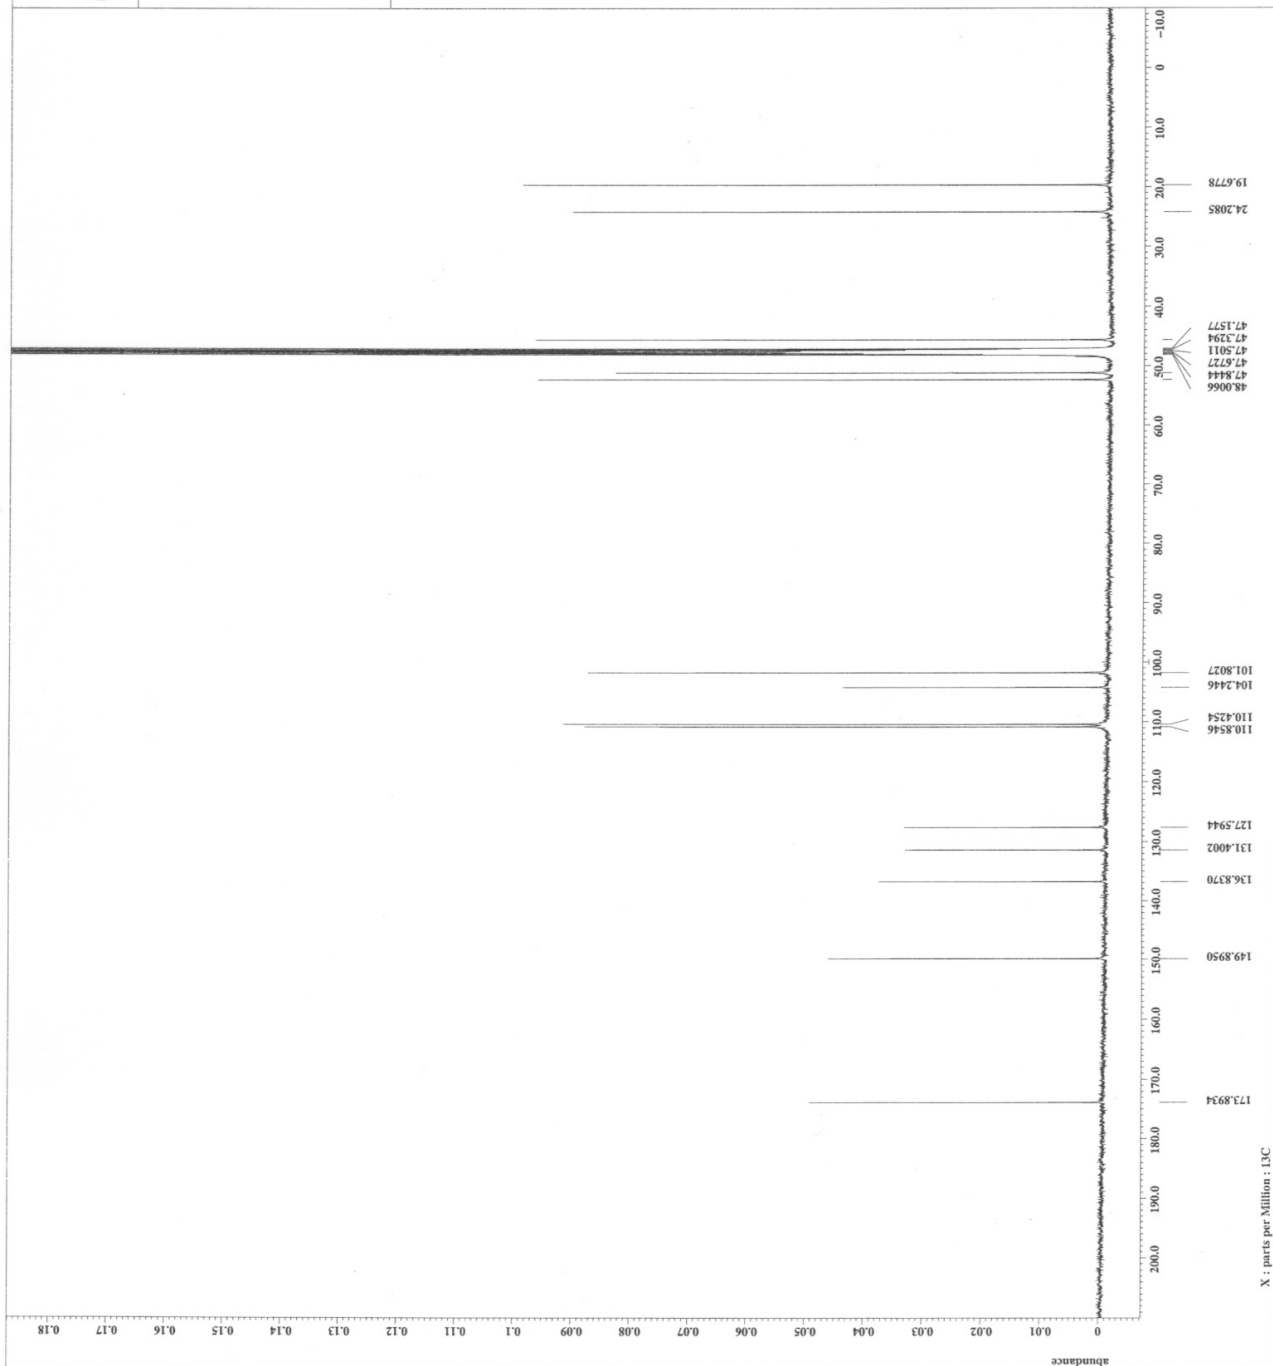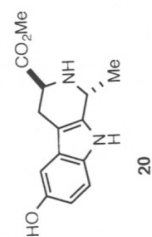

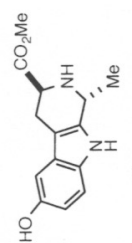





```

----- PROCESSING PARAMETERS -----
dc bal 0.3 [Hz] : 0 %
sorp : 0.3 [Hz] : 0 %
trapzoid1 : 0 % : 80 % : 100 %
zerofill : 1
fft : 1 : TRUE : TRUE
machinephase
ppm
Derived from:Hydrorectine B Me-ester-

```

Derived from: Hyrtioerectine B Me-ester-

|                                   |                          |
|-----------------------------------|--------------------------|
| Filename                          | ByteIOStream3_Memo       |
| Author                            | Gatta                    |
| Experiment                        | EMSA_Pulse.exe2          |
| Sample                            | EMSA-D5                  |
| Solvent                           | DMSO-d6                  |
| Creation_time                     | 2-DEC-2016 12:11:35      |
| Creation_date                     | 2-DEC-2016 12:11:35      |
| Current_time                      | 2-DEC-2016 17:58:28      |
| Current_date                      | 2-DEC-2016 17:58:28      |
| Comment                           | EMSA-D5_NMR              |
| Container                         | EMSA-D5_NMR              |
| Container_type                    | EMSA-D5_NMR              |
| Container_size                    | 11.7473579 [s] (500 [Hz] |
| Container_resolution              | 11.747357904 [s]         |
| Container_x_resolution            | 11.747357904 [s]         |
| Container_y_resolution            | 11.747357904 [s]         |
| Container_z_resolution            | 11.747357904 [s]         |
| Container_x_max                   | 50.155991521 [Hz]        |
| Container_y_max                   | 50.155991521 [Hz]        |
| Container_z_max                   | 50.155991521 [Hz]        |
| Container_x_min                   | 50.155991521 [Hz]        |
| Container_y_min                   | 50.155991521 [Hz]        |
| Container_z_min                   | 50.155991521 [Hz]        |
| Container_x_center                | 50.155991521 [Hz]        |
| Container_y_center                | 50.155991521 [Hz]        |
| Container_z_center                | 50.155991521 [Hz]        |
| Container_x_delta                 | 50.155991521 [Hz]        |
| Container_y_delta                 | 50.155991521 [Hz]        |
| Container_z_delta                 | 50.155991521 [Hz]        |
| Container_x_stddev                | 50.155991521 [Hz]        |
| Container_y_stddev                | 50.155991521 [Hz]        |
| Container_z_stddev                | 50.155991521 [Hz]        |
| Container_x_rms                   | 50.155991521 [Hz]        |
| Container_y_rms                   | 50.155991521 [Hz]        |
| Container_z_rms                   | 50.155991521 [Hz]        |
| Container_x_mean                  | 50.155991521 [Hz]        |
| Container_y_mean                  | 50.155991521 [Hz]        |
| Container_z_mean                  | 50.155991521 [Hz]        |
| Container_x_std                   | 50.155991521 [Hz]        |
| Container_y_std                   | 50.155991521 [Hz]        |
| Container_z_std                   | 50.155991521 [Hz]        |
| Container_x_rmsd                  | 50.155991521 [Hz]        |
| Container_y_rmsd                  | 50.155991521 [Hz]        |
| Container_z_rmsd                  | 50.155991521 [Hz]        |
| Container_x_rmsd_max              | 50.155991521 [Hz]        |
| Container_y_rmsd_max              | 50.155991521 [Hz]        |
| Container_z_rmsd_max              | 50.155991521 [Hz]        |
| Container_x_rmsd_min              | 50.155991521 [Hz]        |
| Container_y_rmsd_min              | 50.155991521 [Hz]        |
| Container_z_rmsd_min              | 50.155991521 [Hz]        |
| Container_x_rmsd_center           | 50.155991521 [Hz]        |
| Container_y_rmsd_center           | 50.155991521 [Hz]        |
| Container_z_rmsd_center           | 50.155991521 [Hz]        |
| Container_x_rmsd_delta            | 50.155991521 [Hz]        |
| Container_y_rmsd_delta            | 50.155991521 [Hz]        |
| Container_z_rmsd_delta            | 50.155991521 [Hz]        |
| Container_x_rmsd_stddev           | 50.155991521 [Hz]        |
| Container_y_rmsd_stddev           | 50.155991521 [Hz]        |
| Container_z_rmsd_stddev           | 50.155991521 [Hz]        |
| Container_x_rmsd_rms              | 50.155991521 [Hz]        |
| Container_y_rmsd_rms              | 50.155991521 [Hz]        |
| Container_z_rmsd_rms              | 50.155991521 [Hz]        |
| Container_x_rmsd_mean             | 50.155991521 [Hz]        |
| Container_y_rmsd_mean             | 50.155991521 [Hz]        |
| Container_z_rmsd_mean             | 50.155991521 [Hz]        |
| Container_x_rmsd_std              | 50.155991521 [Hz]        |
| Container_y_rmsd_std              | 50.155991521 [Hz]        |
| Container_z_rmsd_std              | 50.155991521 [Hz]        |
| Container_x_rmsd_rmsd             | 50.155991521 [Hz]        |
| Container_y_rmsd_rmsd             | 50.155991521 [Hz]        |
| Container_z_rmsd_rmsd             | 50.155991521 [Hz]        |
| Container_x_rmsd_rmsd_max         | 50.155991521 [Hz]        |
| Container_y_rmsd_rmsd_max         | 50.155991521 [Hz]        |
| Container_z_rmsd_rmsd_max         | 50.155991521 [Hz]        |
| Container_x_rmsd_rmsd_min         | 50.155991521 [Hz]        |
| Container_y_rmsd_rmsd_min         | 50.155991521 [Hz]        |
| Container_z_rmsd_rmsd_min         | 50.155991521 [Hz]        |
| Container_x_rmsd_rmsd_center      | 50.155991521 [Hz]        |
| Container_y_rmsd_rmsd_center      | 50.155991521 [Hz]        |
| Container_z_rmsd_rmsd_center      | 50.155991521 [Hz]        |
| Container_x_rmsd_rmsd_delta       | 50.155991521 [Hz]        |
| Container_y_rmsd_rmsd_delta       | 50.155991521 [Hz]        |
| Container_z_rmsd_rmsd_delta       | 50.155991521 [Hz]        |
| Container_x_rmsd_rmsd_stddev      | 50.155991521 [Hz]        |
| Container_y_rmsd_rmsd_stddev      | 50.155991521 [Hz]        |
| Container_z_rmsd_rmsd_stddev      | 50.155991521 [Hz]        |
| Container_x_rmsd_rmsd_rms         | 50.155991521 [Hz]        |
| Container_y_rmsd_rmsd_rms         | 50.155991521 [Hz]        |
| Container_z_rmsd_rmsd_rms         | 50.155991521 [Hz]        |
| Container_x_rmsd_rmsd_mean        | 50.155991521 [Hz]        |
| Container_y_rmsd_rmsd_mean        | 50.155991521 [Hz]        |
| Container_z_rmsd_rmsd_mean        | 50.155991521 [Hz]        |
| Container_x_rmsd_rmsd_std         | 50.155991521 [Hz]        |
| Container_y_rmsd_rmsd_std         | 50.155991521 [Hz]        |
| Container_z_rmsd_rmsd_std         | 50.155991521 [Hz]        |
| Container_x_rmsd_rmsd_rmsd        | 50.155991521 [Hz]        |
| Container_y_rmsd_rmsd_rmsd        | 50.155991521 [Hz]        |
| Container_z_rmsd_rmsd_rmsd        | 50.155991521 [Hz]        |
| Container_x_rmsd_rmsd_rmsd_max    | 50.155991521 [Hz]        |
| Container_y_rmsd_rmsd_rmsd_max    | 50.155991521 [Hz]        |
| Container_z_rmsd_rmsd_rmsd_max    | 50.155991521 [Hz]        |
| Container_x_rmsd_rmsd_rmsd_min    | 50.155991521 [Hz]        |
| Container_y_rmsd_rmsd_rmsd_min    | 50.155991521 [Hz]        |
| Container_z_rmsd_rmsd_rmsd_min    | 50.155991521 [Hz]        |
| Container_x_rmsd_rmsd_rmsd_center | 50.155991521 [Hz]        |
| Container_y_rmsd_rmsd_rmsd_center | 50.155991521 [Hz]        |
| Container_z_rmsd_rmsd_rmsd_center | 50.155991521 [Hz]        |
| Container_x_rmsd_rmsd_rmsd_delta  | 50.155991521 [Hz]        |
| Container_y_rmsd_rmsd_rmsd_delta  | 50.155991521 [Hz]        |
| Container_z_rmsd_rmsd_rmsd_delta  | 50.155991521 [Hz]        |
| Container_x_rmsd_rmsd_rmsd_stddev | 50.155991521 [Hz]        |
| Container_y_rmsd_rmsd_rmsd_stddev | 50.155991521 [Hz]        |
| Container_z_rmsd_rmsd_rmsd_stddev | 50.155991521 [Hz]        |
| Container_x_rmsd_rmsd_rmsd_rms    |                          |

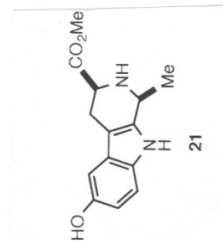

Derived from: Hyrtioerectine B Me-ester-

[illegible]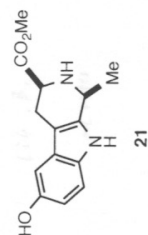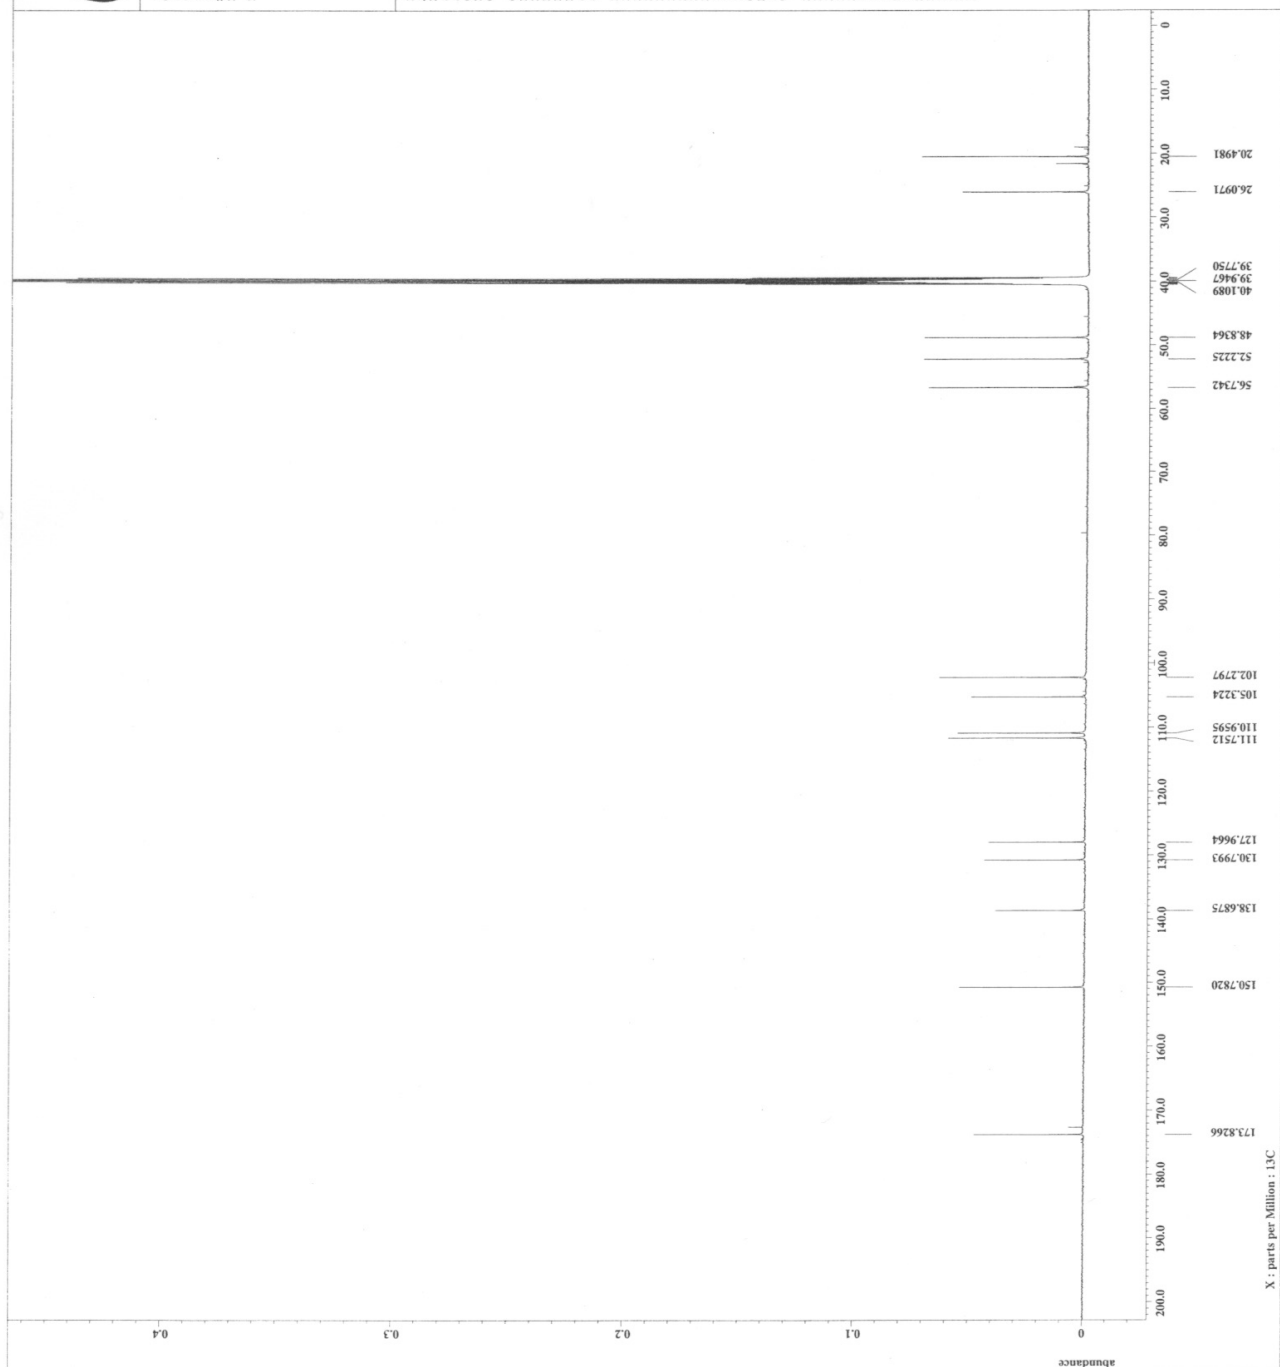

Derived from: Hyrtioerectine B Me-ester-

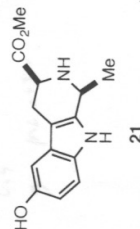

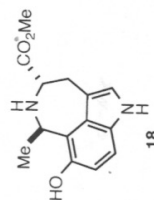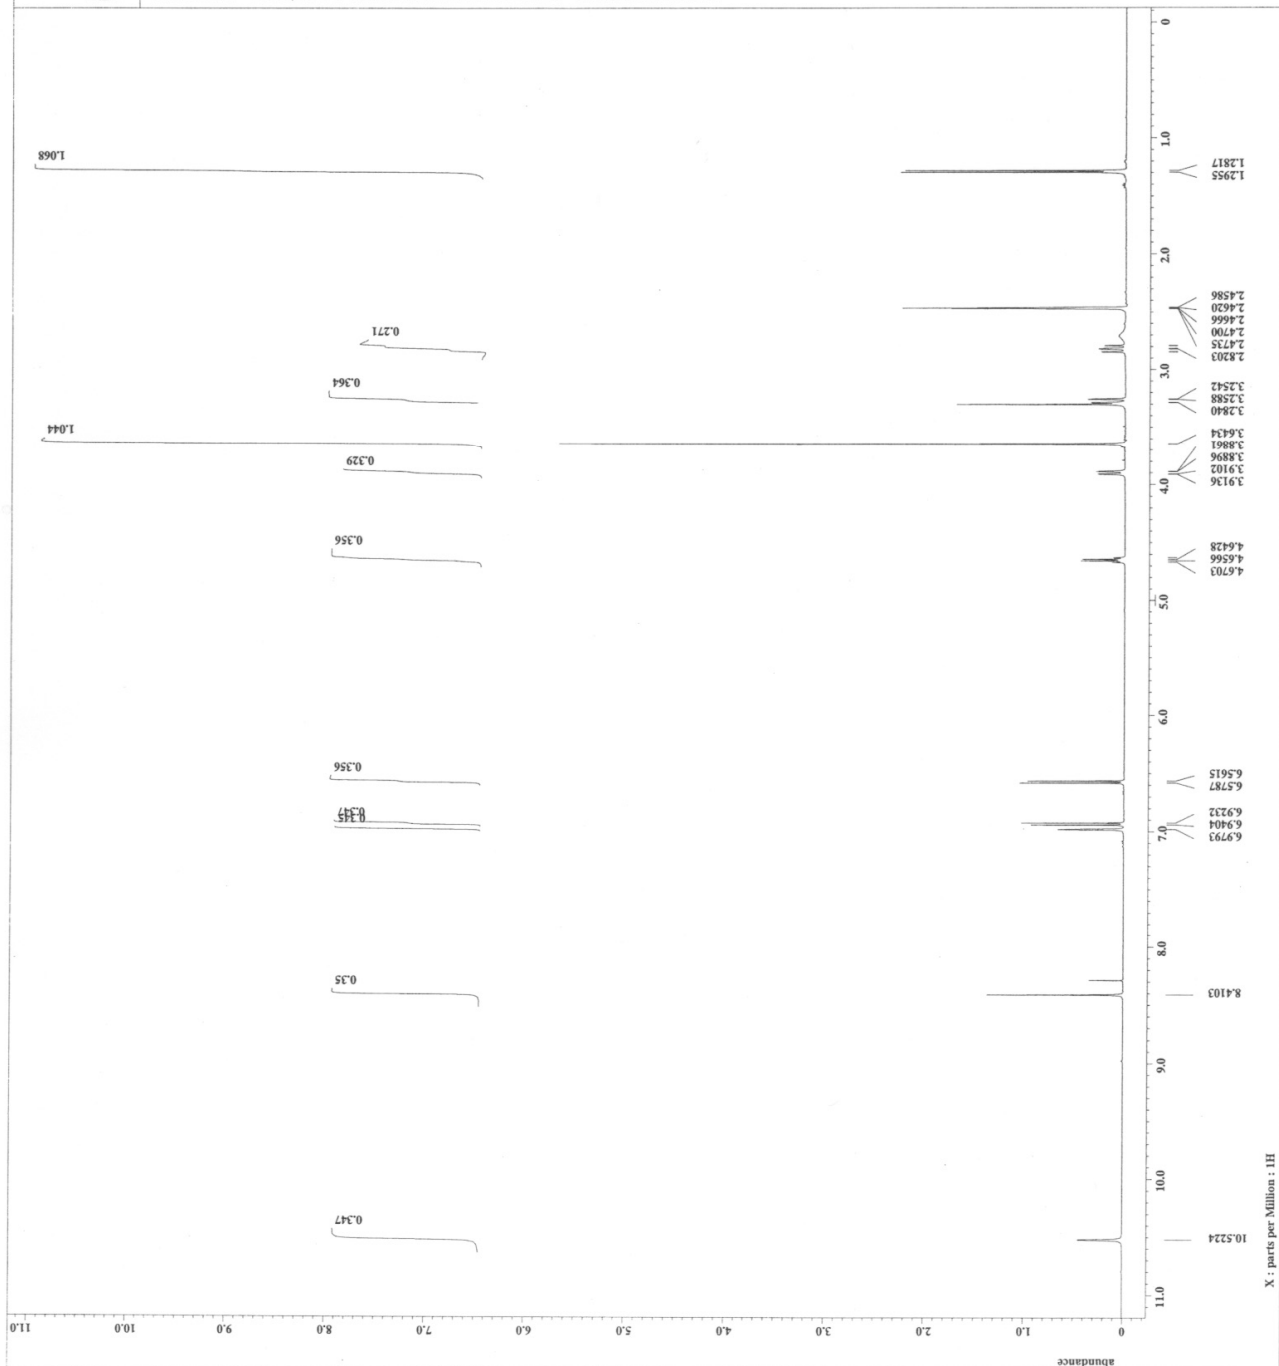

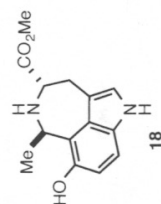

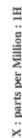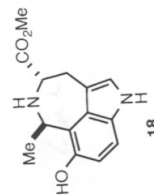

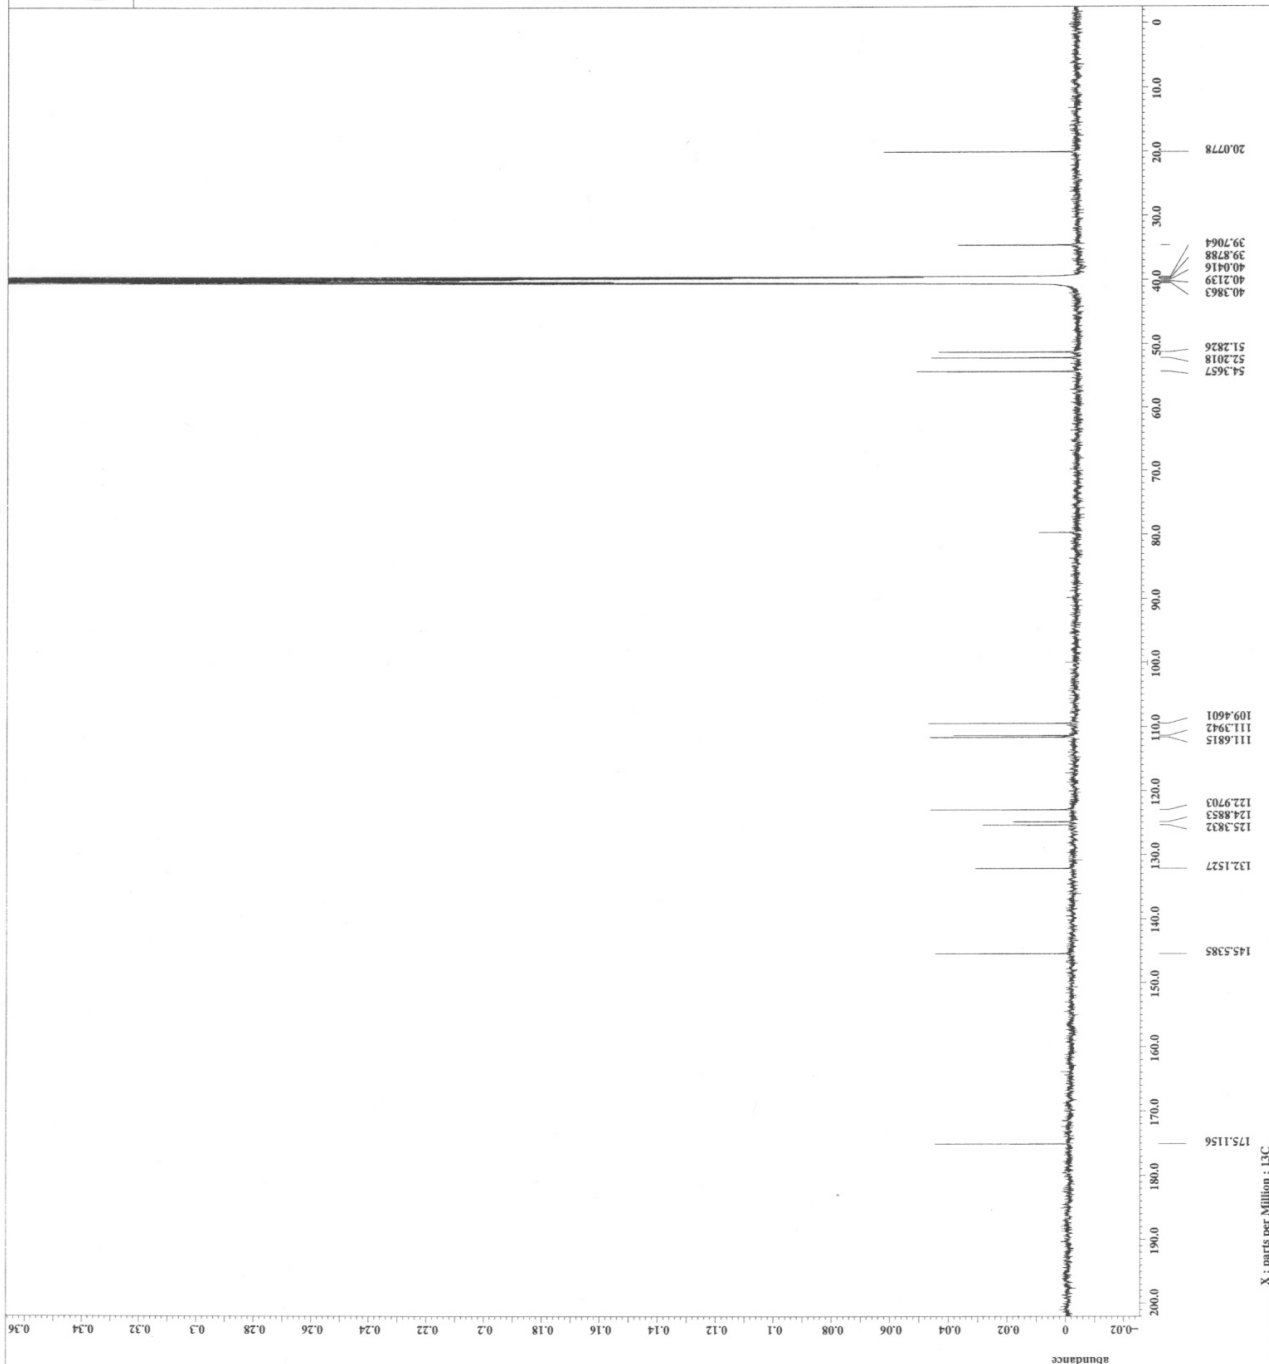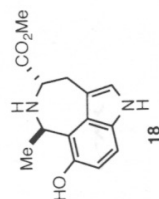

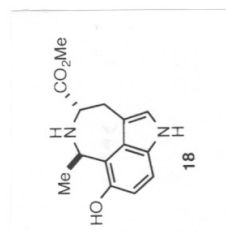



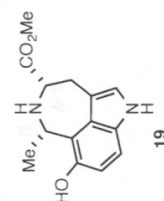

5 1

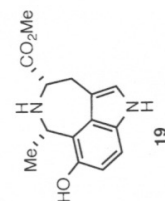

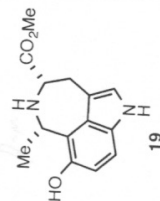

X : parts per Million : 1H

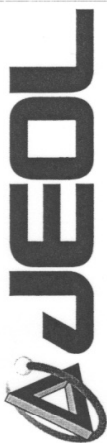

---- PROCESSING PARAMETERS ----  
 de\_maltese 0 : FALSE  
 transoid3 0 : 80[°] : 100[°]  
 zerofill 1 :  
 machine : TRUE  
 ppm  
 Derived from: yema-16-12-06-3.jdf

=====  
 File: yema-16-12-06-4.jdf  
 Name: yema-16-12-06-4  
 Experiment: single\_pulse\_dec  
 Sample\_id: S8621468  
 Solvent: CHLOROFORM-D  
 Date: 2016-08-20 21:20:21  
 Revision: 1  
 Current\_time: 7-DEC-2016 08:24:44  
 Comment: single pulse decouple  
 Data\_format: 1D COMPLEX  
 File\_size: 81.4  
 Dim: 1  
 Dim\_units: [ppm]  
 Dimensions: 1  
 Spectrometer: DELTA 500  
 Field\_strength: 11.742379[G] (500[MH  
 X\_domain: 0.8336172[Hz]  
 X\_acq\_duration: 13.3  
 X\_domain: 13C  
 X\_freq: 125.7652978[MHz]  
 X\_resolution: 32768  
 X\_points: 4  
 X\_prescans: 13858034[Hz]  
 X\_resolution: 39.3081761[MHz]  
 X\_sweep: 18  
 X\_domain: 18  
 X\_freq: 159.91521[MHz]  
 X\_resolution: 5.0[ppm]  
 X\_offset: FALSE  
 Mod\_return: 19092  
 Total\_scans: 19092  
 X\_resolution: 11.3[Hz]  
 X\_acq\_time: 0.8336172[Hz]  
 X\_angle: 30[deg]  
 X\_atn: 3.9[deg]  
 X\_atn\_dec: 21.238[db]  
 X\_atn\_dec: 21.238[db]  
 X\_atn\_dec: 21.238[db]  
 X\_atn\_dec: TRUE  
 Decoupling: 1[s]  
 Initial\_wait: 1[s]  
 Noe\_time: 2[Hz]  
 Noe\_gain: 54  
 Relaxation\_delay: 2[s]  
 Relaxation\_time: 23.3[sec]  
 Temp\_get:

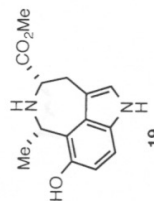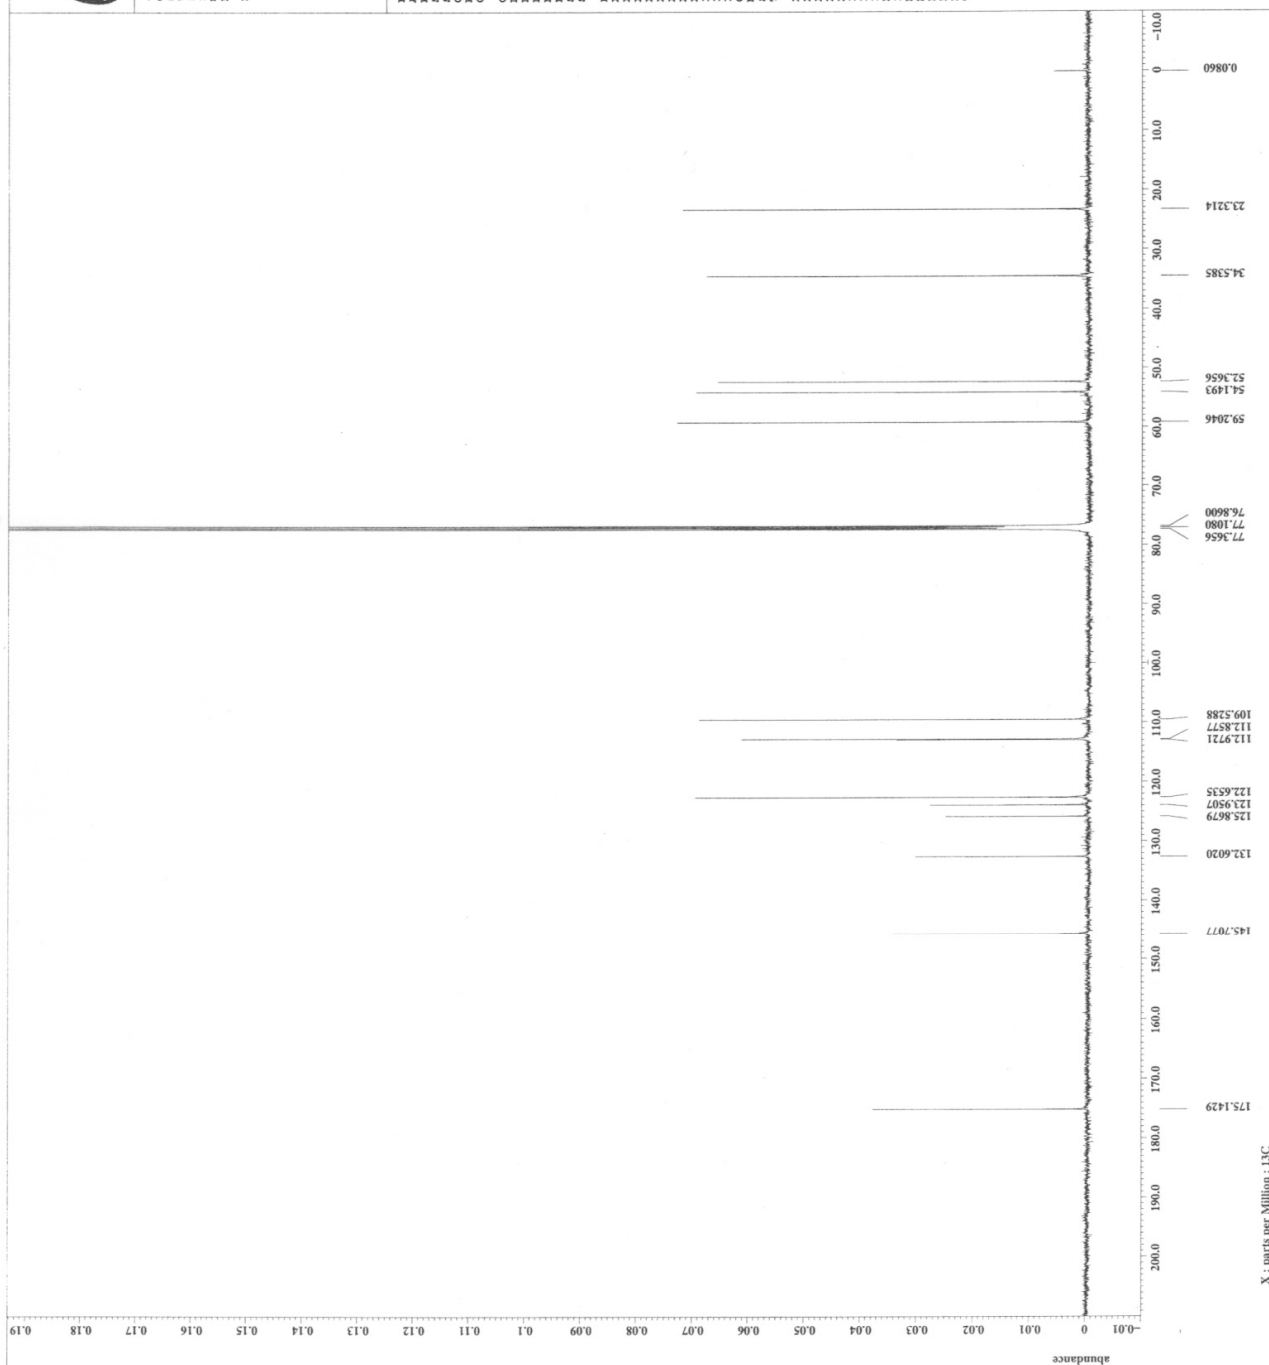

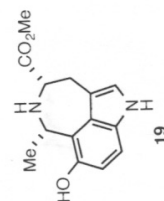

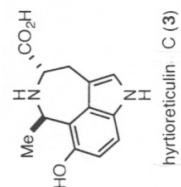

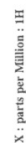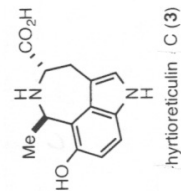

hyrtioreticulín : C (3)

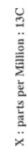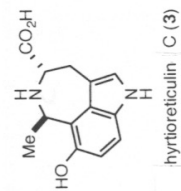



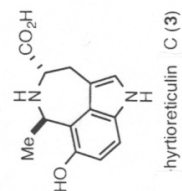

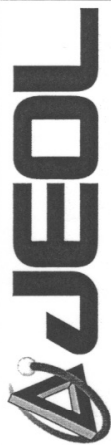

----- PROCESSING PARAMETERS -----  
Date\_UTC : 2016 04 22 15:53  
freq\_mhz : 500.1350989  
solv : DMSO-d6  
temp\_cold3 : 0 [N] : 80 [N] : 100 [N]  
temp\_hot3 : 0 [N] : 100 [N]  
zfc : 1 : TRUE : TRUE  
machinephase  
ppm  
Derived from: hyrtioelectinC-TFA-1.jdf

Filename = hyrtioelectinC-TFA-4  
AcqName = single\_pulse-ex2  
Sample\_id = 8833089  
Creation\_time = 5-DEC-2016 04:22:53  
Revision\_time = 5-DEC-2016 09:31:39  
Current\_time = 5-DEC-2016 09:31:53  
Comment = single\_pulse  
Data\_format = 13-COMPLEX  
Dir\_title = 1M  
Dir\_units = [ppm]  
Spectrum = ECA500  
Spectrum = DELTA2\_HMR  
Field\_strength = 11.7473575 [T] (500 MHz)  
X\_acq\_duration = 1.74587904 [s]  
X\_domain = 20.15991521 [MHz]  
X\_offset = 5.0 [ppm]  
X\_points = 16384  
X\_resolution = 0.5727737 [Hz]  
X\_sweep = 2.38438438 [kHz]  
Xrr\_domain = 500.15991521 [MHz]  
Xrr\_offset = 5.0 [ppm]  
Xrr\_domain = 20.15991521 [MHz]  
Xrr\_offset = 5.0 [ppm]  
Clipped = FALSE  
Scans = 8  
Total\_scans = 8  
X\_90\_width = 11.8 [us]  
X\_acq\_time = 1.74587904 [s]  
X\_angle = 45 [deg]  
X\_pulse = 5.5 [us]  
Xrr\_mode = Off  
Xrr\_pulse = 1 [us]  
Date\_acq = 2016-12-05  
Initial\_wait = 1 [s]  
Receiv\_gain\_delay = 54  
Repetition\_time = 6.74587904 [s]  
Temp\_get = 23.9 [dC]

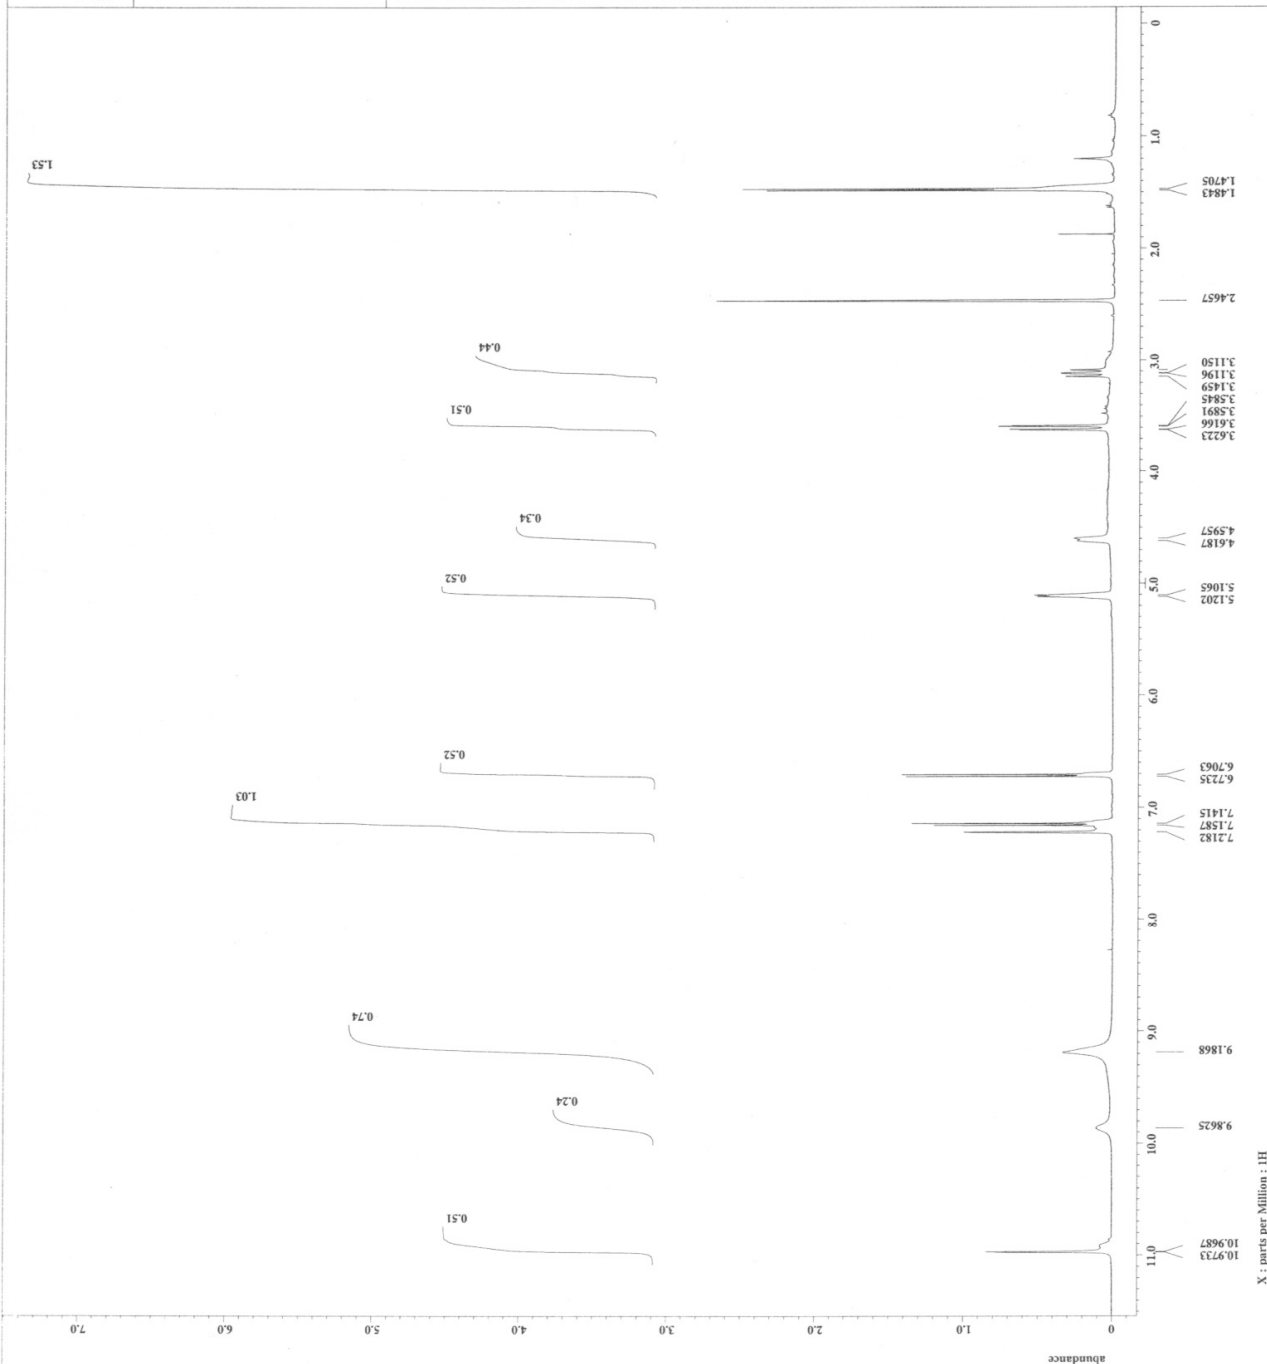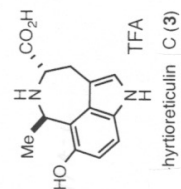

Derived from: HyrtioerectineC-TFA-1.jdf

|                |                              |
|----------------|------------------------------|
| Filename       | = PytloracineC-7FA           |
| Author         | = Data                       |
| Experiment     | = Experiment                 |
| Sample         | = SampleName.es2             |
| Solvent        | = DMSO-d6                    |
| Concentration  | = 5-DMSO-2d6 04:22:53        |
| Creation_time  | = 5-DMSO-2d6 05:30:01        |
| Current_time   | = 5-DMSO-2d6 05:30:01        |
| Comment        | = sample_pulse               |
| Data format    | = 1D COMPLEX                 |
| Dir_name       | = 13107                      |
| Dir_unit       | = 13107                      |
| Dimensions     | = 1 [ppm]                    |
| Site           | = X                          |
| Spectrometer   | = ECA500                     |
| Field_strength | = 121.7473579 [T] (500 [MHz] |
| Frequency      | = 130.7597904 [Hz]           |
| X_freq         | = 500.159991521 [MHz]        |
| X_resolution   | = 16.84 [ppm]                |
| X_points       | = 16384                      |
| X_prescan      | = 1                          |
| Y_resolution   | = 0.57277773 [Hz]            |
| Y_freq         | = 130.7597904 [MHz]          |
| Y_resolution   | = 16.84 [ppm]                |
| Y_points       | = 16384                      |
| Y_prescan      | = 1                          |
| Y_acquisition  | = 500.159991521 [MHz]        |
| Y_resolution   | = 16.84 [ppm]                |
| Y_points       | = 16384                      |
| Y_prescan      | = 1                          |
| Mod_return     | = FALSE                      |
| Acq_start      | = 0                          |
| Acq_end        | = 0                          |
| Acq_secs       | = 0                          |
| Acq_width      | = 1.7 [us]                   |
| Acq_delay      | = 1.7 [us]                   |
| Acq_pause      | = 45 [sec]                   |
| Acq_sample     | = 5 [us]                     |
| Acq_xatn       | = 3.4 [dB]                   |
| Acq_yatn       | = 3.4 [dB]                   |
| Acq_xoff       | = 0 [us]                     |
| Acq_yoff       | = 0 [us]                     |
| Acq_xmode      | = Off                        |
| Acq_ymode      | = Off                        |
| Acq_xphase     | = 0 [deg]                    |
| Acq_yphase     | = 0 [deg]                    |
| Acq_xpwr       | = 54                         |
| Acq_ypwr       | = 54                         |
| Acq_gain       | = 54                         |
| Acq_delay      | = 54 [us]                    |
| Acq_delay2     | = 54 [us]                    |
| Acq_delay3     | = 54 [us]                    |
| Acq_delay4     | = 54 [us]                    |
| Acq_delay5     | = 54 [us]                    |
| Acq_delay6     | = 54 [us]                    |
| Acq_delay7     | = 54 [us]                    |
| Acq_delay8     | = 54 [us]                    |
| Acq_delay9     | = 54 [us]                    |
| Acq_delay10    | = 54 [us]                    |
| Acq_delay11    | = 54 [us]                    |
| Acq_delay12    | = 54 [us]                    |
| Acq_delay13    | = 54 [us]                    |
| Acq_delay14    | = 54 [us]                    |
| Acq_delay15    | = 54 [us]                    |
| Acq_delay16    | = 54 [us]                    |
| Acq_delay17    | = 54 [us]                    |
| Acq_delay18    | = 54 [us]                    |
| Acq_delay19    | = 54 [us]                    |
| Acq_delay20    | = 54 [us]                    |
| Acq_delay21    | = 54 [us]                    |
| Acq_delay22    | = 54 [us]                    |
| Acq_delay23    | = 54 [us]                    |
| Acq_delay24    | = 54 [us]                    |
| Acq_delay25    | = 54 [us]                    |
| Acq_delay26    | = 54 [us]                    |
| Acq_delay27    | = 54 [us]                    |
| Acq_delay28    | = 54 [us]                    |
| Acq_delay29    | = 54 [us]                    |
| Acq_delay30    | = 54 [us]                    |
| Acq_delay31    | = 54 [us]                    |
| Acq_delay32    | = 54 [us]                    |
| Acq_delay33    | = 54 [us]                    |
| Acq_delay34    | = 54 [us]                    |
| Acq_delay35    | = 54 [us]                    |
| Acq_delay36    | = 54 [us]                    |
| Acq_delay37    | = 54 [us]                    |
| Acq_delay38    | = 54 [us]                    |
| Acq_delay39    | = 54 [us]                    |
| Acq_delay40    | = 54 [us]                    |
| Acq_delay41    | = 54 [us]                    |
| Acq_delay42    | = 54 [us]                    |
| Acq_delay43    | = 54 [us]                    |
| Acq_delay44    | = 54 [us]                    |
| Acq_delay45    | = 54 [us]                    |
| Acq_delay46    | = 54 [us]                    |
| Acq_delay47    | = 54 [us]                    |
| Acq_delay48    | = 54 [us]                    |
| Acq_delay49    | = 54 [us]                    |
| Acq_delay50    | = 54 [us]                    |
| Acq_delay51    | = 54 [us]                    |
| Acq_delay52    | = 54 [us]                    |
| Acq_delay53    | = 54 [us]                    |
| Acq_delay54    | = 54 [us]                    |
| Acq_delay55    | = 54 [us]                    |
| Acq_delay56    | = 54 [us]                    |
| Acq_delay57    | = 54 [us]                    |
| Acq_delay58    | = 54 [us]                    |
| Acq_delay59    | = 54 [us]                    |
| Acq_delay60    | = 54 [us]                    |
| Acq_delay61    | = 54 [us]                    |
| Acq_delay62    | = 54 [us]                    |
| Acq_delay63    | = 54 [us]                    |
| Acq_delay64    | = 54 [us]                    |
| Acq_delay65    | = 54 [us]                    |
| Acq_delay66    | = 54 [us]                    |
| Acq_delay67    | = 54 [us]                    |
| Acq_delay68    | = 54 [us]                    |
| Acq_delay69    | = 54 [us]                    |
| Acq_delay70    | = 54 [us]                    |
| Acq_delay71    | = 54 [us]                    |
| Acq_delay72    | = 54 [us]                    |
| Acq_delay73    | = 54 [us]                    |
| Acq_delay74    | = 54 [us]                    |
| Acq_delay75    | = 54 [us]                    |
| Acq_delay76    | = 54 [us]                    |
| Acq_delay77    | = 54 [us]                    |
| Acq_delay78    | = 54 [us]                    |
| Acq_delay79    | = 54 [us]                    |
| Acq_delay80    | = 54 [us]                    |
| Acq_delay81    | = 54 [us]                    |
| Acq_delay82    | = 54 [us]                    |
| Acq_delay83    | = 54 [us]                    |
| Acq_delay84    | = 54 [us]                    |
| Acq_delay85    | = 54 [us]                    |
| Acq_delay86    | = 54 [us]                    |
| Acq_delay87    | = 54 [us]                    |
| Acq_delay88    | = 54 [us]                    |
| Acq_delay89    | = 54 [us]                    |
| Acq_delay90    | = 54 [us]                    |
| Acq_delay91    | = 54 [us]                    |
| Acq_delay92    | = 54 [us]                    |
| Acq_delay93    | = 54 [us]                    |
| Acq_delay94    | = 54 [us]                    |
| Acq_delay95    | = 54 [us]                    |
| Acq_delay96    | = 54 [us]                    |
| Acq_delay97    | = 54 [us]                    |
| Acq_delay98    | = 54 [us]                    |
| Acq_delay99    | = 54 [us]                    |
| Acq_delay100   | = 54 [us]                    |
| Acq_delay101   | = 54 [us]                    |
| Acq_delay102   | = 54 [us]                    |
| Acq_delay103   | = 54 [us]                    |
| Acq_delay104   | = 54 [us]                    |
| Acq_delay105   | = 54 [us]                    |
| Acq_delay106   | = 54 [us]                    |
| Acq_delay107   | = 54 [us]                    |
| Acq_delay108   | = 54 [us]                    |
| Acq_delay109   | = 54 [us]                    |
| Acq_delay110   | = 54 [us]                    |
| Acq            |                              |

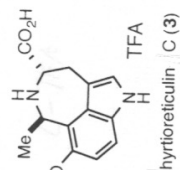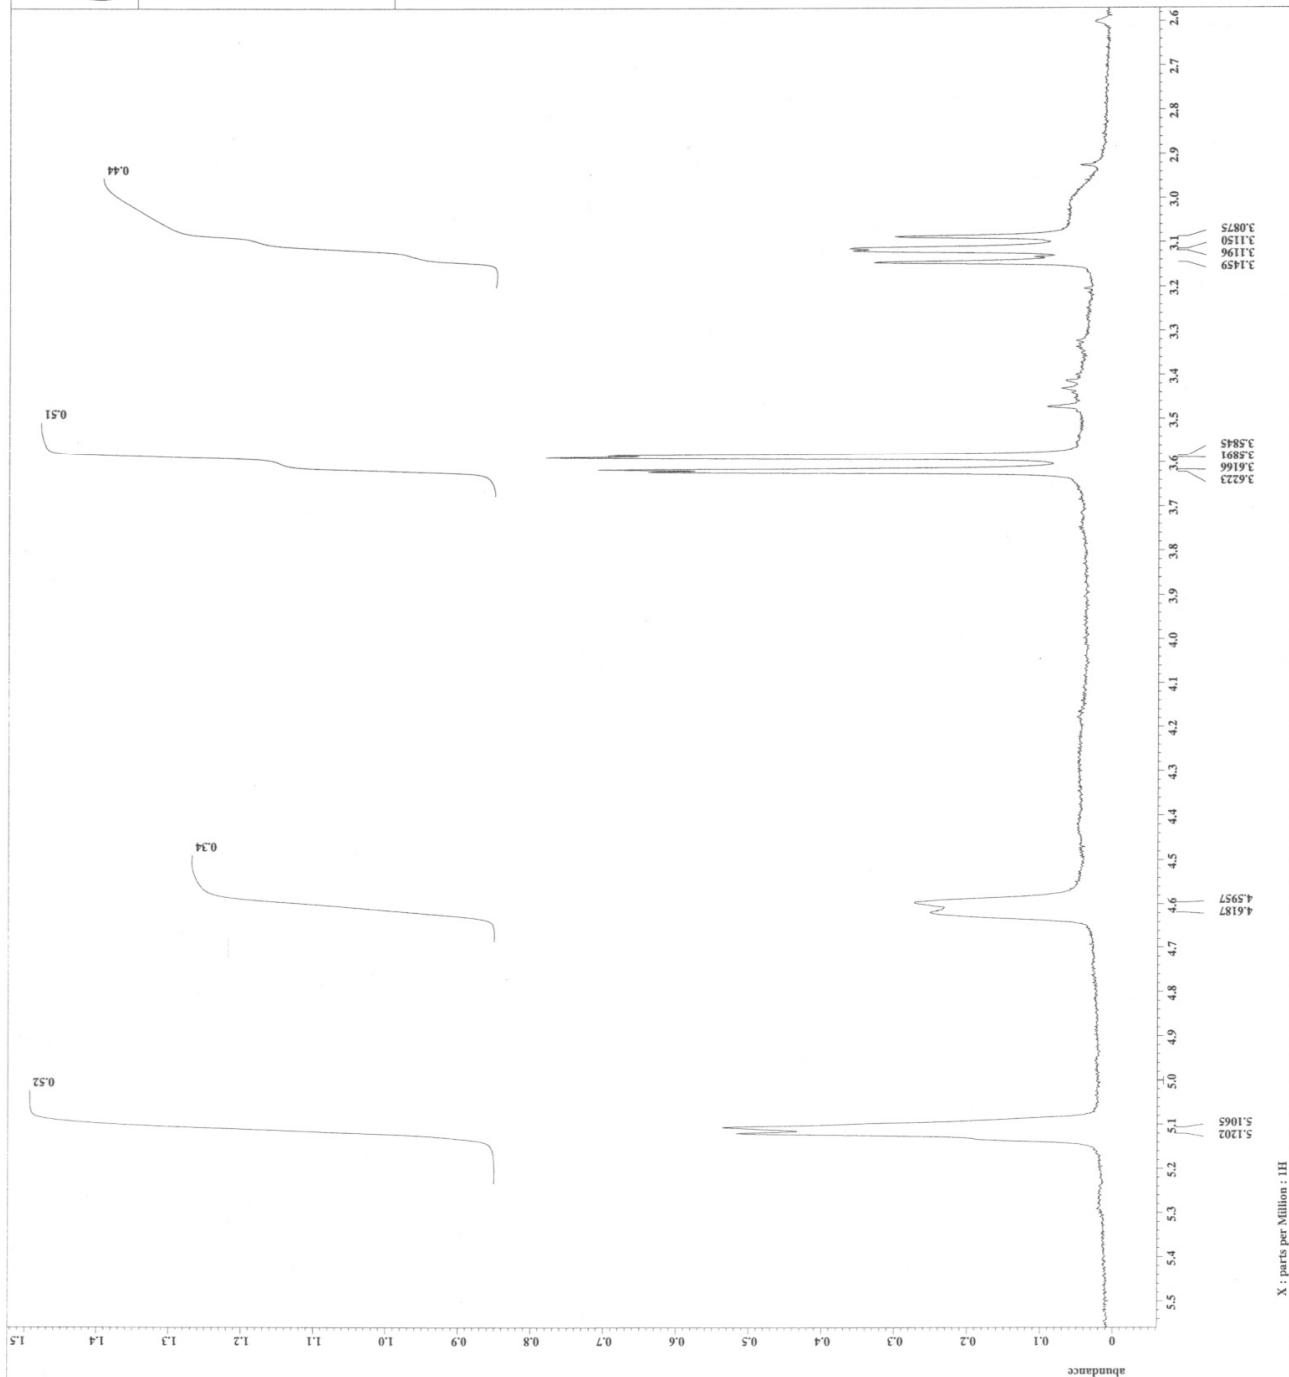



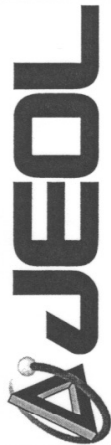

----- PROCESSING PARAMETERS -----  
GC balance : 0 : FALSE  
Sample mass : 0.0000 g  
TropSolid : 0 [%] : 100 [%]  
ZeroFill : 1  
F2 C1 : TRUE  
MachinePhase : TRUE  
ppm  
Derived from: HyrtioectineC-TFA-7.jdf

Filename = HyrtioectineC-TFA-8  
Author =  
Experiment =  
SampleId = 485669  
Solvent = DMSO-D6  
Creation time = 6-DEC-2016 02:14:09  
Creation date = 6-DEC-2016 02:14:09  
Current time = 6-DEC-2016 07:22:28  
Comment = single pulse decouple  
Data format = ID COMPLEX  
Data size = 26214  
Dim size = 13C  
Dim title =  
Dimensions = X  
Site = ECA500  
Spectrometer = DELTA\_NMR  
Field strength = 11.747375 [T] (500 MHz)  
X\_acq\_duration = 0.83361792 [s]  
X\_freq = 125.76529768 [MHz]  
X\_offset = 100 [ppm]  
X\_resolution = 4.27768  
X\_resolution = 1.19959034 [Hz]  
X\_resolution = 38.3081761 [MHz]  
X\_sweep = 500.15991521 [MHz]  
Irr\_freq = 5.0 [ppm]  
Irr\_offset = 1  
ModReturn = 1  
Scans = 19647  
Total\_scans = 19647  
X\_90\_width = 11.3 [us]  
X\_acq\_time = 0.83361792 [s]  
X\_delay = 5.5 [us]  
X\_echo = 5.5 [us]  
X\_pulse = 3.76666667 [us]  
X\_pulse\_dec = 1.3 [us]  
Irr\_pulse = 21.238 [dB]  
Irr\_noise = WALTZ  
Decoupling = TRUE  
P1 = 1  
P2 = 1  
Noe\_time = 2 [s]  
Acquisition = 2 [s]  
Repetition\_delay = 2 [s]  
Repetition\_time = 2.83361792 [s]  
Temp\_get = 23.2 [dC]

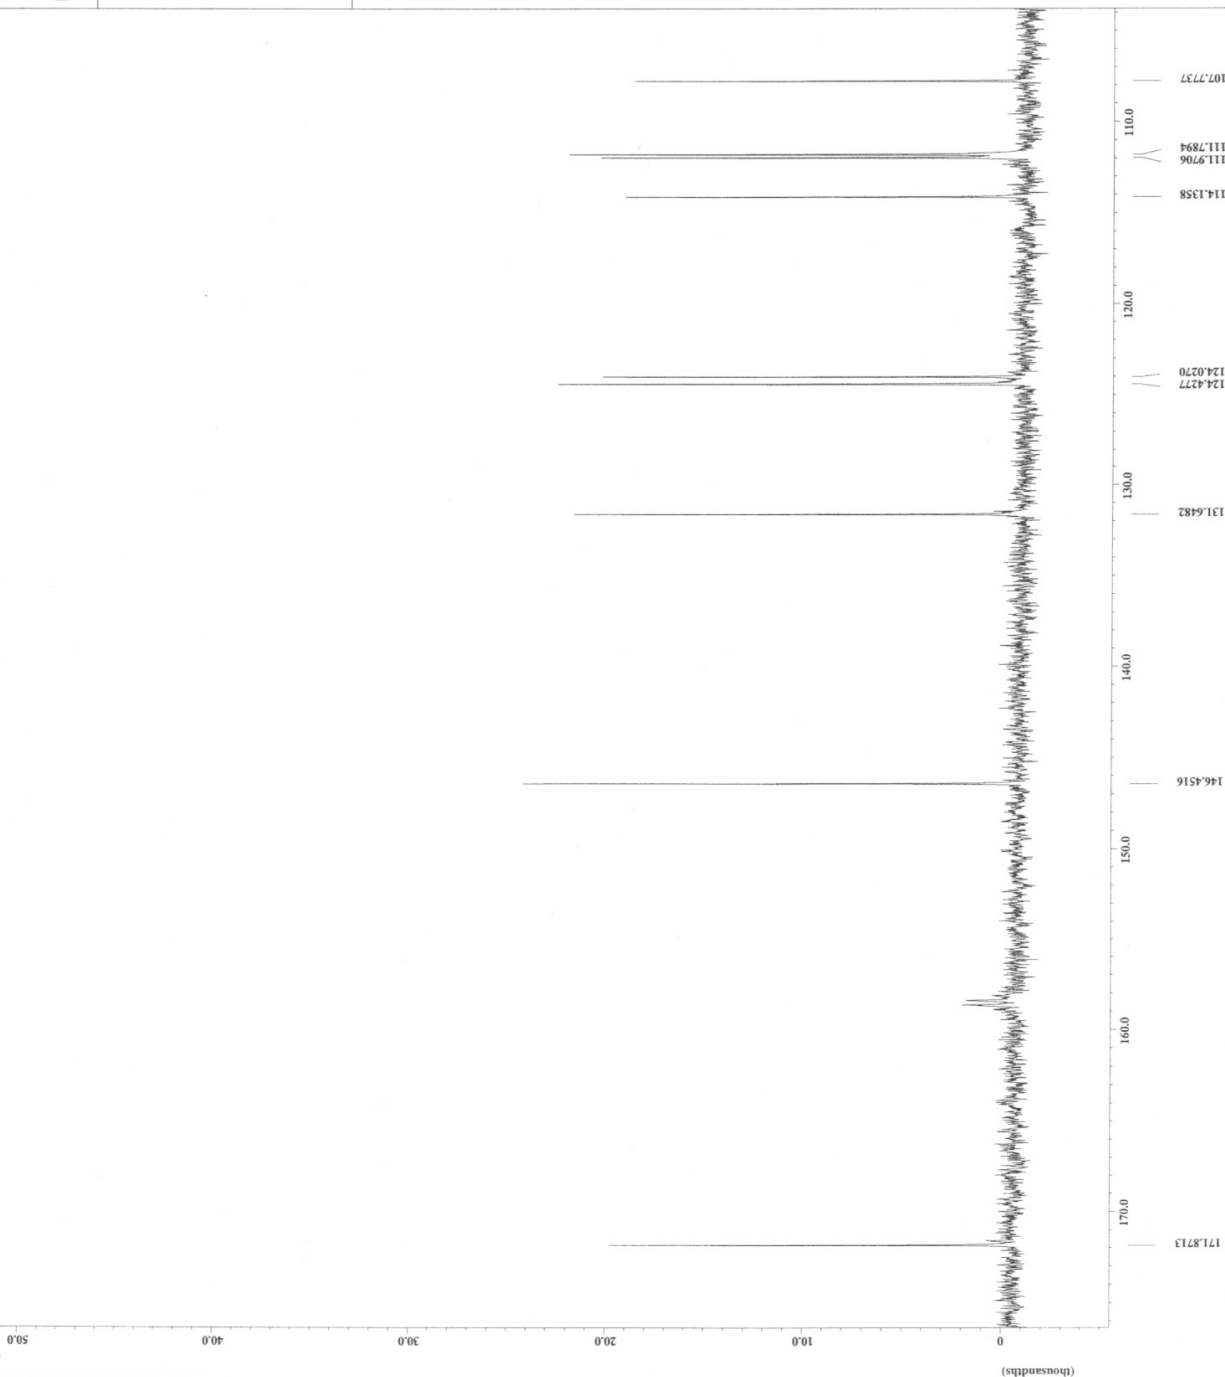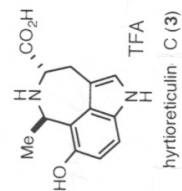

X : parts per Million : 13C

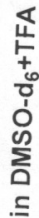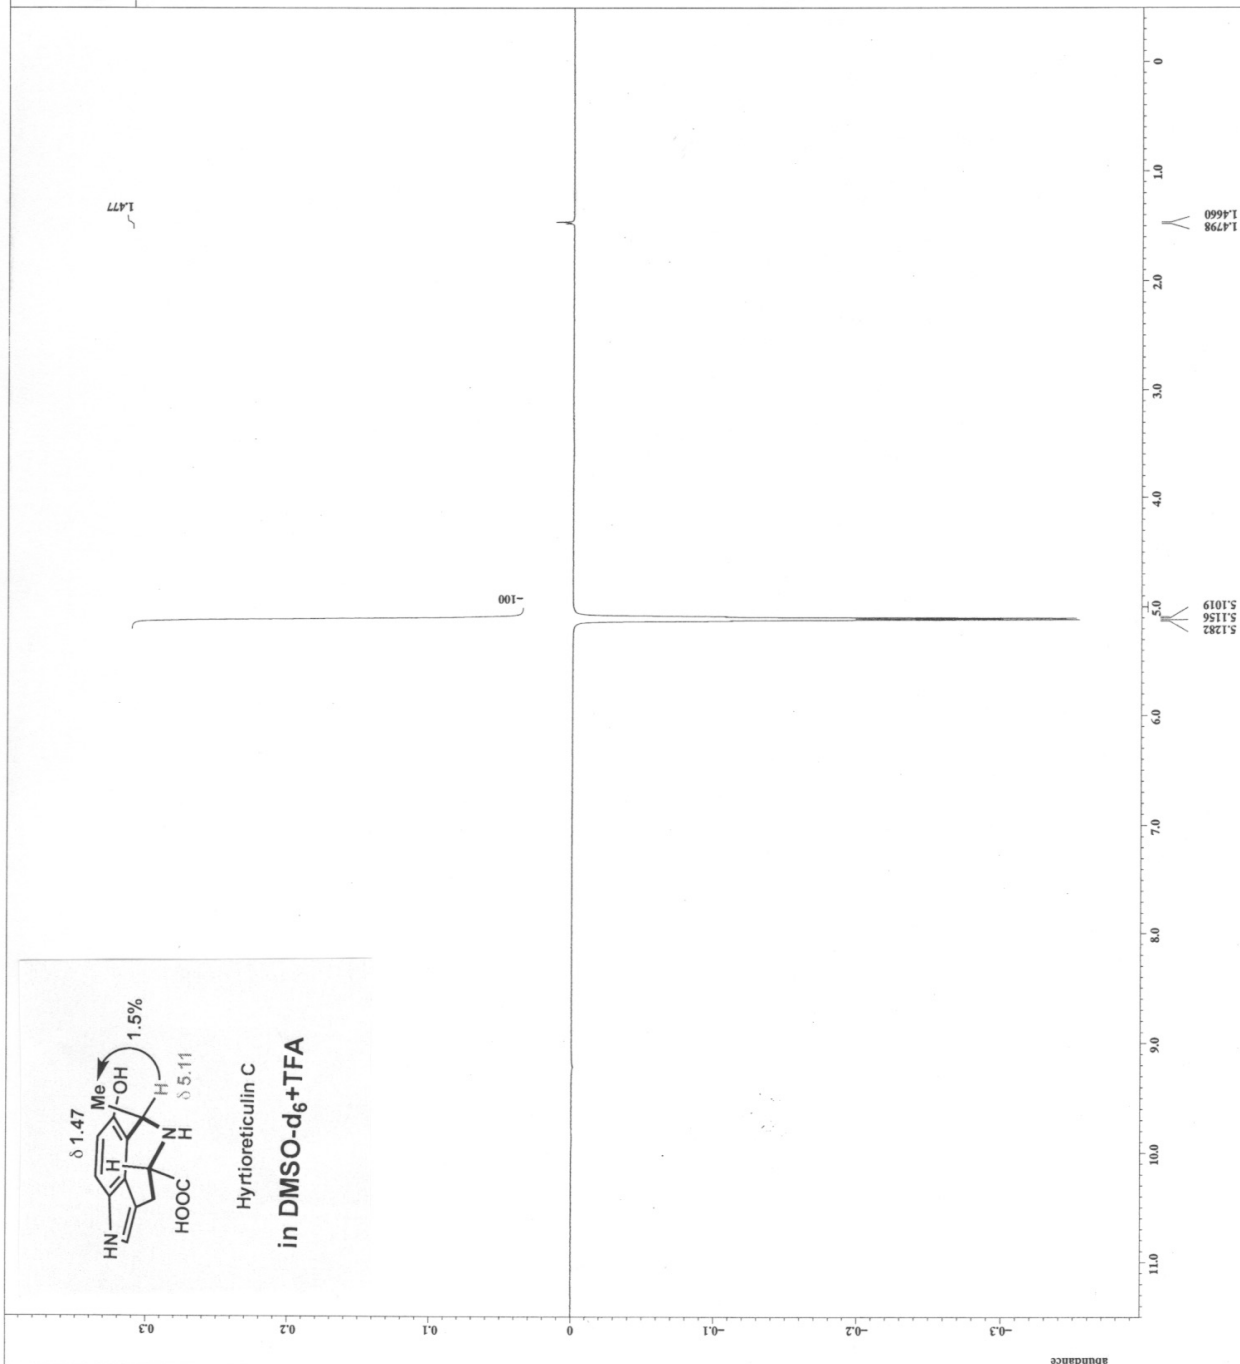

X : parts per Million : 1H



|                  |                           |
|------------------|---------------------------|
| FileNames        | = Birtlowinsulin_C17F1    |
| Author           | = daltla                  |
| Experiment       | = Birtlowinsulin_C17F1    |
| Solvent          | = DMSO-d6                 |
| Creation_time    | = 13-DEC-2015 20:41:50    |
| Creation_time    | = 13-DEC-2015 20:41:50    |
| Current_time     | = 20-DEC-2015 08:06:12    |
| Current_time     | = 20-DEC-2015 08:06:12    |
| Constant         | = DPMSE NOE 1d            |
| Content          | = 1D COMPLEX              |
| D1a_delay        | = 13107                   |
| D1a_delay        | = 13107                   |
| D1a_units        | = [µs]                    |
| Dimensions       | = X 30 640                |
| Spectrometer     | = MZT422_NMR              |
| Field_strength   | = 1.42936421 [T] (500.1M) |
| Frequency        | = 18.74429121 [MHz]       |
| Freq_offset      | = 495.13191398 [MHz]      |
| Freq_offset      | = 495.13191398 [MHz]      |
| F2_points        | = 10184                   |
| F2_points        | = 10184                   |
| F2_resolution    | = 2.4664949 [Hz]          |
| F2_resolution    | = 2.4664949 [Hz]          |
| F2_sweep         | = 9.28677563 [kHz]        |
| F2_sweep         | = 9.28677563 [kHz]        |
| F2_domain        | = 18.13191398 [MHz]       |
| F2_domain        | = 18.13191398 [MHz]       |
| F2_offset        | = 5 [µmol]                |
| F2_offset        | = 5 [µmol]                |
| F2_freq          | = 495.13191398 [MHz]      |
| F2_freq          | = 495.13191398 [MHz]      |
| F2_phase         | = FALSE                   |
| F2_phase         | = FALSE                   |
| F2_Clipped       | = 1                       |
| F2_Clipped       | = 1                       |
| Mod_return       | = 1                       |
| Mod_return       | = 1                       |
| Total_scans      | = 1024                    |
| Total_scans      | = 1024                    |
| Acq_time         | = 1.76433912 [s]          |
| Acq_time         | = 1.76433912 [s]          |
| Acq_n            | = 3.6160                  |
| Acq_n            | = 3.6160                  |
| Acq_pulse        | = 13.7 [µs]               |
| Acq_pulse        | = 13.7 [µs]               |
| Obs_sel_180      | = 20 [µs]                 |
| Obs_sel_180      | = 20 [µs]                 |
| Obs_sel_atn      | = 51.736 [dB]             |
| Obs_sel_atn      | = 51.736 [dB]             |
| Obs_sel_offset   | = 0.000000 [ppm]          |
| Obs_sel_offset   | = 0.000000 [ppm]          |
| Obs_sel_alp      | = 5.1156 [ppm]            |
| Obs_sel_alp      | = 5.1156 [ppm]            |
| Tr_mode          | = OF2                     |
| Tr_mode          | = OF2                     |
| Grd_1_offset     | = 1 [ms]                  |
| Grd_1_offset     | = 1 [ms]                  |
| Grd_1_amp        | = 20 [µs]                 |
| Grd_1_amp        | = 20 [µs]                 |
| Grd_2_amp        | = 30 [µs]                 |
| Grd_2_amp        | = 30 [µs]                 |
| Grd_3_amp        | = 1 [ms]                  |
| Grd_3_amp        | = 1 [ms]                  |
| Grd_4_offset     | = 0.1 [ms]                |
| Grd_4_offset     | = 0.1 [ms]                |
| Grd_4_phase      | = 23.98 [°]               |
| Grd_4_phase      | = 23.98 [°]               |
| Initial_wait     | = 50                      |
| Initial_wait     | = 50                      |
| Recvr_gain       | = 1 [s]                   |
| Recvr_gain       | = 1 [s]                   |
| Relaxation_delay | = 7 [s]                   |
| Relaxation_delay | = 7 [s]                   |
| Relaxation_time  | = 1.76433912 [s]          |
| Relaxation_time  | = 1.76433912 [s]          |
| Retention        | = 20.42 [min]             |
| Retention        | = 20.42 [min]             |

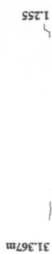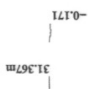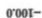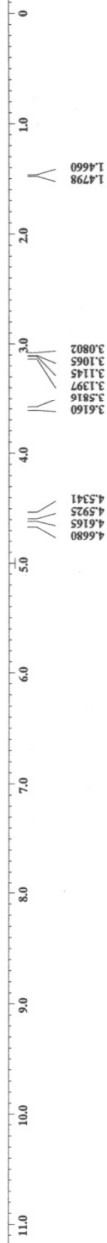

X : parts per Million : 1H

[illegible]

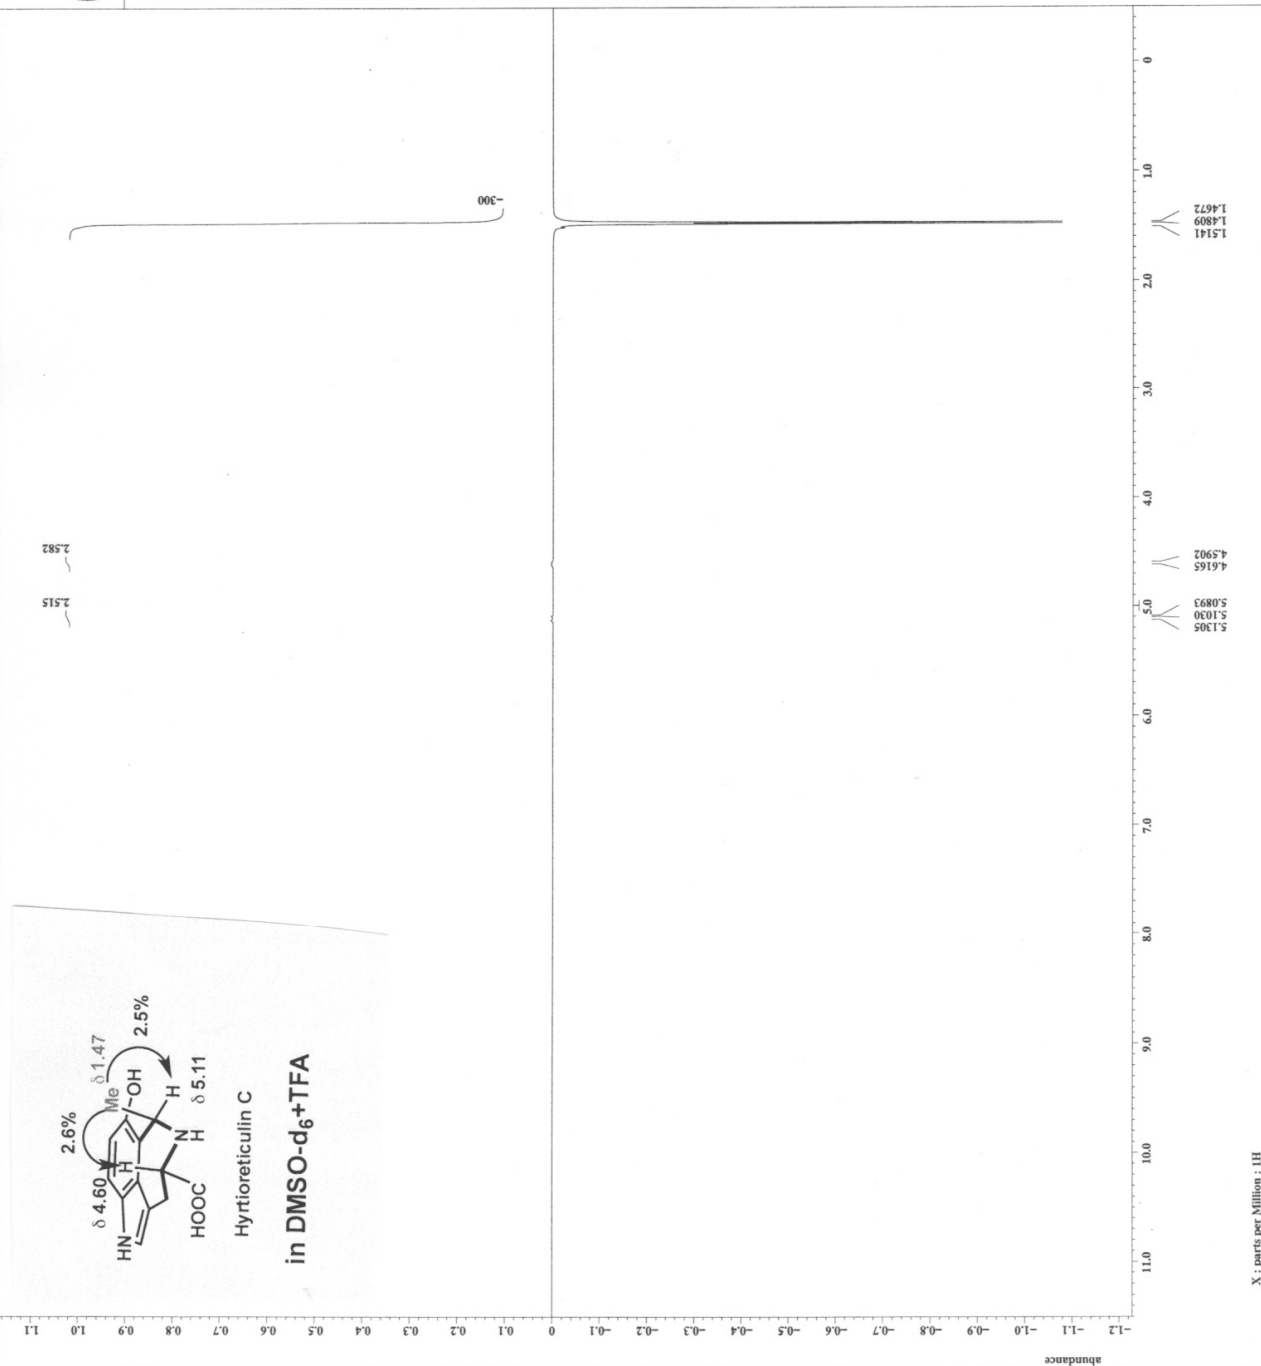

File name = Hyrtioreticulic C.TFA  
 Experiment =  
 Sample\_id = nos\_1d\_dpfgse.ex  
 Date\_acq = 20-DEC-2016 02:00:17  
 Creation\_time = 20-DEC-2016 08:07:36  
 Revision\_time = 20-DEC-2016 08:07:55  
 Current\_time =  
 Content = DFGSE NOE 1d  
 Data\_format = ID COMPLEX  
 Data\_title = 1D  
 Dia\_units = [ppm]  
 Dimensions = FCA 500  
 Size = DELTA2\_MNR  
 Spectrometer =  
 Field\_strength = 11.42026421(T) (500[M]  
 X\_acq\_duration = 1.76422912[s]  
 X\_domain = 1H -13131398[NHz]  
 X\_offset = 5[ppm]  
 X\_points = 16384  
 X\_prescans = 0  
 X\_resolution = 0.5668198[Hz]  
 X\_sweep = 9.28677563[NHz]  
 Xrr\_domain = 1H -13131398[NHz]  
 Xrr\_offset = 5[ppm]  
 Tri\_domain = 1H -13131398[NHz]  
 Tri\_offset = 5[ppm]  
 Clipped = FALSE  
 Mod\_return = 1034  
 Total\_scans = 1024  
 X\_acq\_time = 1.76422912[s]  
 X\_pulse = 12.7[us]  
 Xrr\_mode\_180 = Off[ms]  
 Obs\_sel\_atn = 53.756[db]  
 Obs\_sel\_offset = 1.4798[ppm]  
 Obs\_sel\_offset = 1.4798[ppm]  
 Obs\_sel\_offset = 1.4798[ppm]  
 Tri\_mode = Off  
 Data\_presat = 1[ms]  
 Grad\_1\_amp = 20[%]  
 Grad\_2\_amp = 1[ms]  
 Grad\_3\_amp = 1[ms]  
 Grad\_4\_amp = 10[%]  
 Grad\_5\_amp = 1[ms]  
 Grad\_6\_amp = 1[ms]  
 Grad\_shape = SINE  
 Initial\_wait = 1[s]  
 Mix\_time = 0.5[s]  
 Relaxation\_delay = 7[s]  
 Repetition\_time = 8.76422912[s]  
 Temp\_gvt = 21.9[OC]



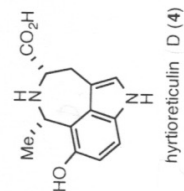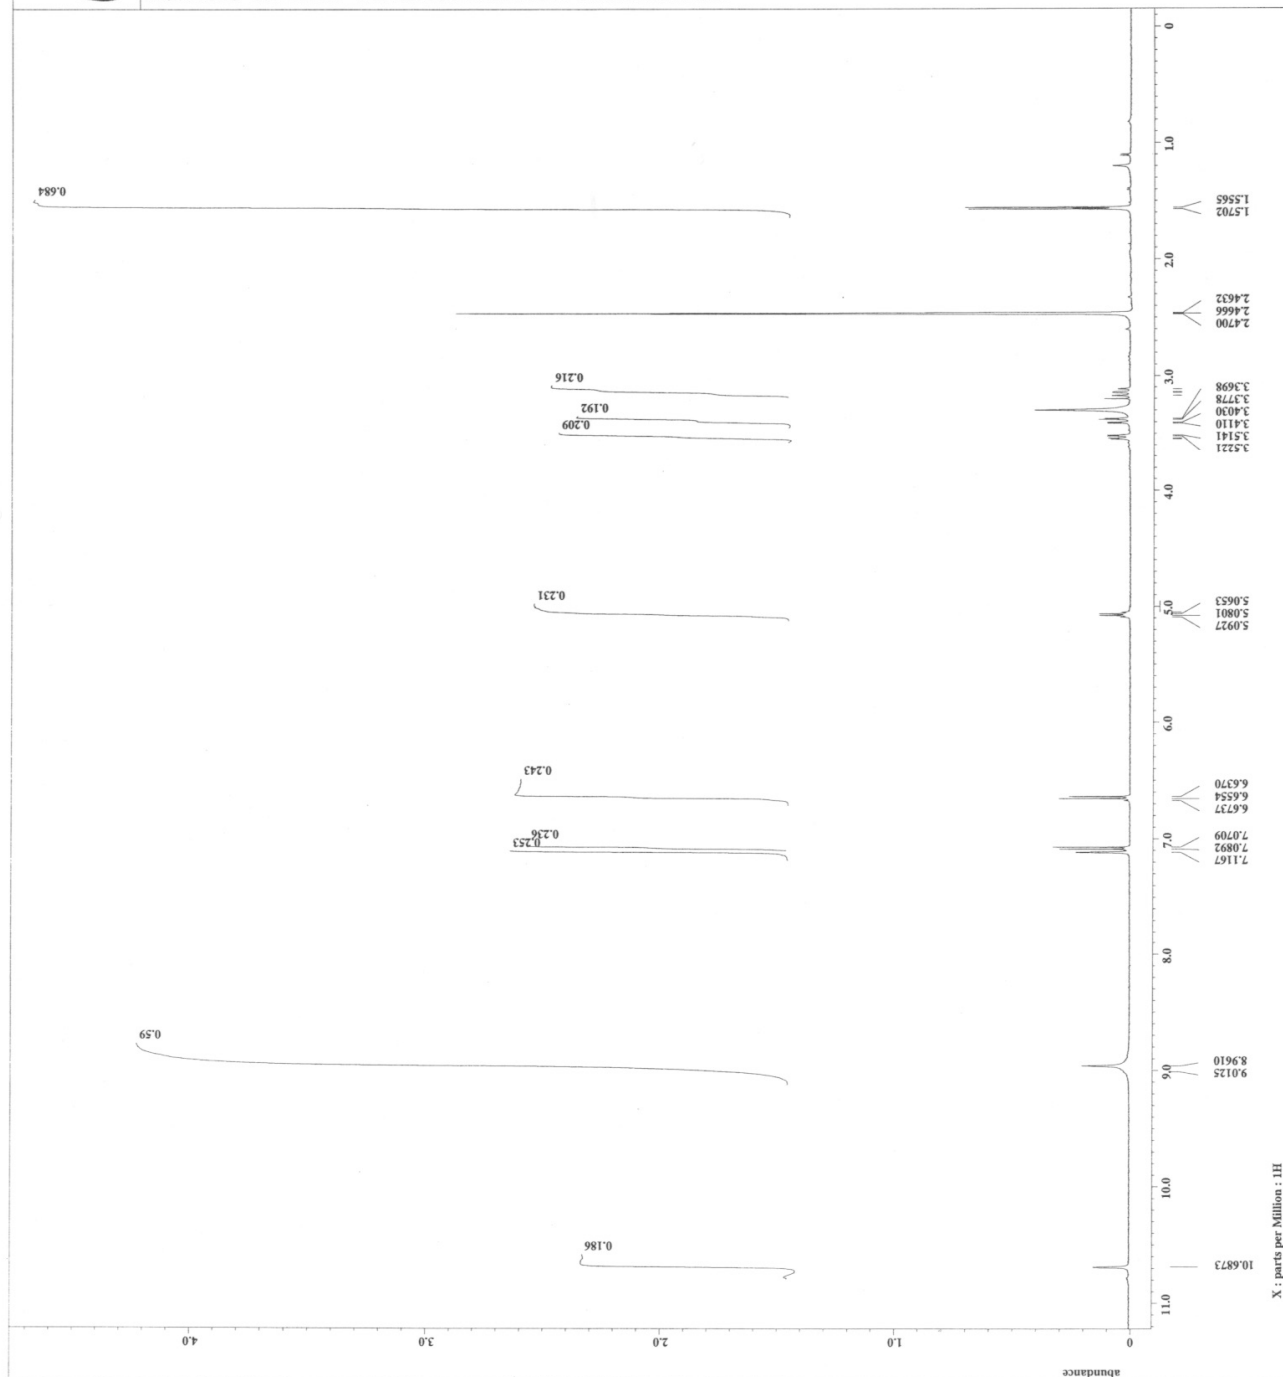

Filename = Hyrtioreticulin-D-1ra  
 Sample = single\_pulse\_en2  
 Sample\_id = 8836339  
 Experiment = 6-DEC-2016 09:55:52  
 Revision\_time = 6-DEC-2016 10:10:10  
 Current\_time = 6-DEC-2016 10:10:12  
 Content = single\_pulse  
 Data\_format = 1D COMPLEX  
 Data\_size = 13107  
 Dia\_units = [ppm]  
 Dimensions = 512  
 Size = ECA 500  
 Spectrometer = DELTA2 NMR  
 Field\_strength = 11.62926421[T] (500[M]  
 X\_acq\_duration = 1.76422912[s]  
 X\_domain = 1H  
 X\_offset = 165.13191398[MHz]  
 X\_points = 512  
 X\_resolution = 16384  
 X\_sweep = 0.5668198[Hz]  
 Irr\_domain = 1H  
 Irr\_offset = 165.13191398[MHz]  
 Tri\_domain = 1H  
 Tri\_offset = 165.13191398[MHz]  
 Tri\_resolution = 512  
 Tri\_offset = 165.13191398[MHz]  
 Clipped = FALSE  
 Recv\_return = 8  
 Total\_scans = 8  
 X\_90\_width = 12.7[us]  
 X\_acq\_time = 1.76422912[s]  
 X\_angle = 45[deg]  
 X\_delay = 6.35[us]  
 X\_pulse = OFF  
 Irr\_mode = OFF  
 Irr\_delay = 1[us]  
 Data\_preset = FALSE  
 Initial\_wait = 1[s]  
 Recv\_gain = 48  
 Repetition\_delay = 6.76422912[s]  
 Repetition\_time = 20.6[dc]  
 Temp\_get =

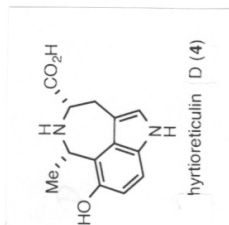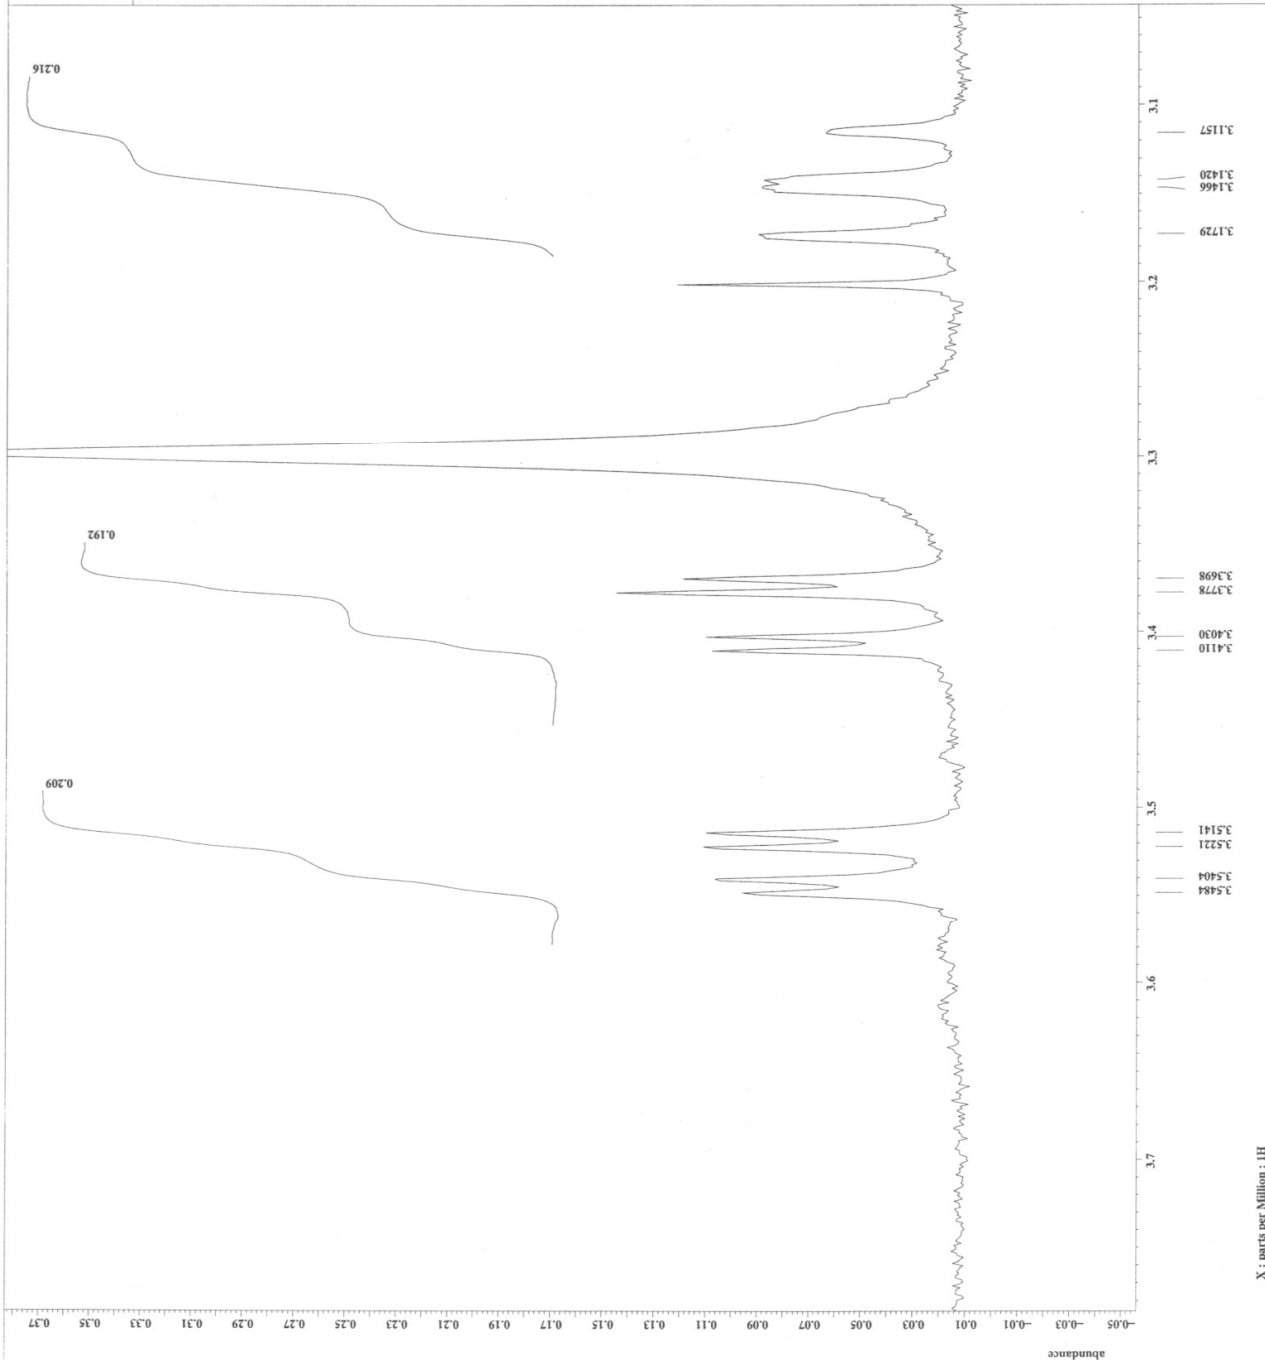

Filename = hyrtioreticulind2\_cop  
 Author = Delta  
 Experiment = single\_pulse\_dec  
 Date\_acq = 2016-12-08  
 Solvent = DMSO-d6  
 Creation\_time = 8-DEC-2016 14:24:22  
 Revision\_time = 8-DEC-2016 14:36:17  
 Current\_time = 8-DEC-2016 14:39:10  
 Content = single pulse decouple  
 Data format = 1D F2  
 Data size = 26214  
 Dim title = 13C  
 Dim units = [ppm]  
 Dimensions = 1  
 Site = ECA 500  
 Spectrometer = DELTA2\_MMR  
 Field\_strength = 11.62926421(T) (500 MHz)  
 X\_acq\_duration = 0.838860(s)  
 X\_domain = 13C  
 X\_offset = 5010059 [MHz]  
 X\_points = 100 [ppm]  
 X\_resolution = 32768  
 X\_sweep = 1.1920929 [Hz]  
 X\_sweep\_rate = 39.0625 [kHz]  
 Irr\_domain = 485.1131398 [MHz]  
 Irr\_offset = 5 [ppm]  
 Clipped = FALSE  
 Modulated\_wave\_copy = TRUE  
 Mod\_return = 1  
 Scans = 2489  
 Total\_scans = 2489  
 X\_90\_width = 10.6 [us]  
 X\_acq\_time = 0.838860(s)  
 X\_resolution = 32768  
 X\_resolution\_ppm = 9.8 [dB]  
 X\_pulse = 3.5333333 [us]  
 Irr\_atn\_dec = 20 [dB]  
 Irr\_atn\_swept = 20 [dB]  
 Irr\_noise = WALTZ  
 Decoupling = TRUE  
 Nutation\_wait = 1 [s]  
 Noe\_time = 2 [s]  
 Repetition\_delay = 5 [s]  
 Repetition\_time = 2.838860(s)  
 Temp\_get = 21.6 (°C)

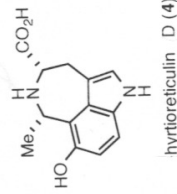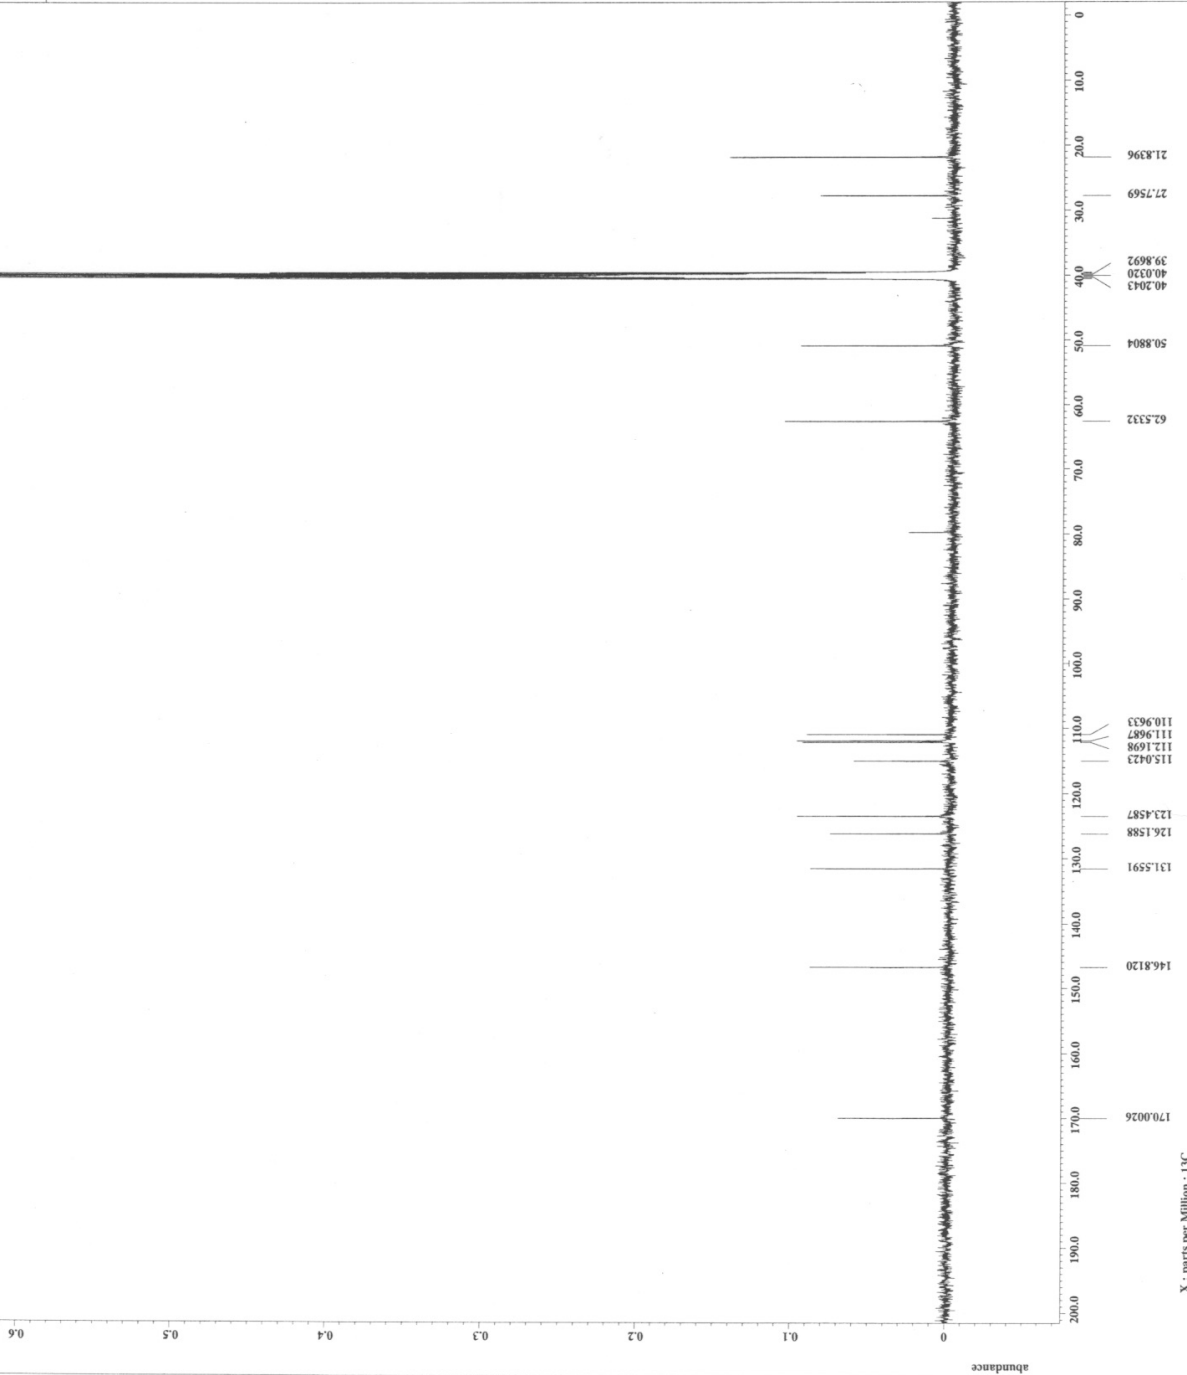

X : parts per Million : 13C

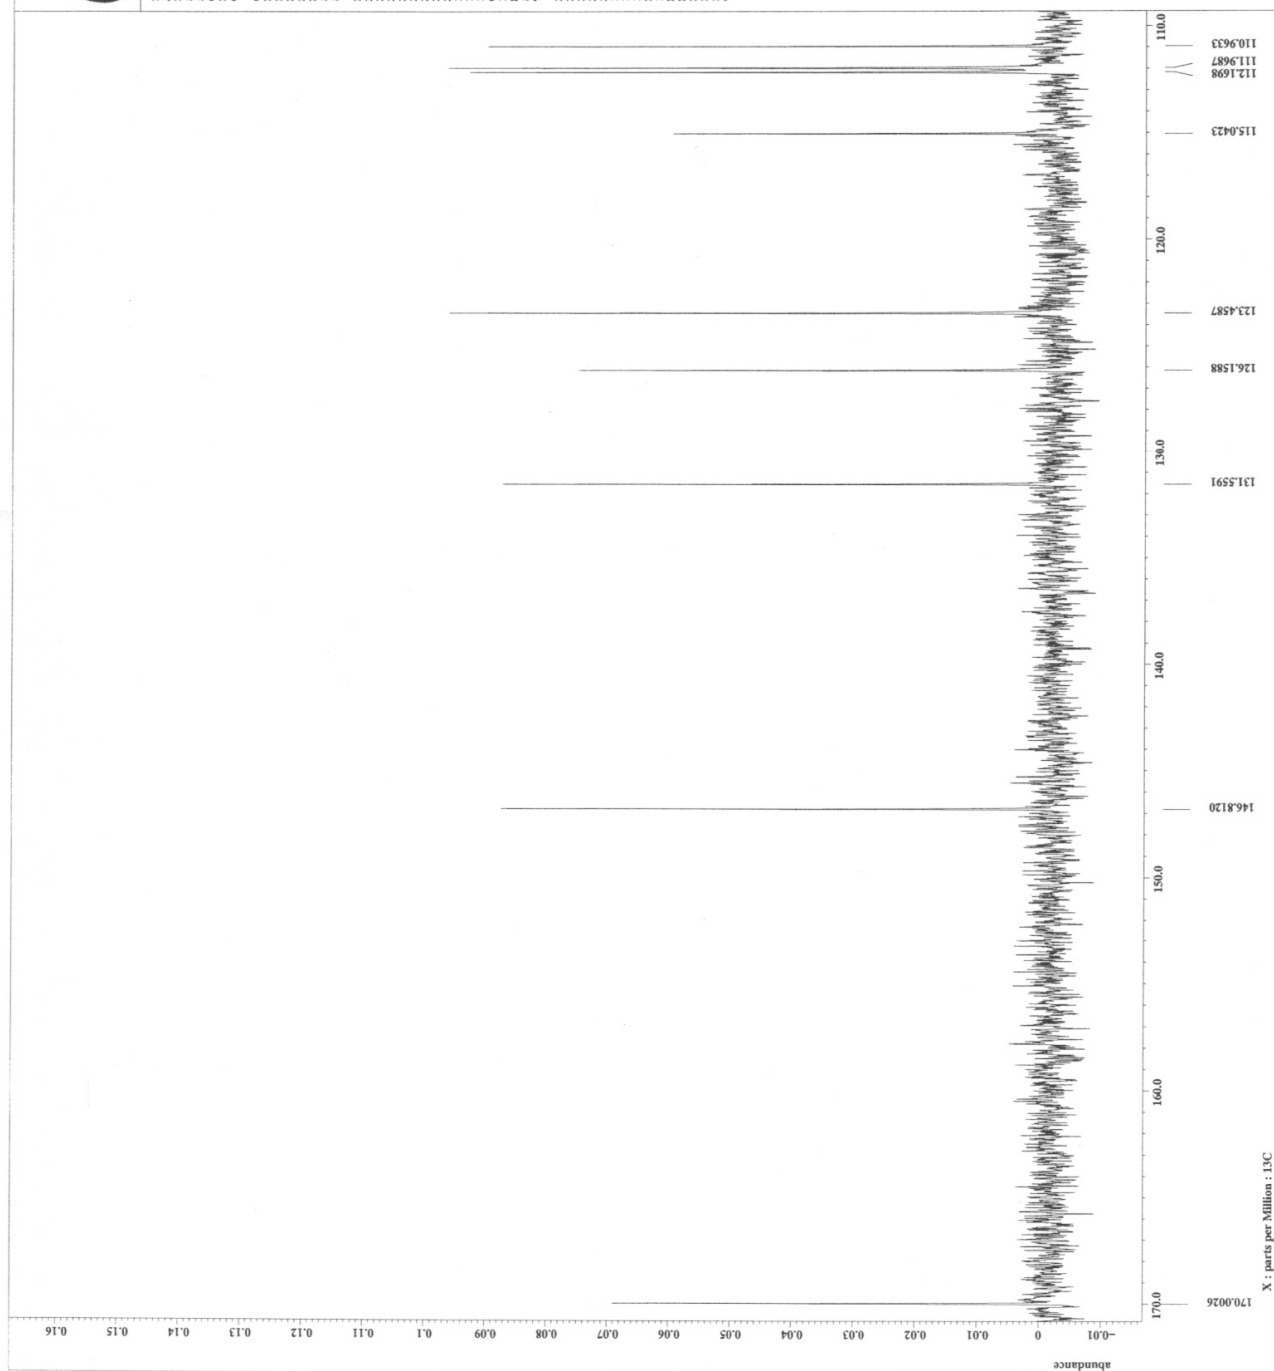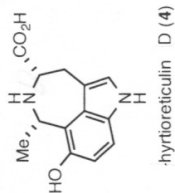

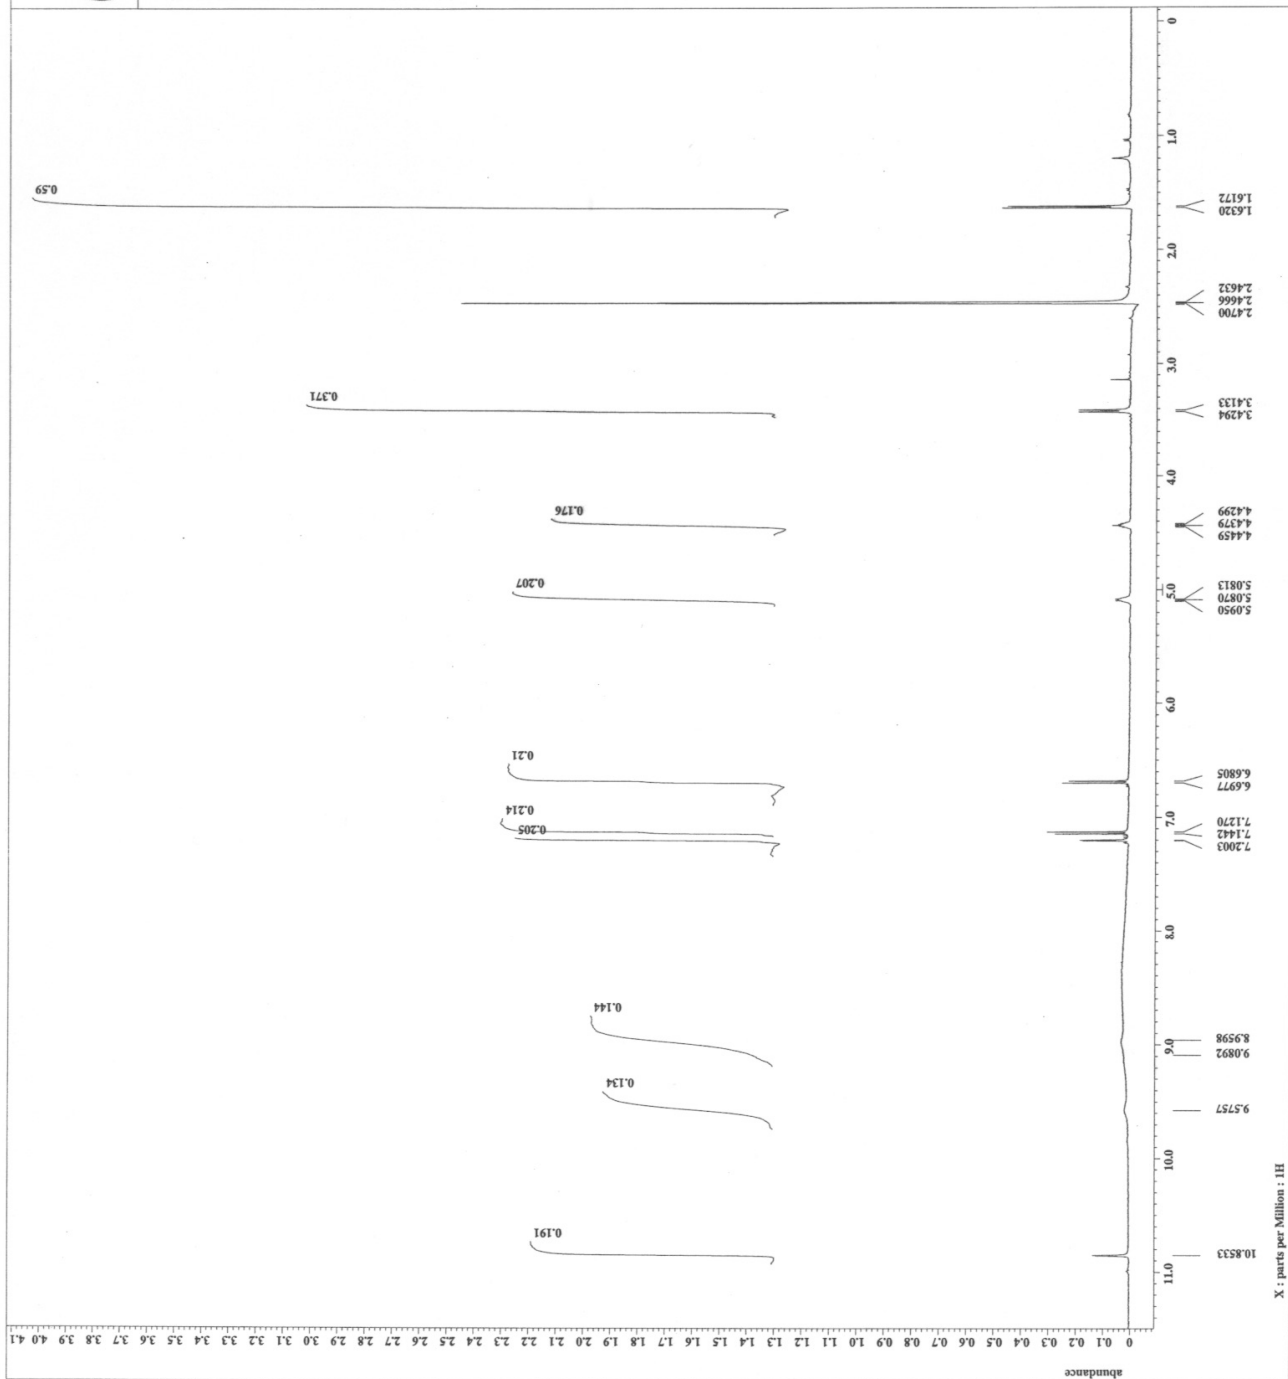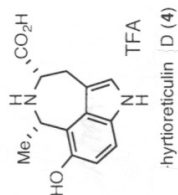

Filename = hyrtioreticulin-D2-TF  
 Author = delta  
 Experiment = single\_pulse.ac2  
 Solvent = DMSO-d6  
 Creation\_time = 10-MCC-2016 14:23:10  
 Acquisition\_time = 10-MCC-2016 14:23:12  
 Current\_time = 10-MCC-2016 14:23:22  
 Content = 1D COMPLEX  
 Data\_format = 1D COMPLEX  
 Dia\_size = 13107  
 Dia\_unit = [mm]  
 Dimensions = X  
 Site = RCA 500  
 Spectrometer = spectrometer  
 Field\_strength = 11.62936421 [T] [500 MHz]  
 X\_resolution = 11.62936421 [Hz]  
 X\_domain = 1H [644229121s]  
 X\_freq = 495.13191398 [MHz]  
 X\_offset = 13394  
 X\_pulses = 13394  
 X\_prescans = 1  
 X\_resolution = 1.866194 [Hz]  
 X\_resolution = 9.28677563 [Hz]  
 Irr\_domain = 1H  
 Irr\_freq = 595.13191398 [MHz]  
 Tri\_domain = 1H  
 Tri\_freq = 495.13191398 [MHz]  
 Mod\_return = 1  
 Total\_scans = 8  
 X\_90\_width = 12.7 [us]  
 X\_acq\_time = 1.764229121s  
 X\_angle = 45 [deg]  
 X\_offset = 13394  
 X\_pulse = 6.35 [us]  
 Irr\_mode = Off  
 Tri\_mode = Off  
 Dam\_presat = PRSG  
 Initial\_wait = 1[s]  
 Recv\_gain\_delay = 5[s]  
 Repetition\_time = 6.764229121s  
 Temp\_get = 21.4 [deg]

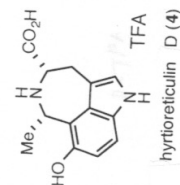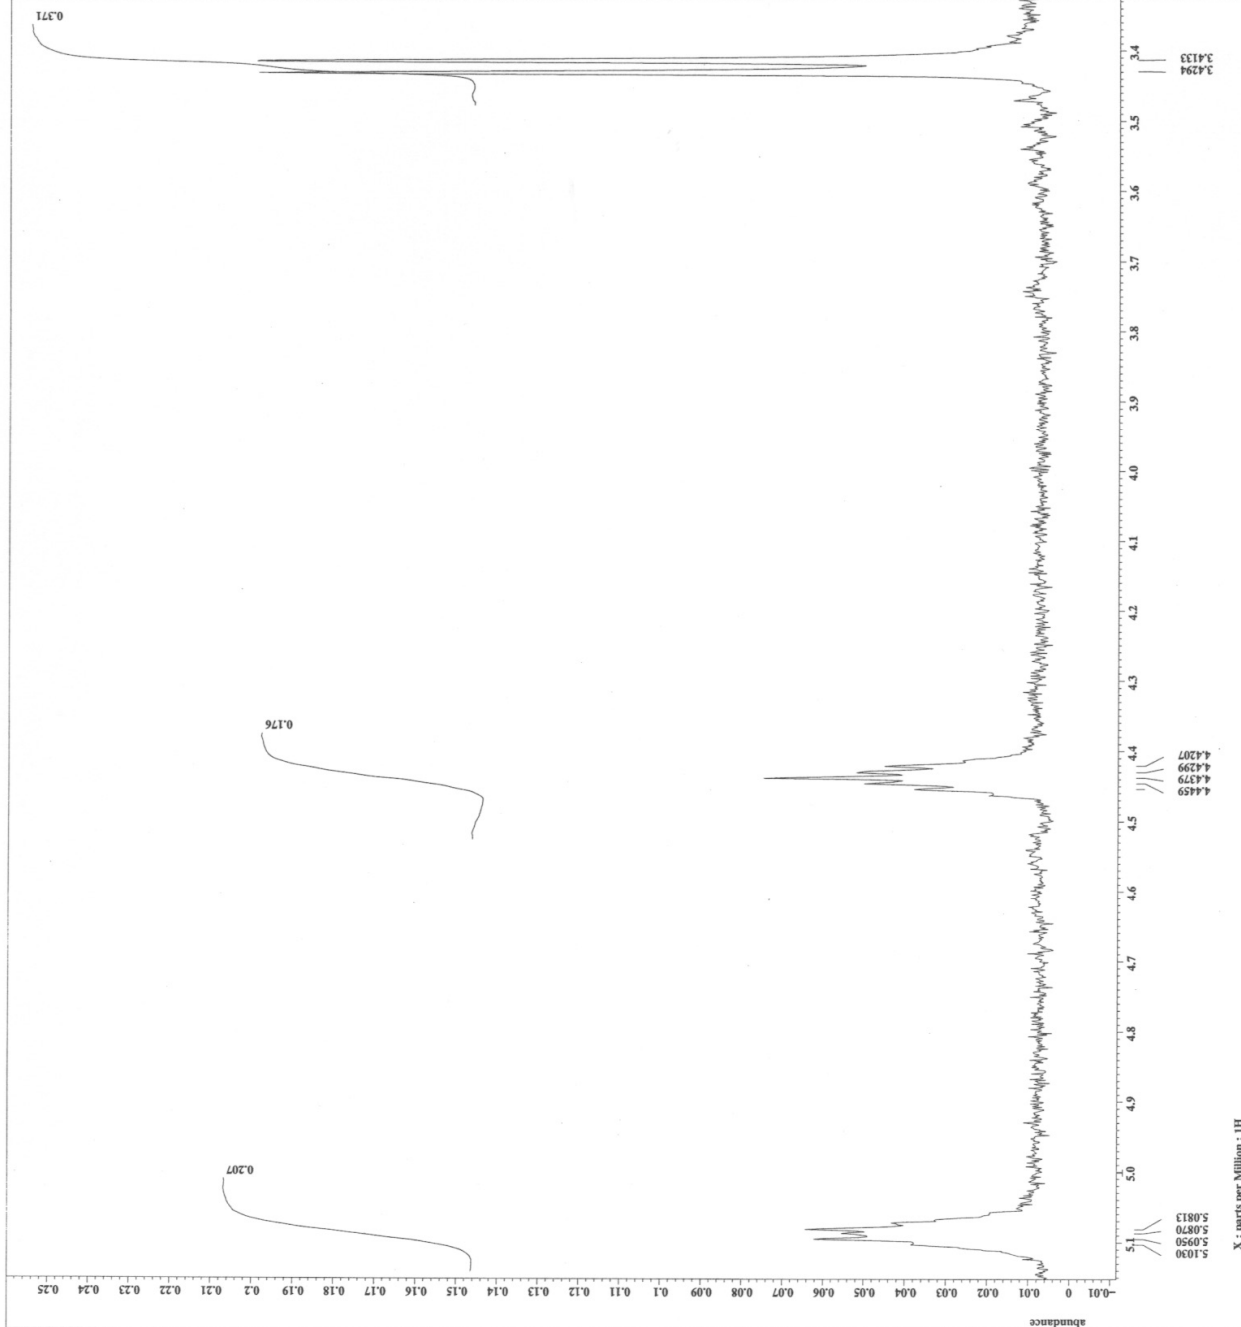

|                    |                         |
|--------------------|-------------------------|
| File name          | Wf10rte06collin-025-27  |
| Author             | Galila                  |
| Experiment         | Superimposed            |
| Software           | EMSD-06                 |
| Solvent            | DMSO-d6                 |
| Creation time      | 12-DEC-2016 08:10:18    |
| Creation date      | 2016-12-12              |
| Current time       | 12-DEC-2016 08:10:27    |
| Current date       | 2016-12-12              |
| Content            | 100% pulse decouple     |
| Data format        | 1D CompZxtk             |
| Dir name           | 20214                   |
| Dir path           | 20214                   |
| D1C units          | 13C                     |
| Dimensions         | X                       |
| Site               | 13C                     |
| Spectrometer       | ECA 500                 |
| Field_strength     | 500.13 MHz              |
| Field_frequency    | 125.7606421 [T] 500 [M] |
| X_freq             | 125.7606421 [MHz]       |
| X_channel          | 13C                     |
| Y_freq             | 125.7606421 [MHz]       |
| Y_channel          | 13C                     |
| Z_freq             | 125.7606421 [MHz]       |
| Z_channel          | 13C                     |
| X_points           | 2727 [pts]              |
| Y_points           | 4                       |
| Z_points           | 4                       |
| Acquisition        | 1.1920929 [Hz]          |
| Relaxation         | 1H 0.622 [Hz]           |
| Excitation         | 495.13191396 [MHz]      |
| Excitation_freq    | 495.13191396 [MHz]      |
| Excitation_channel | 1H                      |
| Decoupled          | FALSE                   |
| Mod_return         | 1                       |
| Mod_name           | 0001                    |
| Procr_name         | 22881                   |
| K0_offset          | 0.0 [Hz]                |
| K0_width           | 30.0 [Hz]               |
| K0_sqc_time        | 30 [sec]                |
| K_angle            | 9.4 [deg]               |
| K_offset           | 9.4 [deg]               |
| K_width            | 323 [us]                |
| Arrr_atn_dec       | 20.8 [dB]               |
| Arrr_atn_spc       | 20.8 [dB]               |
| Arrr_atn_rec       | 20.8 [dB]               |
| Decoupling         | WALTZ                   |
| Initial_waltz      | 1 [s]                   |
| Recr_gain          | 2101                    |
| Recr_time          | 60 [s]                  |
| Relaxation_delay   | 1 [s]                   |
| Relaxation_time    | 31 [sec]                |
| Temp_set           | 21.7 [deg]              |

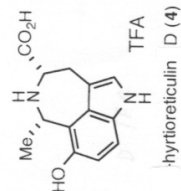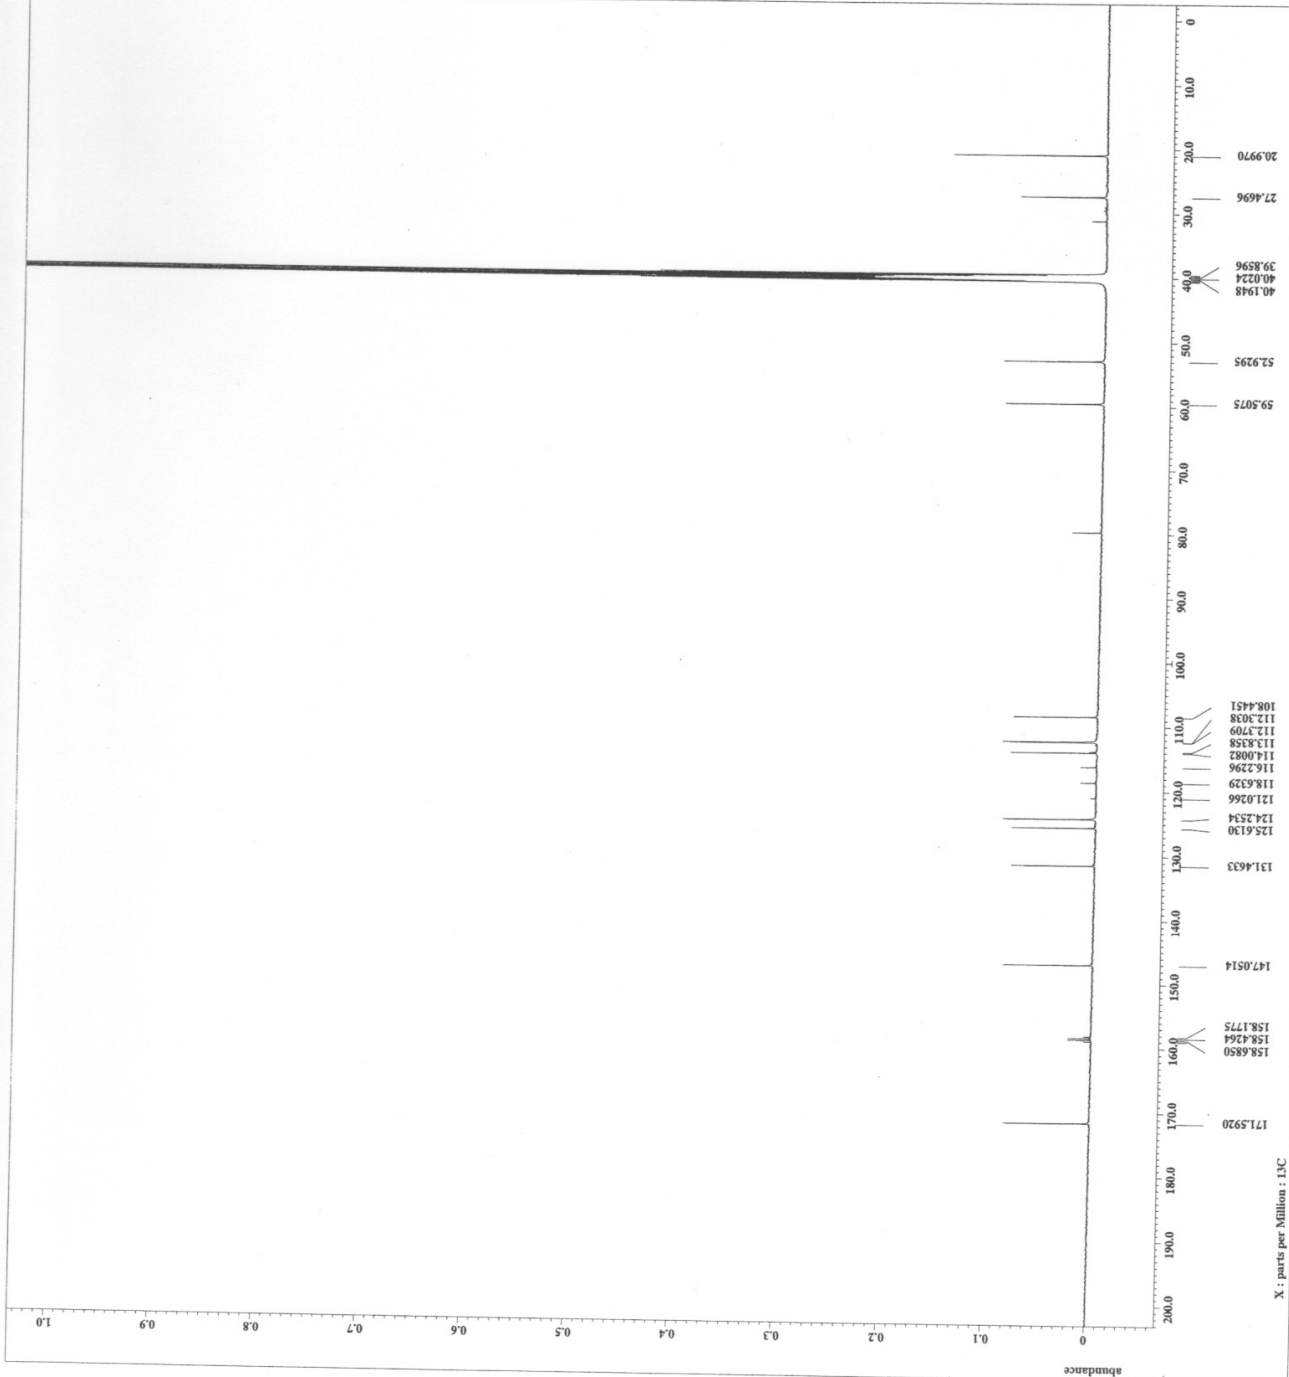

|            |         |
|------------|---------|
| Filename   | Content |
| Author     | Content |
| Experiment | Content |
| Sample_id  | Content |
| Solvent    | Content |
| Creation   | Content |
| Revision   | Content |
| Current_t  | Content |
| Dim1       | Content |
| Dim2       | Content |
| Dim3       | Content |
| Dim4       | Content |
| Dim5       | Content |
| Dim6       | Content |
| Dim7       | Content |
| Dim8       | Content |
| Dim9       | Content |
| Dim10      | Content |
| Dim11      | Content |
| Dim12      | Content |
| Dim13      | Content |
| Dim14      | Content |
| Dim15      | Content |
| Dim16      | Content |
| Dim17      | Content |
| Dim18      | Content |
| Dim19      | Content |
| Dim20      | Content |
| Dim21      | Content |
| Dim22      | Content |
| Dim23      | Content |
| Dim24      | Content |
| Dim25      | Content |
| Dim26      | Content |
| Dim27      | Content |
| Dim28      | Content |
| Dim29      | Content |
| Dim30      | Content |
| Dim31      | Content |
| Dim32      | Content |
| Dim33      | Content |
| Dim34      | Content |
| Dim35      | Content |
| Dim36      | Content |
| Dim37      | Content |
| Dim38      | Content |
| Dim39      | Content |
| Dim40      | Content |
| Dim41      | Content |
| Dim42      | Content |
| Dim43      | Content |
| Dim44      | Content |
| Dim45      | Content |
| Dim46      | Content |
| Dim47      | Content |
| Dim48      | Content |
| Dim49      | Content |
| Dim50      | Content |
| Dim51      | Content |
| Dim52      | Content |
| Dim53      | Content |
| Dim54      | Content |
| Dim55      | Content |
| Dim56      | Content |
| Dim57      | Content |
| Dim58      | Content |
| Dim59      | Content |
| Dim60      | Content |
| Dim61      | Content |
| Dim62      | Content |
| Dim63      | Content |
| Dim64      | Content |
| Dim65      | Content |
| Dim66      | Content |
| Dim67      | Content |
| Dim68      | Content |
| Dim69      | Content |
| Dim70      | Content |
| Dim71      | Content |
| Dim72      | Content |
| Dim73      | Content |
| Dim74      | Content |
| Dim75      | Content |
| Dim76      | Content |
| Dim77      | Content |
| Dim78      | Content |
| Dim79      | Content |
| Dim80      | Content |
| Dim81      | Content |
| Dim82      | Content |
| Dim83      | Content |
| Dim84      | Content |
| Dim85      | Content |
| Dim86      | Content |
| Dim87      | Content |
| Dim88      | Content |
| Dim89      | Content |
| Dim90      | Content |
| Dim91      | Content |
| Dim92      | Content |
| Dim93      | Content |
| Dim94      | Content |
| Dim95      | Content |
| Dim96      | Content |
| Dim97      | Content |
| Dim98      | Content |
| Dim99      | Content |
| Dim100     | Content |
| Dim101     | Content |
| Dim102     | Content |
| Dim103     | Content |
| Dim104     | Content |
| Dim105     | Content |
| Dim106     | Content |
| Dim107     | Content |
| Dim108     | Content |
| Dim109     | Content |
| Dim110     | Content |
| Dim111     | Content |
| Dim112     | Content |
| Dim113     | Content |
| Dim114     | Content |
| Dim115     | Content |
| Dim116     | Content |
| Dim117     | Content |
| Dim118     | Content |
| Dim119     | Content |
| Dim120     | Content |
| Dim121     | Content |
| Dim122     | Content |
| Dim123     | Content |
| Dim124     | Content |
| Dim125     | Content |
| Dim126     | Content |
| Dim127     | Content |
| Dim128     | Content |
| Dim129     | Content |
| Dim130     | Content |
| Dim131     | Content |
| Dim132     | Content |
| Dim133     | Content |
| Dim134     | Content |
| Dim135     | Content |
| Dim136     | Content |
| Dim137     | Content |
| Dim138     | Content |
| Dim139     | Content |
| Dim140     | Content |
| Dim141     | Content |
| Dim142     | Content |
| Dim143     | Content |
| Dim144     | Content |
| Dim145     | Content |
| Dim146     | Content |
| Dim147     | Content |
| Dim148     | Content |
| Dim149     | Content |
| Dim150     | Content |
| Dim151     | Content |
| Dim152     | Content |
| Dim153     | Content |
| Dim154     | Content |
| Dim155     | Content |
| Dim156     | Content |
| Dim157     | Content |
| Dim158     | Content |
| Dim159     | Content |
| Dim160     | Content |
| Dim161     | Content |
| Dim162     | Content |
| Dim163     | Content |
| Dim164     | Content |
| Dim165     | Content |
| Dim166     | Content |
| Dim167     | Content |
| Dim168     | Content |

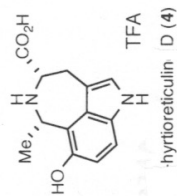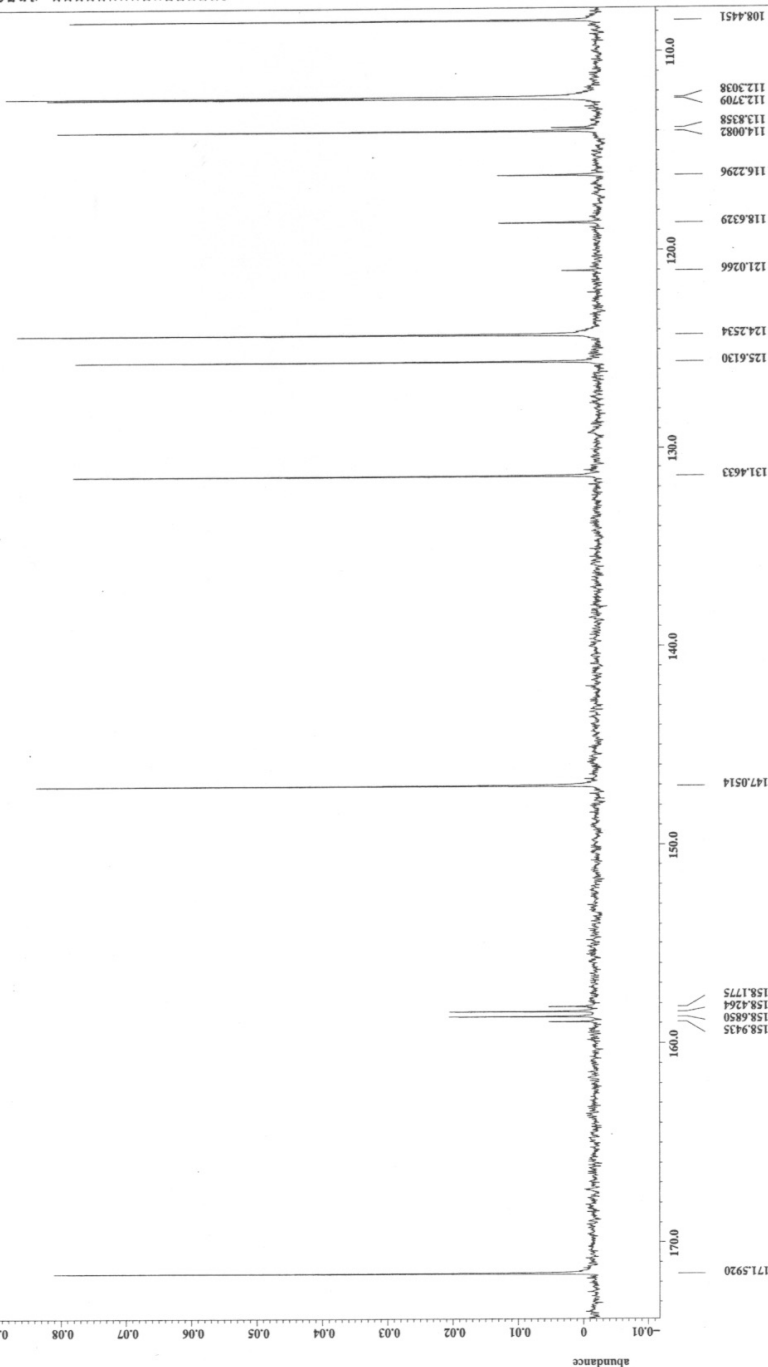

X : parts per Million : 13C



in DMSO-d<sub>6</sub>+TFA

1.95

The logo for JOEAL features the word "JOEAL" in a bold, sans-serif font. To the left of the text is a stylized graphic element consisting of a triangle with a circle inside it, and a line that loops around the triangle and ends in a small circle, resembling a stylized 'J' or a mechanical part.

```

-----
PROCESSING PARAMETERS
mc_balance: 0 : FALSE
exp: 0.2 [Hz] : 0.0 [s]
arazozeoid: 0 [s] : 80 [s] : 100 [%]
zerofill: 1
fft: 1 : TRUE : TRUE
ppm
Phase: 167 : 0 : 50 [%]

```

Derived from: Hyrtioreticulin D+TFA-4.jd

[illegible]

001-

1.6354  
1.6205

6580'S  
9660'S

X : parts per Million : 1H

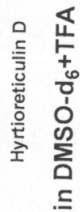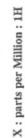The logo for JOEAL, featuring the word "JOEAL" in a bold, sans-serif font, with a stylized graphic element resembling a triangle or a stylized letter 'A' integrated into the letter 'A'.

```

----- PROCESSING PARAMETERS -----
dc balance: 0 : false
sorp : 0.3 [Hz] : 0.0 [s]
trapzoid: 0 [%] : 80 [%] : 100 [%]
zerofill : 1
fft : 1 : TRUE : TRUE
pwm
phase : 164 : 0 : 50 [%]

```

Derived from: Myrtiozoculin D-TFA

|                   |                              |
|-------------------|------------------------------|
| Filename          | F:\vireticolin.D\F7F         |
| Author            | = data                       |
| Experiment        | = nom_id_0fsgse.exe          |
| SampleId          | = NOM-D6                     |
| Solvent           | = 15-DEC-2016 20:49:48       |
| Creation_time     | = 20-DEC-2016 08:51:53       |
| Current_time      | = 20-DEC-2016 08:53:02       |
| Comment           |                              |
| Data_format       | = SPX025_NMR id              |
| Dia_name          | = 11_CPM2D_X                 |
| Dia_title         | = 1107                       |
| Dimensions        | = [ppm]                      |
| Size              | = EGAS600                    |
| Appoperator       | = DZS2A1_NMR                 |
| Field_strength    | = 11.7473579 [G] (500 [MHz]) |
| Acquisition       | = 11.747357904 [s]           |
| X_domain          | = 50.15999452 [MHz]          |
| Y_freq            | = 13.8 [Hz]                  |
| X_offset          | = 13.8 [Hz]                  |
| X_center          | = 2                          |
| X_resolution      | = 0.37277737 [Hz]            |
| X_resolution_min  | = 18.358488 [Hz]             |
| X_freq            | = 50.15999452 [MHz]          |
| Y1_domain         | = 18.358 [ppm]               |
| Y1_freq           | = 50.15999452 [MHz]          |
| Y1_offset         | = 18.358 [ppm]               |
| Y1_resolution     | = 0.37277737 [Hz]            |
| Y1_resolution_min | = 18.358 [ppm]               |
| Y1_center         | = 2                          |
| Mod_return        | = 124                        |
| Total_points      | = 124                        |
| X_acq_time        | = 1.747357904 [s]            |
| X_pulse           | = 11.8 [us]                  |
| Xir_psd           | = OFZ                        |
| Xir_psd_0         | = 54.235 [dB]                |
| Obs_ref_sfn       | = 1.6354 [ppm]               |
| Obs_ref_offset    | = 1.6354 [ppm]               |
| Obs_ref_gain      | = 1.6354 [ppm]               |
| Obs_ref_slp       | = OFZ                        |
| Xir_psd_max       | = 54.235 [dB]                |
| Grad_1_amp        | = 66 [mT/m]                  |
| Grad_2_amp        | = 90 [mT/m]                  |
| Grad_3_amp        | = 1 [mT/m]                   |
| Grad_4_amp        | = 30 [mT/m]                  |
| Grad_shape        | = SINE                       |
| Initial_wait      | = 1[s]                       |
| Nucv_gain         | = 50 [s]                     |
| Relaxation_delay  | = 7[s] ppgg904[s]            |
| Relaxation_time   | = 22.1 [s]                   |

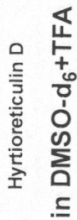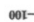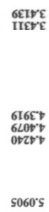

X : parts per Million : 1H



```
----- PROCESSING PARAMETERS -----
ddc_balance : 0 : FALSE
ddc_exp : 0.2 [Hz] : 0.0 [s]
trazodol : 0.0 [g] : 0.0 [g]
trazodol3 : 0.0 [g] : 80 [g] : 100 [g]
serofill : 1
fft : 1 : TRUE : TRUE
ppm
phase : -193 : 0 : 50 [°]
Derived from: Hyrtioreticulin D-TFA-6.jd
```

[illegible]

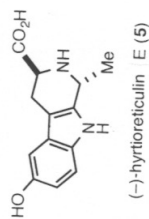

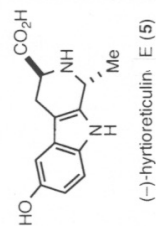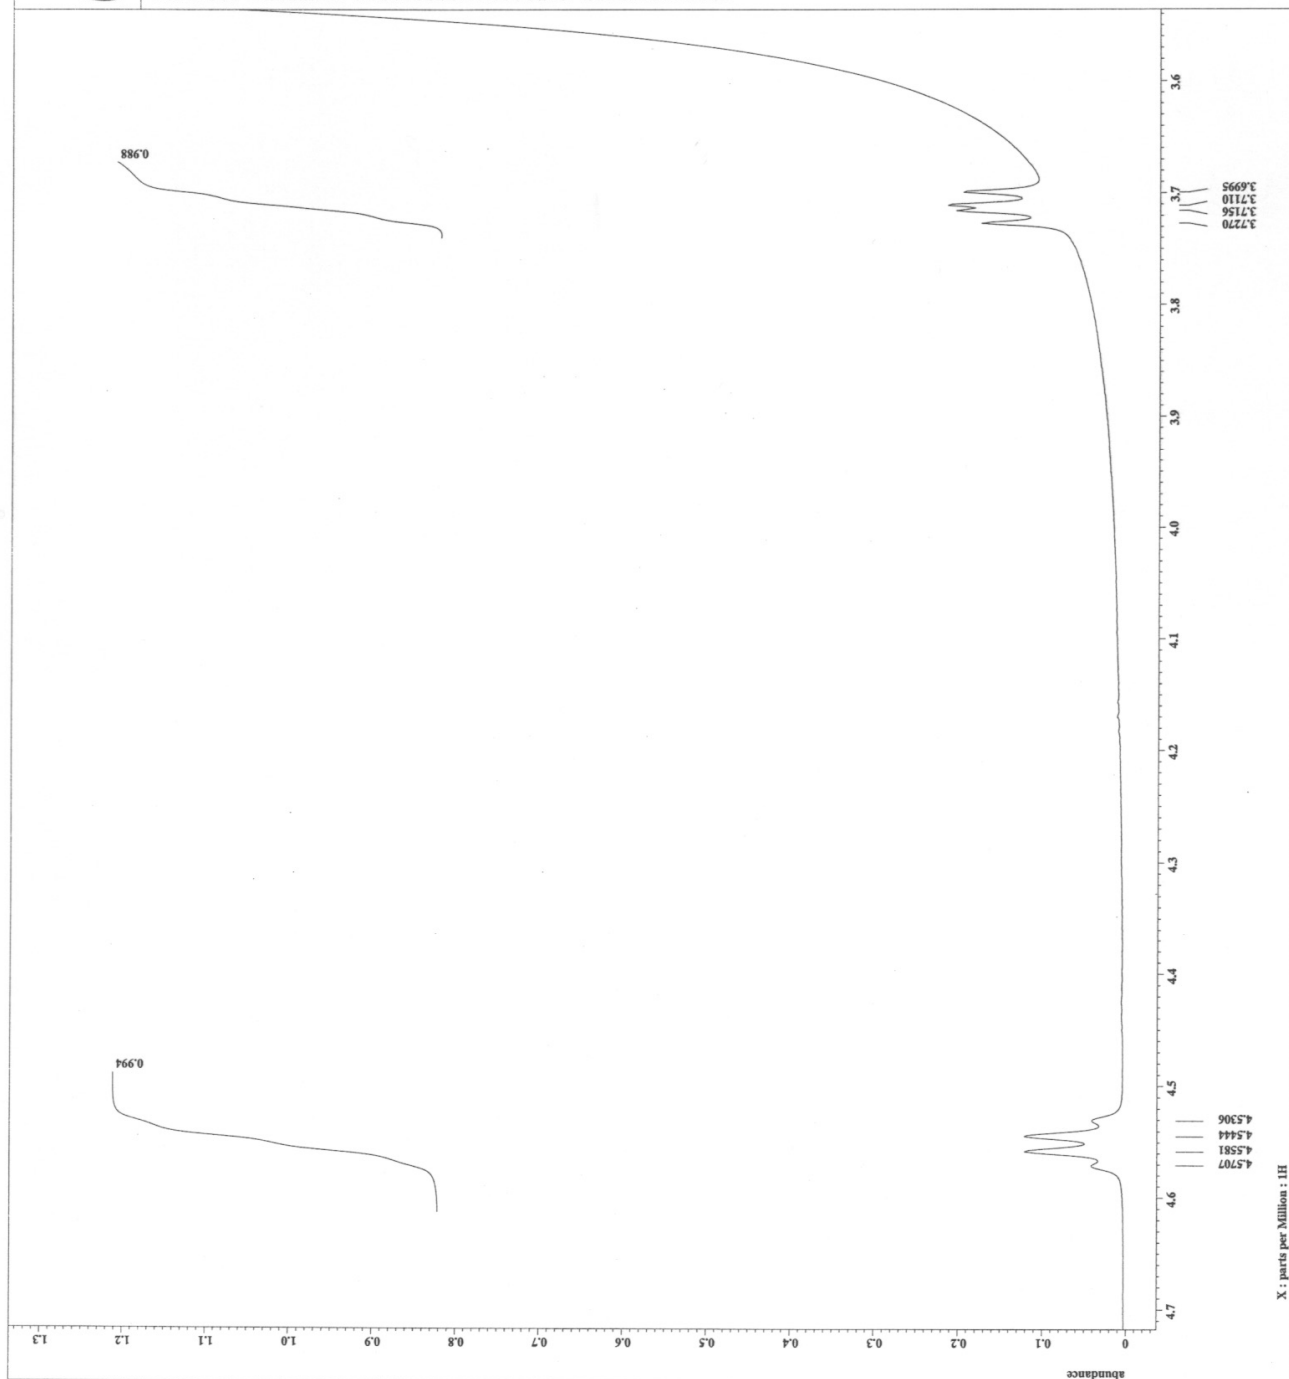

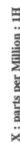

  
(-)-hyrtioretulin E (5)

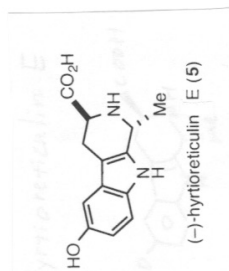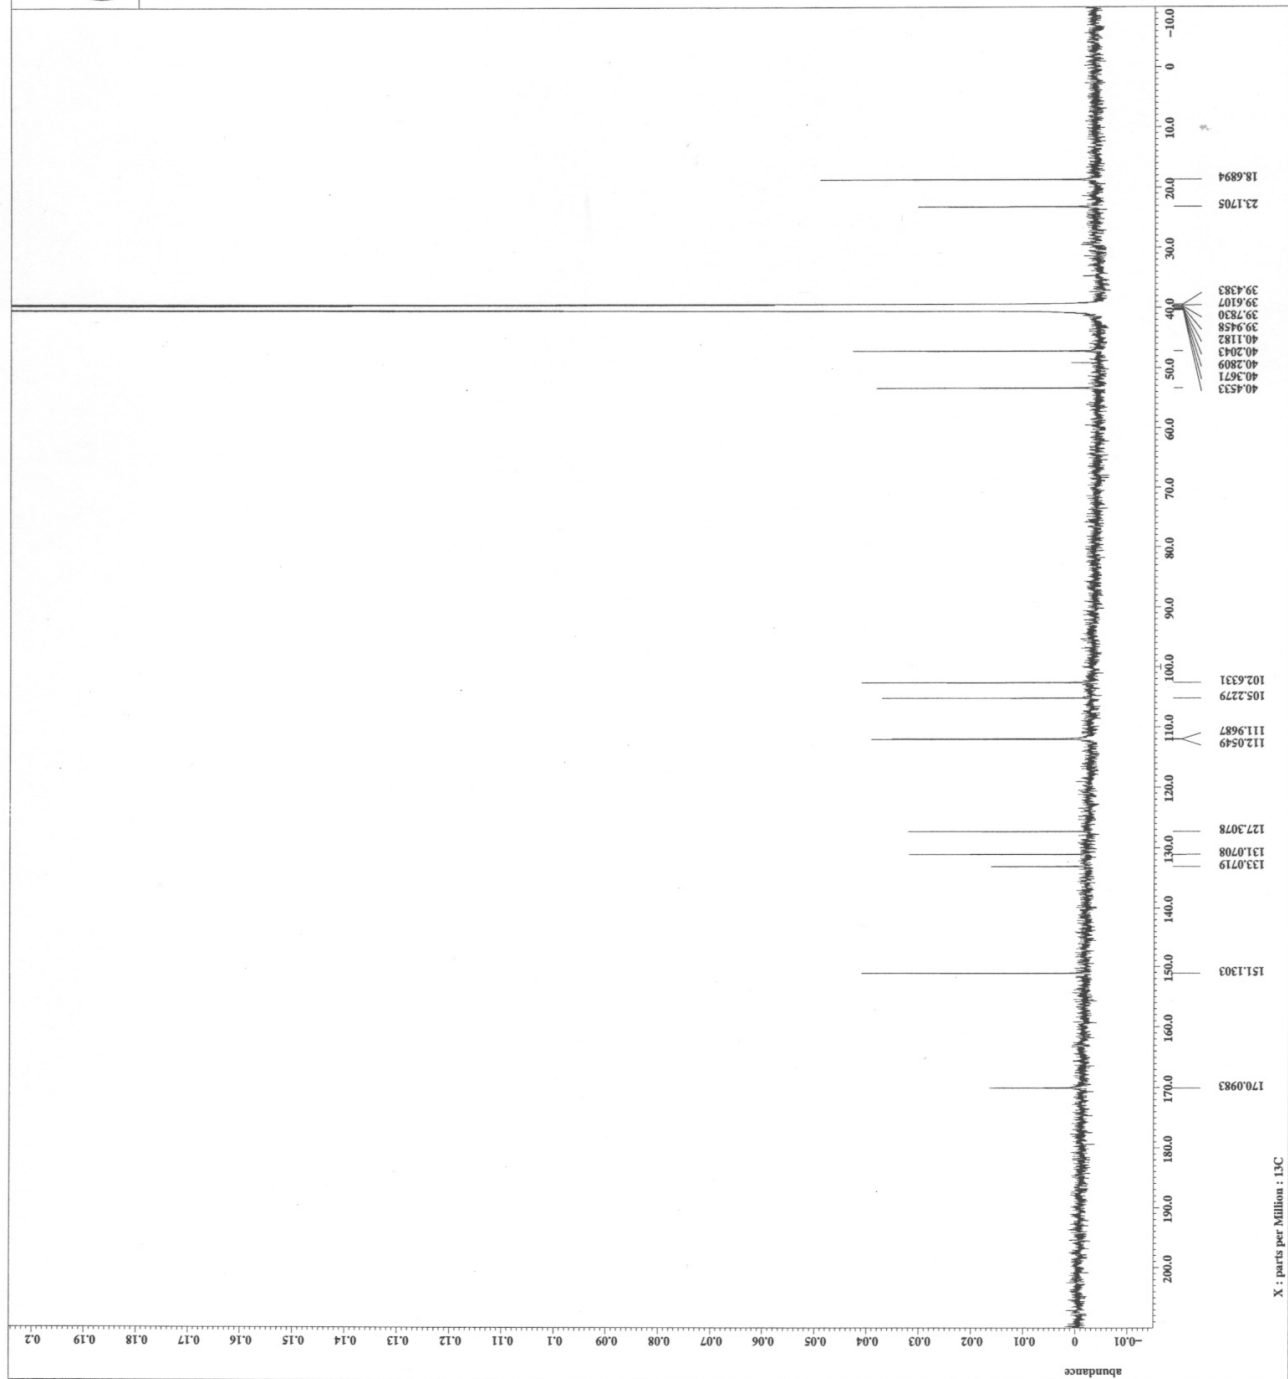

[illegible]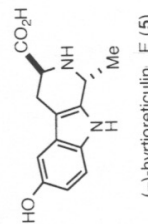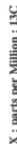



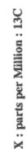

  
(-)-hyrtioreticulin E (5)

(-)-hyrtioreticulinal E (5)

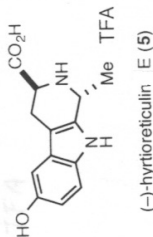



X : parts per Million : 1H

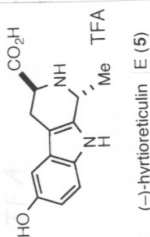



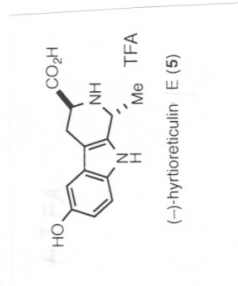

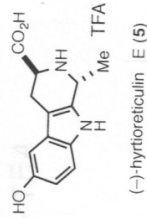

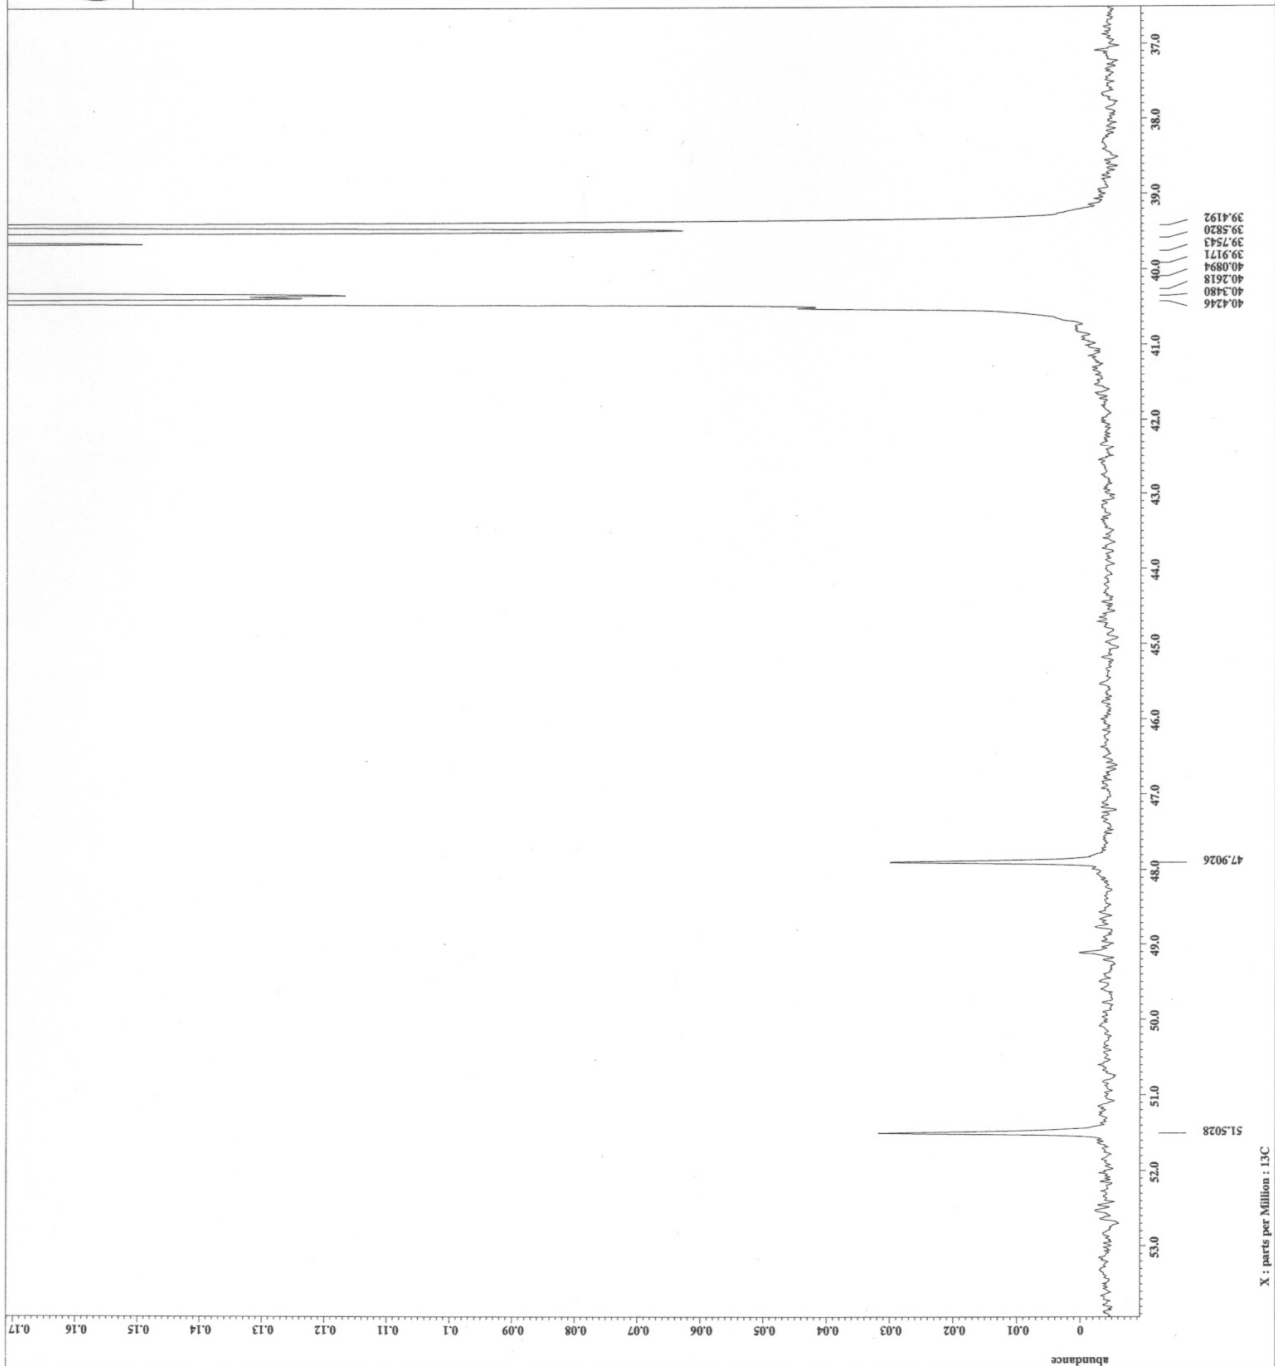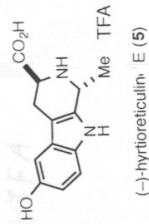





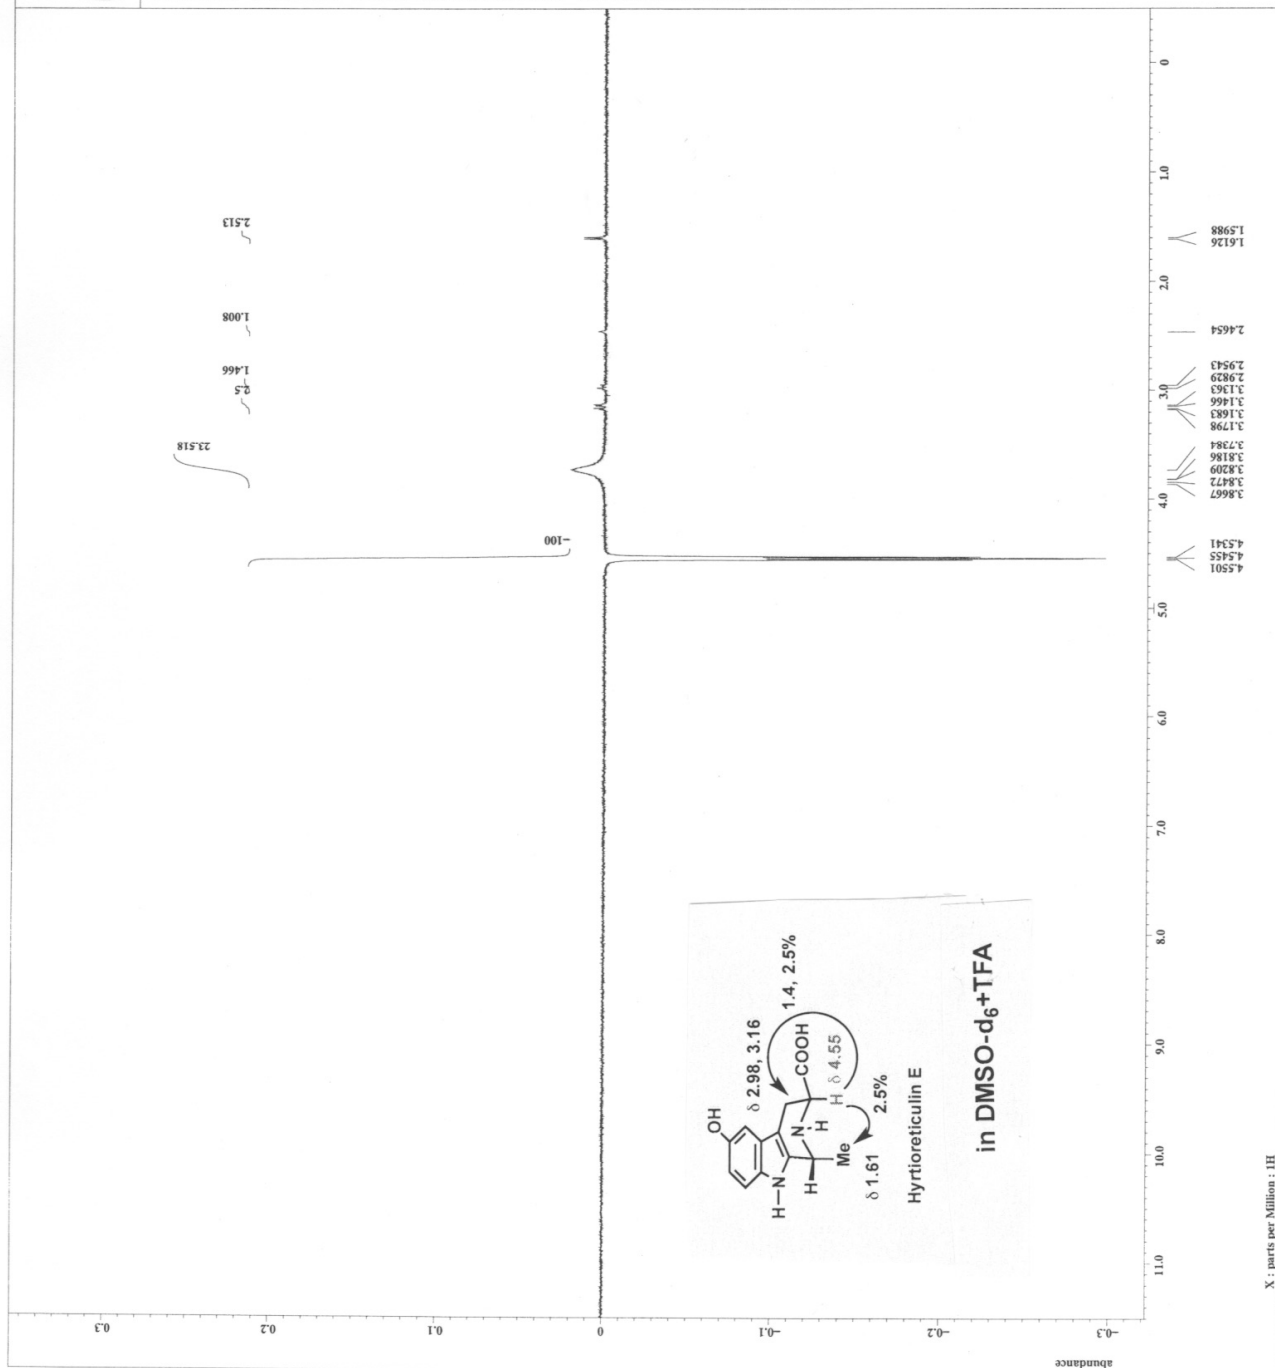

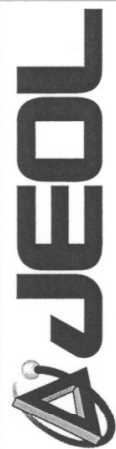

Filename = Hyrtioreticulin E.TFA  
Sample\_id = 1  
Experiment = noa\_1d\_0pfgse\_en  
Sample\_id = YANA  
Date\_acq = 2016-11-14 11:43:52  
Creation\_time = 21-DEC-2016 18:01:28  
Revision\_time = 21-DEC-2016 18:01:35  
Current\_time =  
Content = DPPQSE NOE 1d  
Data\_format = ID COMPLEX  
Data\_size = 11.43 MB  
Dm\_title =  
Dm\_units = [ppm]  
Dimensions = 500  
Spectrometer = DELTA2\_MMR  
Field\_strength = 11.43296431[G] (500[M]  
X\_acq\_duration = 1.76422512[s]  
X\_domain = 1H  
X\_freq = 495.1313398[MHz]  
X\_points = 16384  
X\_resolution = 2.866198[Hz]  
X\_sweep = 9.28677563[kHz]  
Irr\_domain = 1H  
Irr\_freq = 495.1313398[MHz]  
Irr\_mode = 1  
Irr\_pulse = 12.7[us]  
Irr\_shape = 1  
Irr\_time = 23.795[us]  
Obs\_sel\_offset = 1.6126[ppm]  
Obs\_sel\_shape = GAUSS  
Obs\_sel\_sweep = 10[ppm]  
Tri\_mode = off  
Dante\_preset = FALSE  
Grad\_1\_amp = 10[%]  
Grad\_1\_shape = 1[ms]  
Grad\_2\_amp = 30[%]  
Grad\_2\_shape = 10[%]  
Grad\_3\_amp = 0.1[ms]  
Grad\_3\_shape = 1[ms]  
Grad\_recovery = 1[ms]  
Mix\_time = 0.5[s]  
Recovery\_gain = 50  
Recovery\_delay = 6.76422512[s]  
Repetition\_time = 59.6[s]  
Temp\_set = 50[degC]

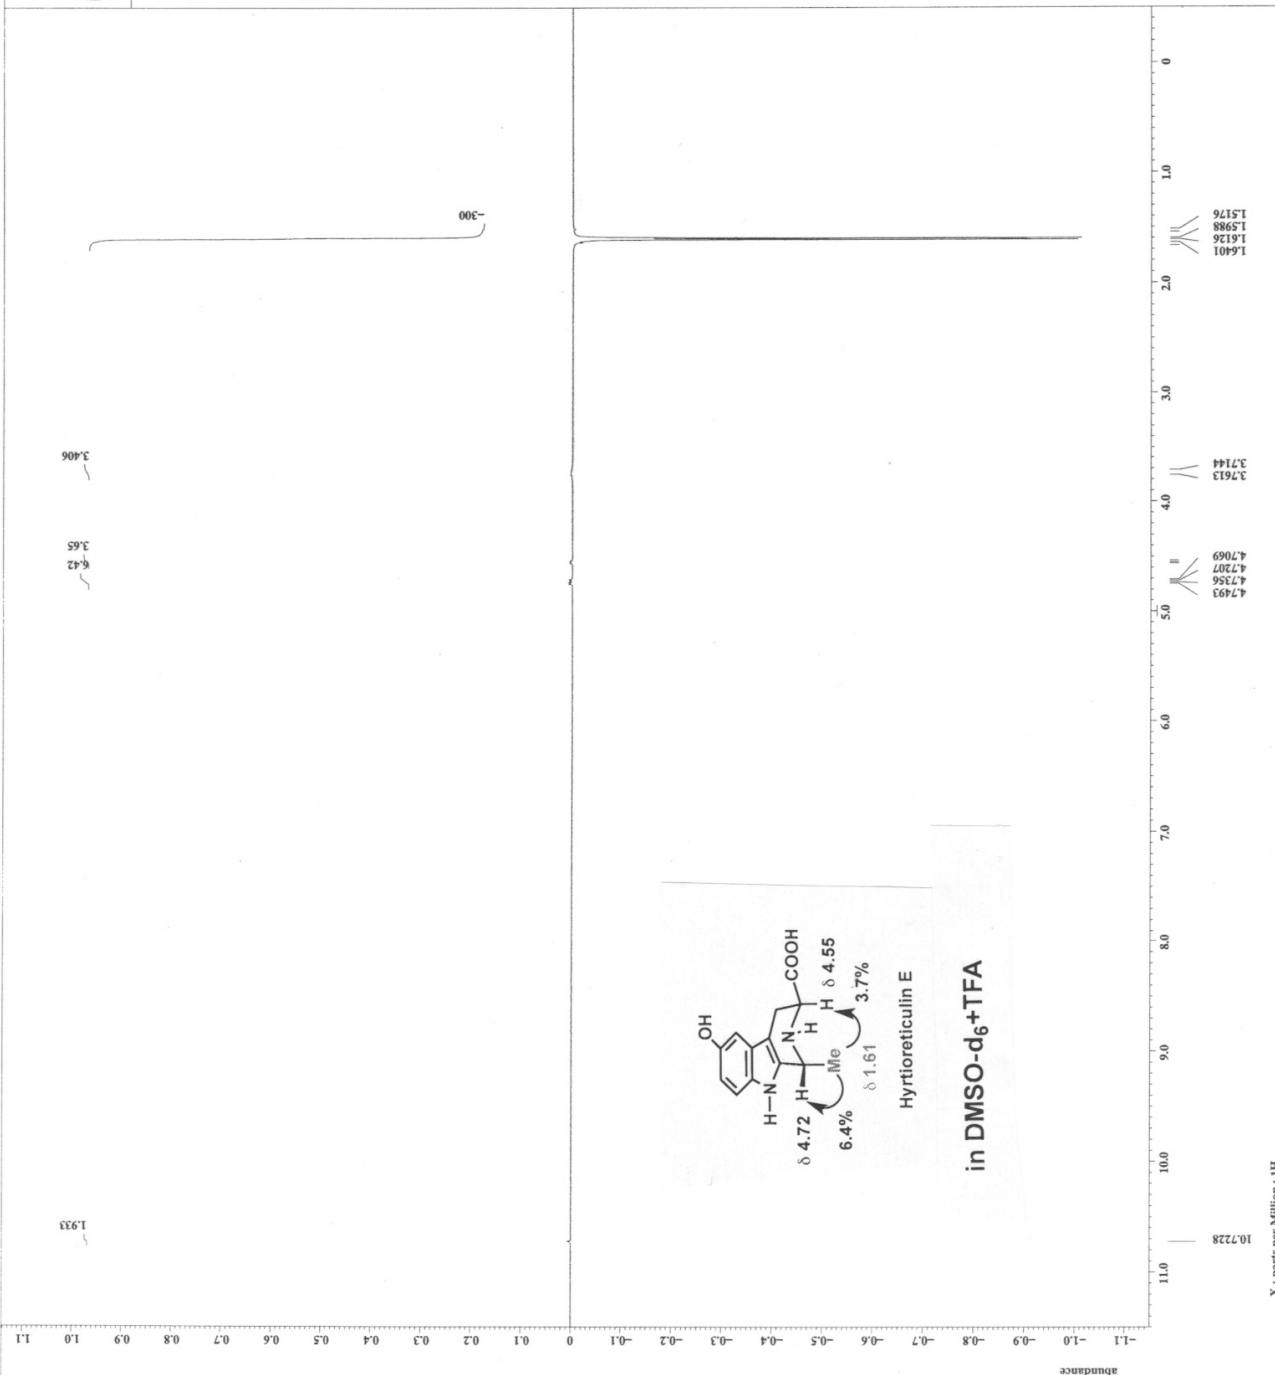

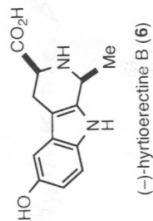

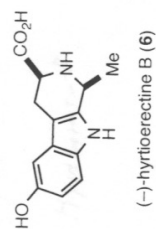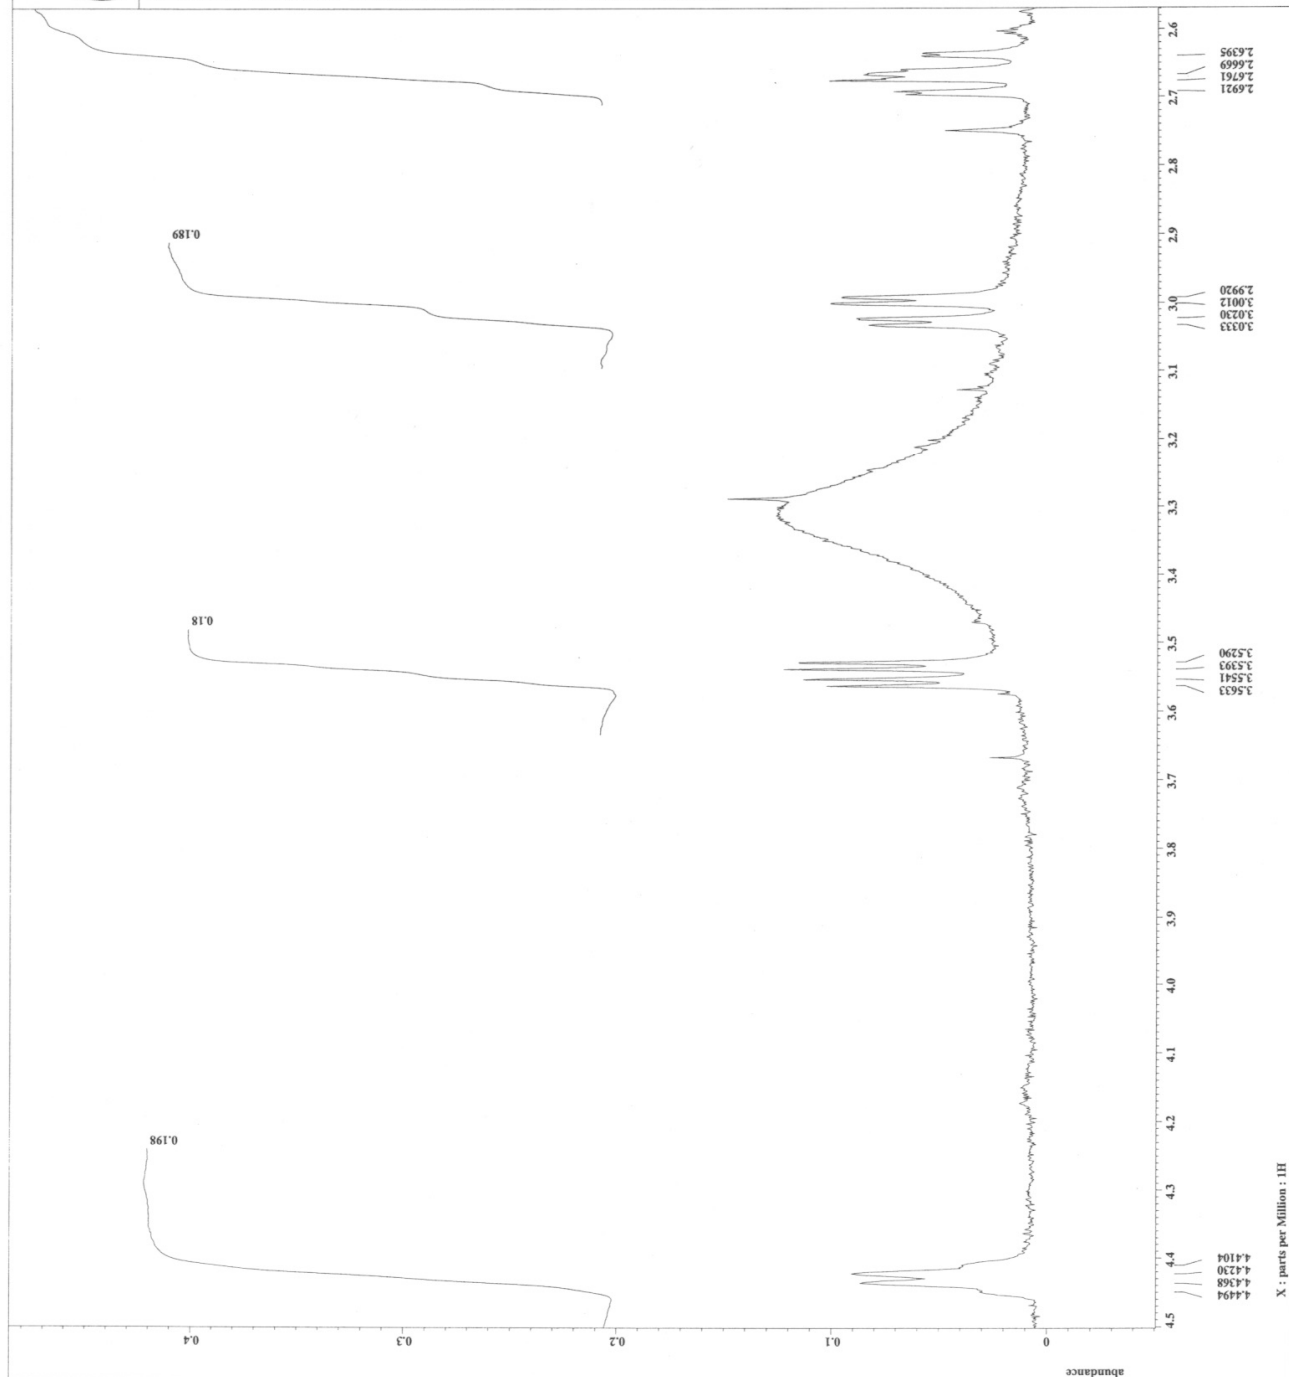

0.11

|                  |                        |
|------------------|------------------------|
| Filesname        | B-11                   |
| Author           | hydra                  |
| Experiment       | single_pulse_dec       |
| Sample           | DMSP-D6                |
| Solvent          | DMSP-D6                |
| Creation_time    | 10-DEC-2016 13:59:39   |
| Creation_date    | 10-DEC-2016 13:59:39   |
| Current_time     | 10-DEC-2016 14:09:29   |
| Content          | single_pulse decouple  |
| data format      | 1D COMPLEX             |
| Dma_line         | 26214                  |
| Dma_chan         | 13C                    |
| Dma_tune         | 13C                    |
| Dimensions       | 1                      |
| Site             | ECA 500                |
| Spectrometer     | DMSP4L_NOR             |
| field_strength   | 11.62936421 [T] (500IM |
| rotation         | 13                     |
| freq             | 134.9010055 [MHz]      |
| q                | 134.9010055 [MHz]      |
| offset           | 33748                  |
| q_resolution     | 1.1940925 [Hz]         |
| ir_resolution    | 18.4625 [Hz]           |
| ir_freq          | 495.13192398 [MHz]     |
| ir_tune          | FALSE                  |
| Glipped          | 1.00007                |
| Mod_return       | 60007                  |
| Total_scan       | 36 (us)                |
| X_90_dth         | 0.056018 [s]           |
| X_90_tan         | 30 [deg]               |
| X_angle          | 9.8 [deg]              |
| X_tau            | 9.8 [dB]               |
| ir_tau_dec       | 20.8 [333] [us]        |
| ir_tau_dec       | 20.8 [dB]              |
| ir_tau_dec       | 20.8 [dB]              |
| Decoupling       | TRUE                   |
| Initial_wait     | 1 [s]                  |
| Recv_gain        | 20                     |
| Recv_gain        | 60                     |
| Relaxation_delay | 2.000000 [s]           |
| Relaxation_time  | 2.000000 [s]           |
| Temp_get         | 21.1 [deg]             |

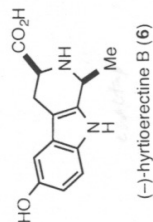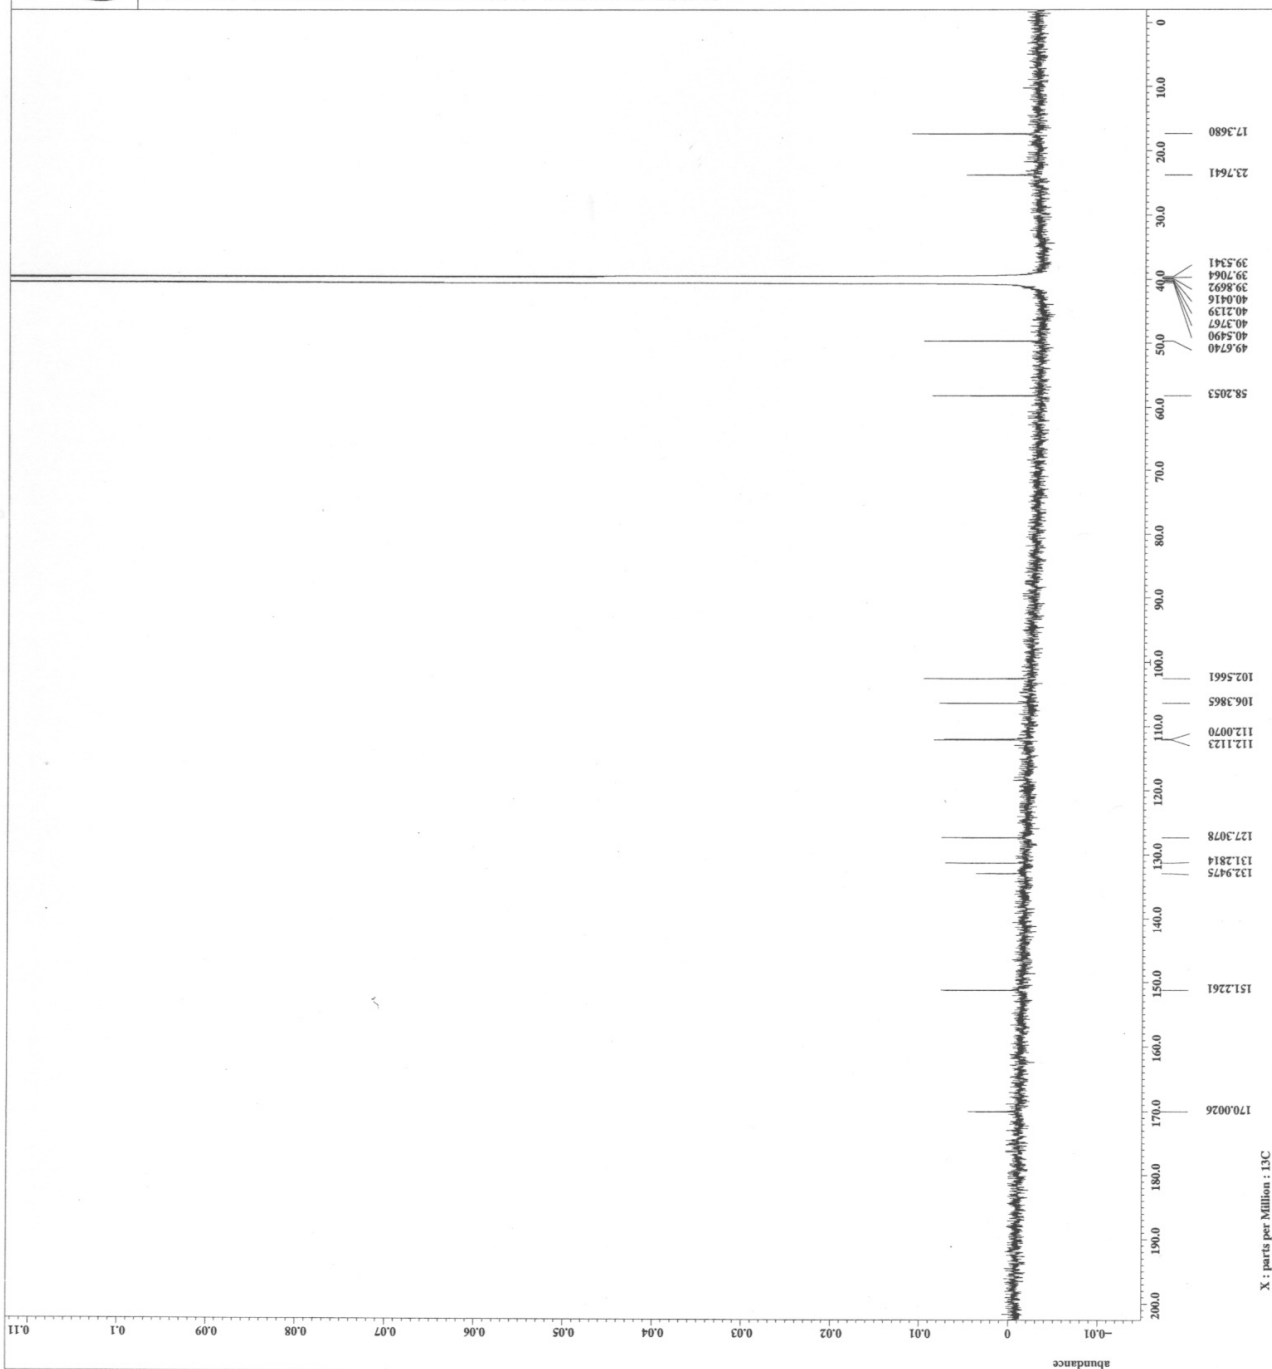

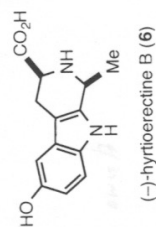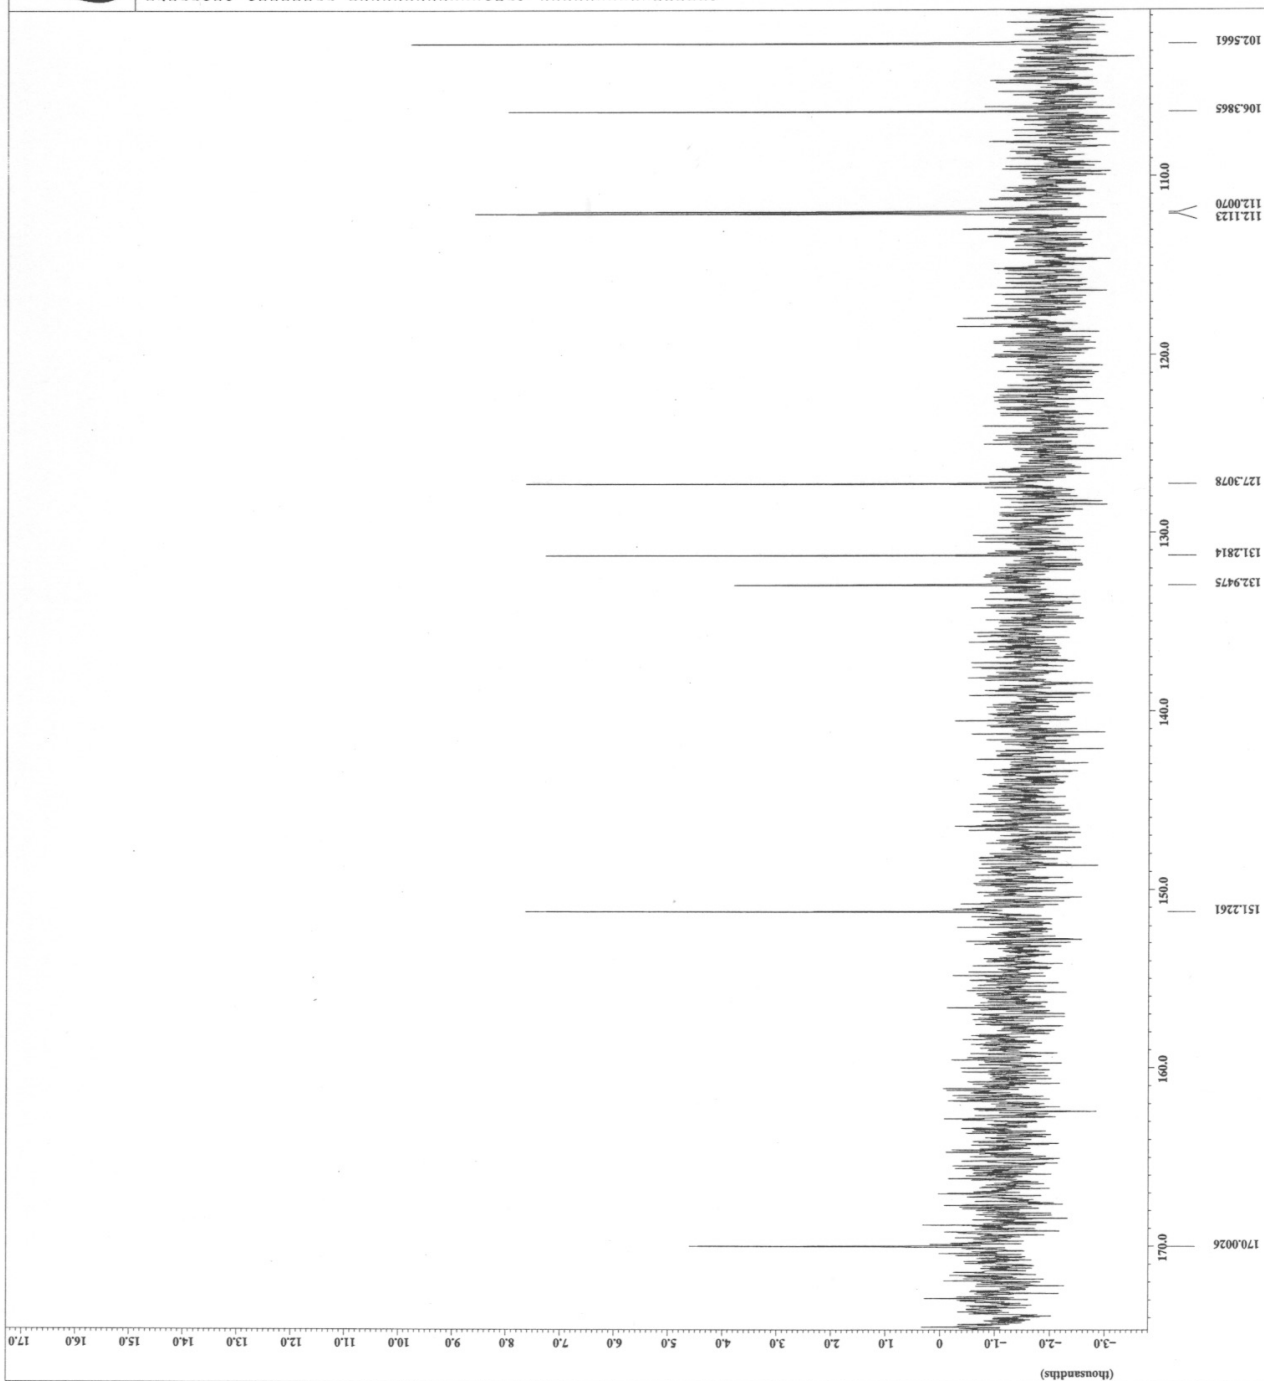

X : parts per Million : 13C
